# Supplementary material for: Theoretical investigations on P-stabilized boryl cation radicals: from the Aufbau principle to SOMO–HOMO conversion
Source: Royal Society of Chemistry journal article supplement (doi:10.1039/d2dt02723b), 2022-12-09
Supplement: d2dt02723b1.pdf [file d2dt02723b1.pdf]

## Supporting Information

### **Theoretical Investigations on P-stabilized Boryl Cation Radicals: From Aufbau Principle to SOMO-HOMO Conversion**

Yuyao Li,<sup>a,b</sup> Zhelin Ding,<sup>a,b</sup> Qiqi Mu,<sup>a,b</sup> Junle Ren,<sup>a,b</sup> Qiguang Shen,<sup>a,b</sup> Shoufeng Zhang,<sup>\*a</sup> and Li Zhang<sup>\*a</sup>

<sup>a</sup> *School of Electronic Engineering, Guangxi University of Science and Technology, Liuzhou 545000, Guangxi, China*

<sup>b</sup> *School of Automation, Guangxi University of Science and Technology, Liuzhou 545000, Guangxi, China*

*\*Corresponding authors.*

*E-mail: zhangli@gxust.edu.cn, zhangsf@gxust.edu.cn*

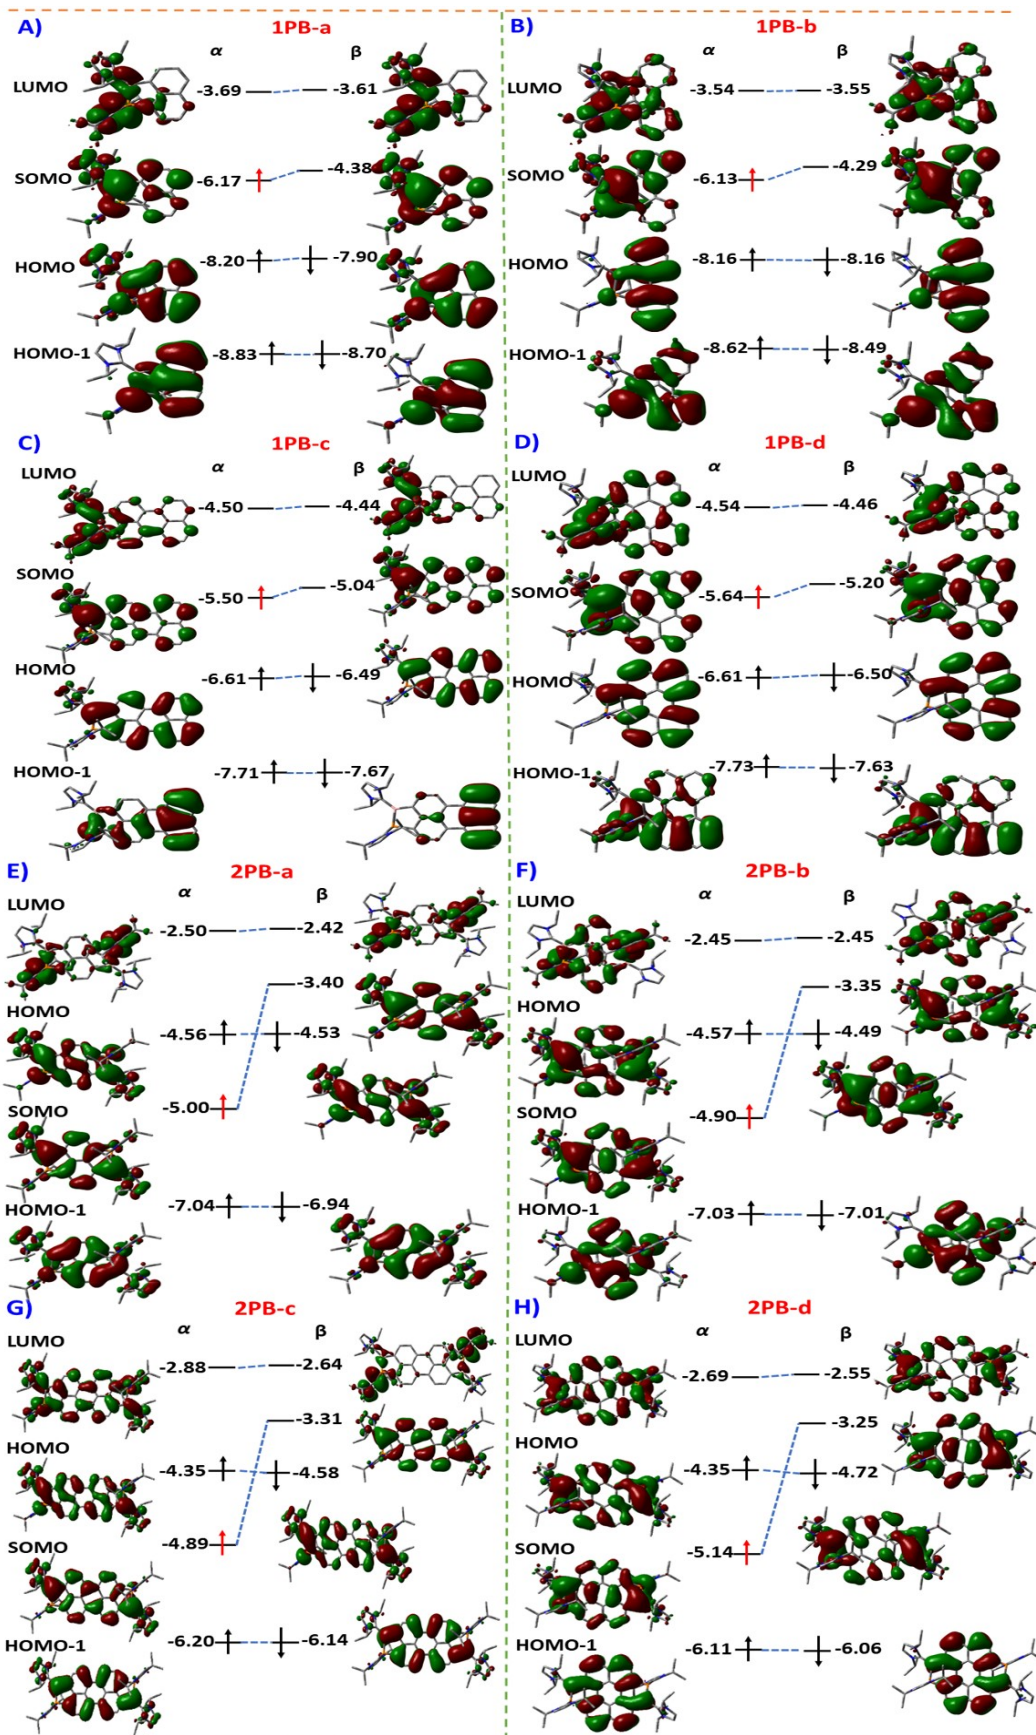

Figure S1. Orbital energies (in eV) and isosurfaces ( $\pm 0.02$  a.u.) for the studied compounds at UB3LYP-D3/6-31G(d) level.

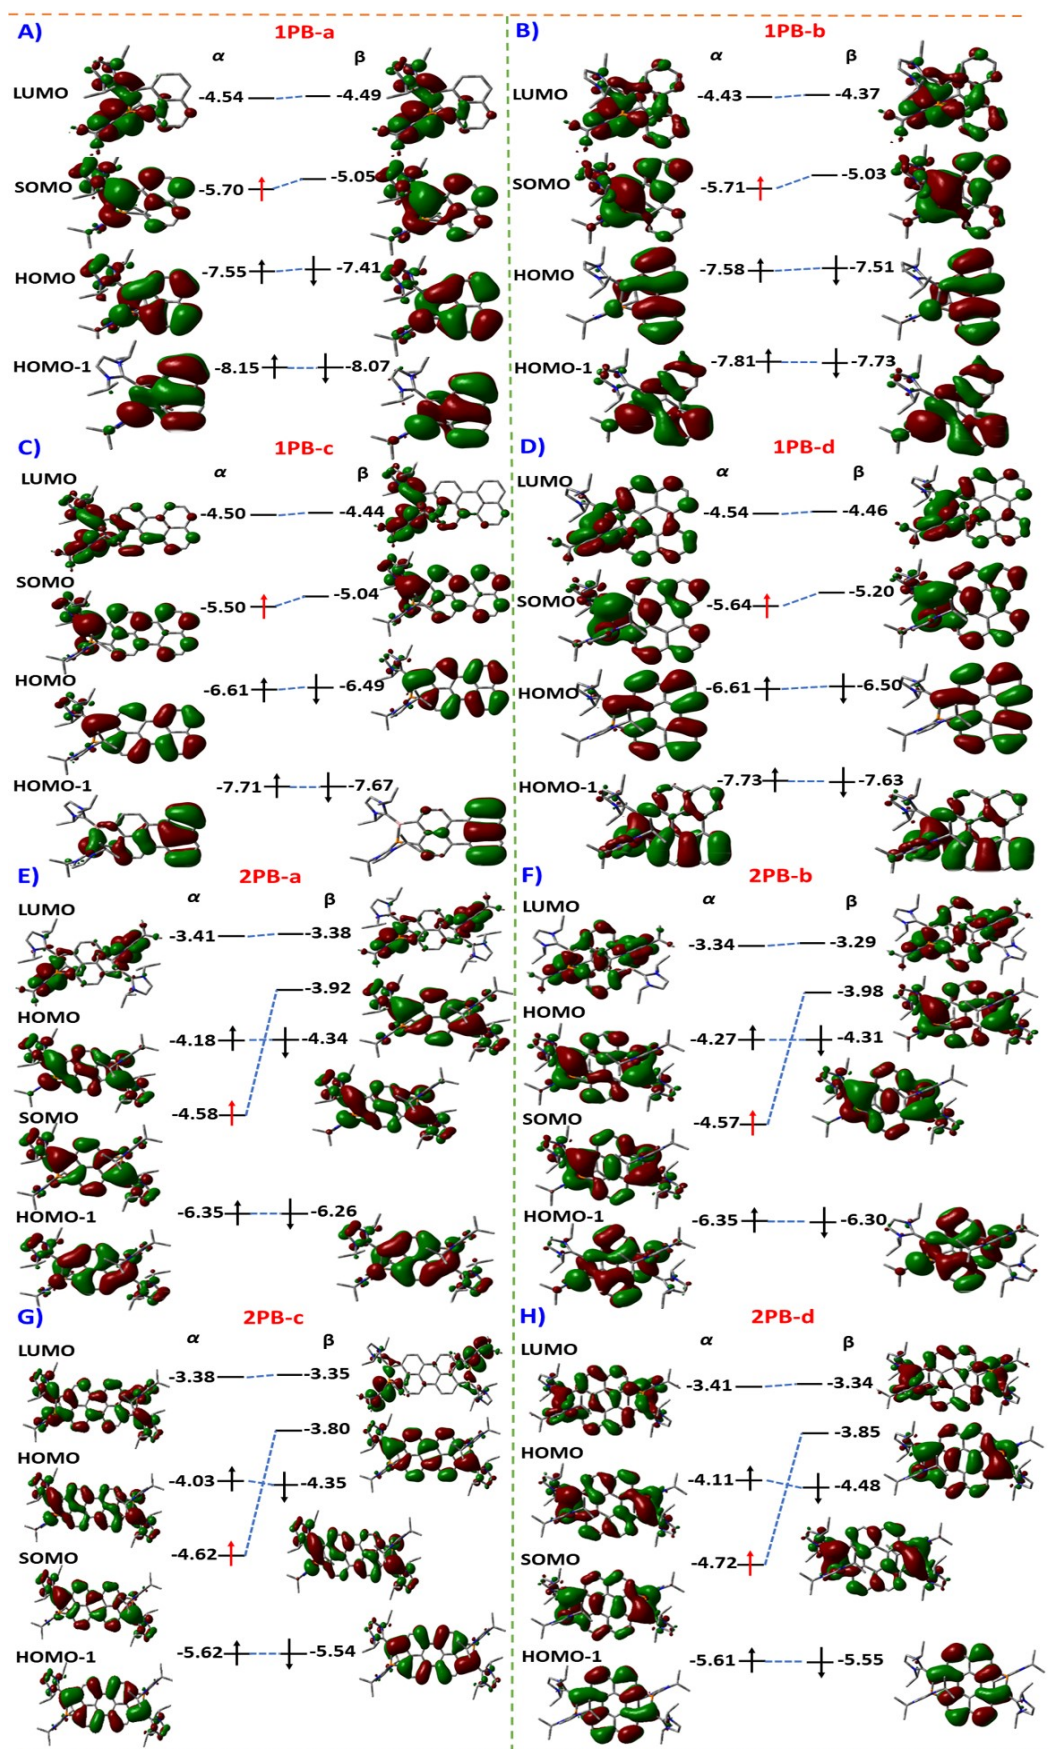

Figure S2. Orbital energies (in eV) and isosurfaces ( $\pm 0.02$  a.u.) for the studied compounds at UB3P86/6-31G(d) level.

**Table S1** NBO analysis data of the studied compounds from **1PB-a** to **1PB-d** on the basis of UB3LYP/6-31G(d) level.

|                                                     | <b>1PB-a</b>                         | <b>1PB-b</b>                         | <b>1PB-c</b>                         | <b>1PB-d</b>                         |
|-----------------------------------------------------|--------------------------------------|--------------------------------------|--------------------------------------|--------------------------------------|
| $d_{(P-B)}/\text{\AA}$                              | 1.96                                 | 1.91                                 | 1.96                                 | 1.90                                 |
| Occ.(LP <sub>P</sub> ) <sup>[a]</sup>               | 0.93                                 | 0.92                                 | 0.93                                 | 0.91                                 |
| Occ.(LP* <sub>B</sub> ) <sup>[a]</sup>              | 0.14                                 | 0.13                                 | 0.18                                 | 0.18                                 |
| Occ.(σ <sub>P-C</sub> ) <sup>[a]</sup>              | 0.98                                 | 0.98                                 | 0.98                                 | 0.97                                 |
| Occ.(σ <sub>B-C</sub> ) <sup>[a]</sup>              | 0.98                                 | 0.98                                 | 0.98                                 | 0.98                                 |
| Occ.(σ <sub>P-B</sub> ) <sup>[a]</sup>              | 0.96                                 | 0.97                                 | 0.96                                 | 0.97                                 |
| Polarization% <sup>[b]</sup>                        | 56.33(P)                             | 55.27(P)                             | 56.11(P)                             | 54.44(P)                             |
| (σ <sub>P-B</sub> )                                 | 43.67(B)                             | 44.73(B)                             | 43.89(B)                             | 45.56(B)                             |
| Hybridisation <sup>[c]</sup>                        | sp <sup>3.50</sup> d <sup>0.01</sup> | sp <sup>2.95</sup> d <sup>0.01</sup> | sp <sup>3.52</sup> d <sup>0.01</sup> | sp <sup>3.06</sup> d <sup>0.01</sup> |
| (σ <sub>P-B</sub> )                                 | sp <sup>2.37</sup> d <sup>0.00</sup> | sp <sup>2.12</sup> d <sup>0.00</sup> | sp <sup>2.39</sup> d <sup>0.00</sup> | sp <sup>2.13</sup> d <sup>0.00</sup> |
| $E(2)^{[d]}$ (LP <sub>P</sub> →LP* <sub>B</sub> )   | 3.77                                 | 3.73                                 | 3.75                                 | 4.83                                 |
| $E(2)^{[d]}$ (LP* <sub>B</sub> →σ* <sub>P-C</sub> ) | 2.15                                 | 2.64                                 | 2.52                                 | 3.04                                 |

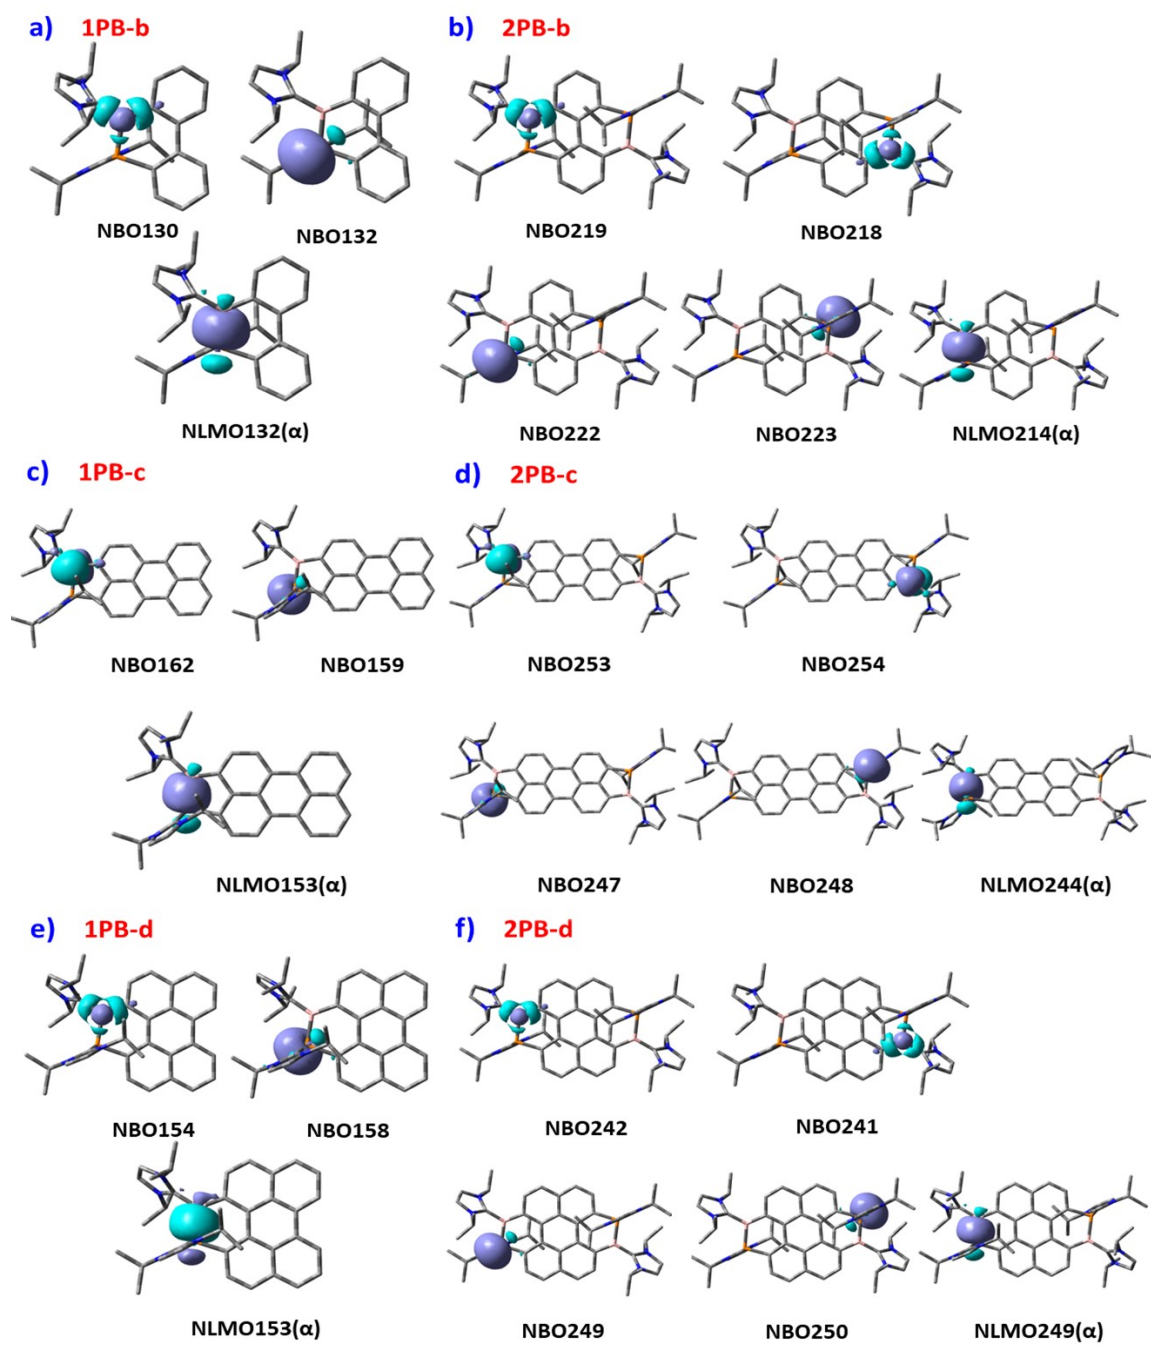

**Figure S3.** Calculated NBOs and NLMOs that show the  $LP_p$  and the localized  $LP_B^*$  in the studied compounds.

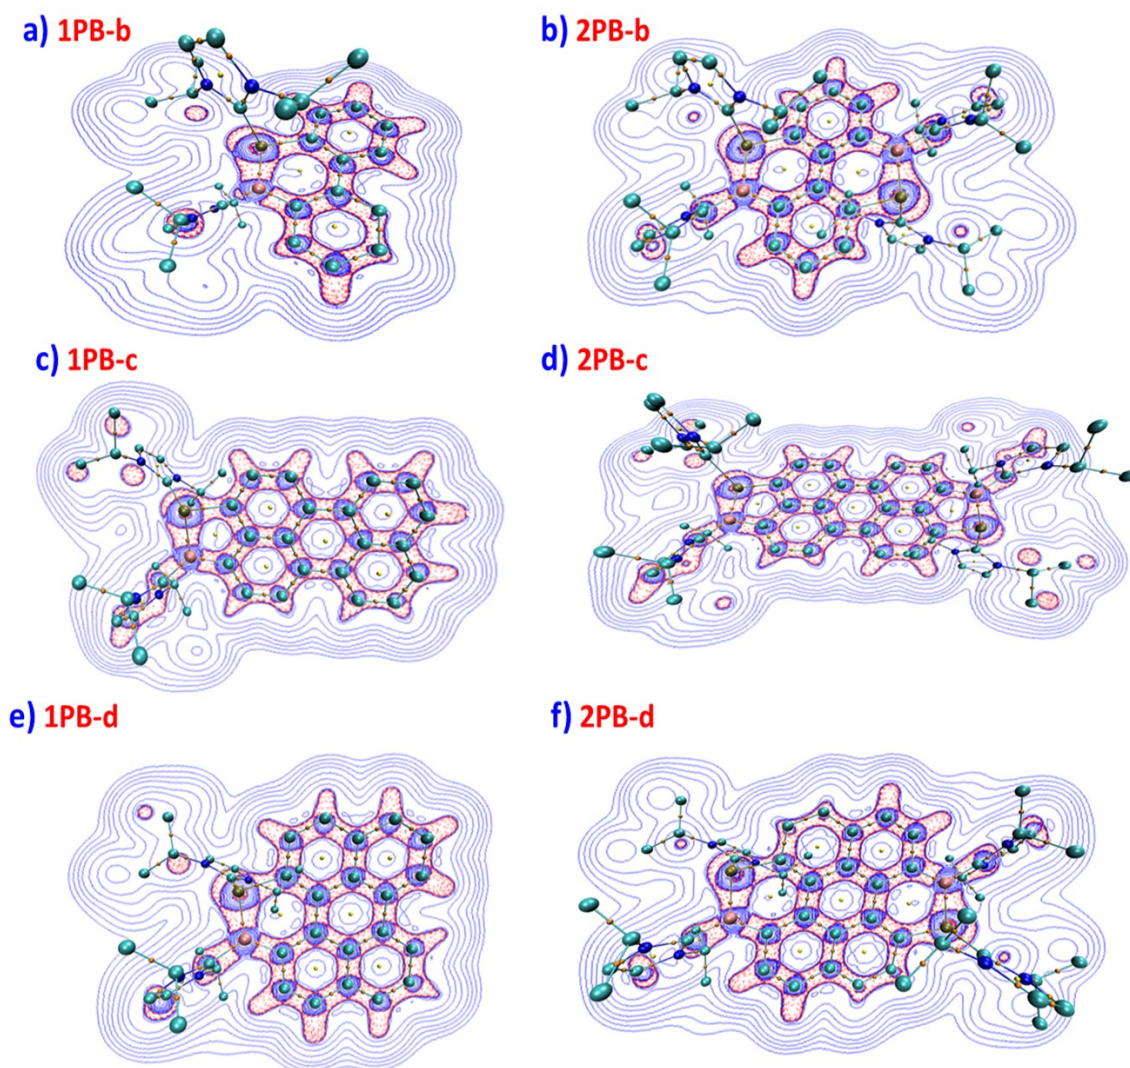

**Figure S4.** Plot of the Laplacian  $\nabla^2\rho(r)$  and critical points in the plane containing P and B atoms at the UB3LYP/6-31G(d) level of theory. Red dashed lines indicate areas of charge concentration ( $\nabla^2\rho(r)<0$ ) while solid blue lines show areas of charge depletion ( $\nabla^2\rho(r)>0$ ). Orange dots are bond critical points, yellow dots are ring critical points.

**Table S2** Calculated excited wavelengths ( $\lambda$ ), oscillator strengths ( $f$ ) and the transition nature of the selected transitions of studied compounds at TD-DFT//UB3LYP/6-31G(d) level.

| Compounds    | Excited state | Wavelength/nm | $f$  | Transition nature                                 |     |
|--------------|---------------|---------------|------|---------------------------------------------------|-----|
| <b>1PB-a</b> | $S_1$         | 692.2         | 0.06 | SOMO( $\alpha$ ) $\rightarrow$ LUMO( $\alpha$ )   | 94% |
|              | $S_5$         | 439.7         | 0.14 | HOMO( $\beta$ ) $\rightarrow$ SUMO( $\beta$ )     | 66% |
| <b>1PB-b</b> | $S_1$         | 676.5         | 0.02 | SOMO( $\alpha$ ) $\rightarrow$ LUMO( $\alpha$ )   | 99% |
|              | $S_3$         | 500.8         | 0.04 | HOMO( $\alpha$ ) $\rightarrow$ LUMO+3( $\alpha$ ) | 72% |
|              | $S_5$         | 415.3         | 0.04 | HOMO( $\beta$ ) $\rightarrow$ SUMO( $\beta$ )     | 57% |
|              | $S_{12}$      | 322.7         | 0.12 | HOMO-2( $\beta$ ) $\rightarrow$ SUMO( $\beta$ )   | 50% |
| <b>1PB-c</b> | $S_1$         | 983.0         | 0.10 | SOMO( $\alpha$ ) $\rightarrow$ LUMO( $\alpha$ )   | 86% |
|              | $S_3$         | 612.5         | 0.04 | SOMO( $\alpha$ ) $\rightarrow$ LUMO+1( $\alpha$ ) | 94% |
|              | $S_5$         | 496.1         | 0.17 | SOMO( $\alpha$ ) $\rightarrow$ LUMO+2( $\alpha$ ) | 69% |
|              | $S_6$         | 480.8         | 0.15 | SOMO( $\alpha$ ) $\rightarrow$ LUMO+3( $\alpha$ ) | 81% |
|              | $S_{10}$      | 396.9         | 0.10 | HOMO-1( $\beta$ ) $\rightarrow$ SUMO( $\beta$ )   | 57% |

|              |          |        |      |                                                                                                                                                                                                            |                          |
|--------------|----------|--------|------|------------------------------------------------------------------------------------------------------------------------------------------------------------------------------------------------------------|--------------------------|
| <b>1PB-d</b> | $S_{27}$ | 304.3  | 0.09 | HOMO-1( $\beta$ ) $\rightarrow$ LUMO( $\beta$ )                                                                                                                                                            | 36%                      |
|              | $S_1$    | 890.0  | 0.04 | SOMO( $\alpha$ ) $\rightarrow$ LUMO( $\alpha$ )                                                                                                                                                            | 82%                      |
|              | $S_2$    | 690.4  | 0.11 | HOMO( $\beta$ ) $\rightarrow$ SUMO( $\beta$ )                                                                                                                                                              | 69%                      |
|              | $S_8$    | 428.1  | 0.05 | HOMO-1( $\beta$ ) $\rightarrow$ SUMO( $\beta$ )                                                                                                                                                            | 70%                      |
|              | $S_{10}$ | 395.2  | 0.11 | HOMO( $\beta$ ) $\rightarrow$ LUMO( $\beta$ )<br>HOMO( $\alpha$ ) $\rightarrow$ LUMO( $\alpha$ )                                                                                                           | 34%<br>22%               |
| <b>2PB-a</b> | $S_{16}$ | 346.6  | 0.19 | SOMO( $\alpha$ ) $\rightarrow$ LUMO+6( $\alpha$ )<br>HOMO-5( $\beta$ ) $\rightarrow$ SUMO( $\beta$ )<br>HOMO-2( $\beta$ ) $\rightarrow$ SUMO( $\beta$ )<br>HOMO-4( $\beta$ ) $\rightarrow$ SUMO( $\beta$ ) | 22%<br>17%<br>17%<br>12% |
|              | $S_1$    | 2339.7 | 0.08 | HOMO( $\beta$ ) $\rightarrow$ SUMO( $\beta$ )                                                                                                                                                              | 96%                      |
|              | $S_3$    | 852.1  | 0.20 | HOMO( $\alpha$ ) $\rightarrow$ LUMO( $\alpha$ )                                                                                                                                                            | 91%                      |
|              | $S_6$    | 748.3  | 0.16 | HOMO( $\alpha$ ) $\rightarrow$ LUMO+2( $\alpha$ )<br>HOMO( $\beta$ ) $\rightarrow$ LUMO( $\beta$ )                                                                                                         | 53%<br>44%               |
|              | $S_{15}$ | 454.4  | 0.44 | SOMO( $\alpha$ ) $\rightarrow$ LUMO+3( $\alpha$ )<br>HOMO( $\beta$ ) $\rightarrow$ LUMO+3( $\beta$ )                                                                                                       | 53%<br>27%               |
| <b>2PB-b</b> | $S_{26}$ | 386.5  | 0.19 | HOMO-2( $\beta$ ) $\rightarrow$ SUMO( $\beta$ )                                                                                                                                                            | 68%                      |
|              | $S_1$    | 2641.3 | 0.07 | HOMO( $\beta$ ) $\rightarrow$ SUMO( $\beta$ )                                                                                                                                                              | 97%                      |
|              | $S_3$    | 846.4  | 0.09 | HOMO( $\alpha$ ) $\rightarrow$ LUMO( $\alpha$ )                                                                                                                                                            | 95%                      |
|              | $S_9$    | 612.1  | 0.08 | HOMO( $\alpha$ ) $\rightarrow$ LUMO+2( $\alpha$ )<br>HOMO( $\beta$ ) $\rightarrow$ LUMO+3( $\beta$ )                                                                                                       | 44%<br>17%               |
| <b>2PB-c</b> | $S_{11}$ | 569.0  | 0.23 | HOMO( $\alpha$ ) $\rightarrow$ LUMO+4( $\alpha$ )<br>HOMO( $\beta$ ) $\rightarrow$ LUMO+4( $\beta$ )                                                                                                       | 46%<br>34%               |
|              | $S_1$    | 1779.1 | 0.02 | HOMO( $\beta$ ) $\rightarrow$ SUMO( $\beta$ )                                                                                                                                                              | 75%                      |
|              | $S_2$    | 1068.0 | 0.89 | HOMO( $\alpha$ ) $\rightarrow$ LUMO( $\alpha$ )                                                                                                                                                            | 73%                      |
|              | $S_7$    | 661.9  | 0.09 | HOMO( $\beta$ ) $\rightarrow$ LUMO+1( $\beta$ )                                                                                                                                                            | 96%                      |
|              | $S_{10}$ | 567.6  | 0.13 | HOMO( $\beta$ ) $\rightarrow$ LUMO+3( $\beta$ )                                                                                                                                                            | 81%                      |
|              | $S_{17}$ | 506.9  | 0.09 | HOMO( $\beta$ ) $\rightarrow$ LUMO+4( $\beta$ )<br>HOMO( $\beta$ ) $\rightarrow$ LUMO+5( $\beta$ )                                                                                                         | 31%<br>29%               |
|              | $S_{19}$ | 466.8  | 0.12 | HOMO( $\alpha$ ) $\rightarrow$ LUMO+9( $\alpha$ )<br>SOMO( $\alpha$ ) $\rightarrow$ LUMO+3( $\alpha$ )                                                                                                     | 49%<br>11%               |
| <b>2PB-d</b> | $S_{20}$ | 456.9  | 0.16 | SOMO( $\alpha$ ) $\rightarrow$ LUMO+3( $\alpha$ )<br>HOMO( $\beta$ ) $\rightarrow$ LUMO+5( $\beta$ )                                                                                                       | 32%<br>21%               |
|              | $S_1$    | 1519.6 | 0.06 | HOMO( $\beta$ ) $\rightarrow$ SUMO( $\beta$ )                                                                                                                                                              | 74%                      |
|              | $S_2$    | 1010.6 | 0.33 | HOMO( $\alpha$ ) $\rightarrow$ LUMO( $\alpha$ )                                                                                                                                                            | 73%                      |
|              | $S_5$    | 662.3  | 0.07 | HOMO( $\alpha$ ) $\rightarrow$ LUMO+2( $\alpha$ )                                                                                                                                                          | 88%                      |
|              | $S_9$    | 590.2  | 0.12 | HOMO( $\alpha$ ) $\rightarrow$ LUMO+4( $\alpha$ )<br>HOMO( $\beta$ ) $\rightarrow$ LUMO+1( $\beta$ )                                                                                                       | 53%<br>34%               |
|              | $S_{12}$ | 514.2  | 0.08 | HOMO( $\beta$ ) $\rightarrow$ LUMO+3( $\beta$ )                                                                                                                                                            | 76%                      |
|              | $S_{21}$ | 439.0  | 0.06 | SOMO( $\alpha$ ) $\rightarrow$ LUMO+3( $\alpha$ )                                                                                                                                                          | 72%                      |

**Table S3** Calculated excited wavelengths ( $\lambda$ ), oscillator strengths ( $f$ ) and the transition nature of the selected transitions of studied compounds at TD-DFT//U $\omega$ B97XD/6-31G(d) level.

| Compounds                                         | Excited state   | Wavelength/nm | $f$                                             | Transition nature                                 |       |
|---------------------------------------------------|-----------------|---------------|-------------------------------------------------|---------------------------------------------------|-------|
| <b>1PB-a</b>                                      | S <sub>1</sub>  | 597.5         | 0.09                                            | SOMO( $\alpha$ ) $\rightarrow$ LUMO( $\alpha$ )   | 85%   |
|                                                   | S <sub>3</sub>  | 414.7         | 0.09                                            | SOMO( $\alpha$ ) $\rightarrow$ LUMO+2( $\alpha$ ) | 38%   |
|                                                   |                 |               |                                                 | HOMO( $\alpha$ ) $\rightarrow$ LUMO( $\alpha$ )   | 12%   |
| <b>1PB-b</b>                                      | S <sub>1</sub>  | 526.2         | 0.04                                            | SOMO( $\alpha$ ) $\rightarrow$ LUMO( $\alpha$ )   | 91%   |
|                                                   | S <sub>3</sub>  | 432.5         | 0.04                                            | SOMO( $\alpha$ ) $\rightarrow$ LUMO+3( $\alpha$ ) | 60%   |
|                                                   | S <sub>8</sub>  | 320.8         | 0.06                                            | HOMO( $\beta$ ) $\rightarrow$ SUMO( $\beta$ )     | 32%   |
|                                                   |                 |               |                                                 | HOMO-1( $\beta$ ) $\rightarrow$ SUMO( $\beta$ )   | 15%   |
| <b>1PB-c</b>                                      | S <sub>1</sub>  | 820.4         | 0.12                                            | SOMO( $\alpha$ ) $\rightarrow$ LUMO( $\alpha$ )   | 79%   |
|                                                   | S <sub>2</sub>  | 585.6         | 0.36                                            | HOMO( $\beta$ ) $\rightarrow$ SUMO( $\beta$ )     | 46%   |
|                                                   | S <sub>5</sub>  | 413.5         | 0.30                                            | SOMO( $\alpha$ ) $\rightarrow$ LUMO+2( $\alpha$ ) | 43%   |
|                                                   | S <sub>9</sub>  | 348.6         | 0.15                                            | HOMO( $\beta$ ) $\rightarrow$ LUMO( $\beta$ )     | 35%   |
| HOMO( $\alpha$ ) $\rightarrow$ LUMO( $\alpha$ )   |                 |               |                                                 | 21%                                               |       |
| <b>1PB-d</b>                                      | S <sub>1</sub>  | 733.2         | 0.05                                            | SOMO( $\alpha$ ) $\rightarrow$ LUMO( $\alpha$ )   | 71%   |
|                                                   | S <sub>2</sub>  | 621.7         | 0.13                                            | HOMO( $\beta$ ) $\rightarrow$ SUMO( $\beta$ )     | 49%   |
|                                                   |                 |               |                                                 | SOMO( $\alpha$ ) $\rightarrow$ LUMO( $\alpha$ )   | 19%   |
|                                                   | S <sub>3</sub>  | 451.4         | 0.09                                            | HOMO( $\alpha$ ) $\rightarrow$ LUMO( $\alpha$ )   | 24%   |
|                                                   |                 |               |                                                 | HOMO( $\beta$ ) $\rightarrow$ SUMO( $\beta$ )     | 20%   |
|                                                   | S <sub>5</sub>  | 403.9         | 0.05                                            | SOMO( $\alpha$ ) $\rightarrow$ LUMO+2( $\alpha$ ) | 65%   |
|                                                   |                 |               |                                                 | S <sub>12</sub>                                   | 331.2 |
|                                                   |                 |               | HOMO-2( $\beta$ ) $\rightarrow$ SUMO( $\beta$ ) | 16%                                               |       |
| <b>2PB-a</b>                                      | S <sub>1</sub>  | 2822.3        | 0.13                                            | HOMO( $\beta$ ) $\rightarrow$ SUMO( $\beta$ )     | 98%   |
|                                                   | S <sub>2</sub>  | 718.3         | 0.43                                            | HOMO( $\alpha$ ) $\rightarrow$ LUMO( $\alpha$ )   | 82%   |
|                                                   | S <sub>13</sub> | 405.2         | 0.38                                            | HOMO( $\beta$ ) $\rightarrow$ LUMO+3( $\beta$ )   | 38%   |
| SOMO( $\alpha$ ) $\rightarrow$ LUMO+3( $\alpha$ ) |                 |               |                                                 | 24%                                               |       |
| HOMO( $\alpha$ ) $\rightarrow$ LUMO+7( $\alpha$ ) |                 |               |                                                 | 23%                                               |       |
|                                                   | S <sub>18</sub> | 341.1         | 0.17                                            | HOMO-2( $\beta$ ) $\rightarrow$ SUMO( $\beta$ )   | 74%   |
| <b>2PB-b</b>                                      | S <sub>1</sub>  | 3863.6        | 0.12                                            | HOMO( $\beta$ ) $\rightarrow$ SUMO( $\beta$ )     | 98%   |
|                                                   | S <sub>3</sub>  | 637.8         | 0.14                                            | HOMO( $\alpha$ ) $\rightarrow$ LUMO( $\alpha$ )   | 85%   |
|                                                   | S <sub>7</sub>  | 517.5         | 0.06                                            | HOMO( $\beta$ ) $\rightarrow$ LUMO+1( $\beta$ )   | 22%   |
|                                                   |                 |               |                                                 | SOMO( $\alpha$ ) $\rightarrow$ LUMO+3( $\alpha$ ) | 16%   |
|                                                   | S <sub>9</sub>  | 500.3         | 0.10                                            | HOMO( $\alpha$ ) $\rightarrow$ LUMO+2( $\alpha$ ) | 47%   |
|                                                   |                 |               |                                                 | SOMO( $\alpha$ ) $\rightarrow$ LUMO+1( $\alpha$ ) | 12%   |
| S <sub>11</sub>                                   | 449.9           | 0.10          | HOMO( $\beta$ ) $\rightarrow$ LUMO+3( $\beta$ ) | 54%                                               |       |
|                                                   |                 |               | HOMO( $\beta$ ) $\rightarrow$ LUMO+1( $\beta$ ) | 18%                                               |       |
| <b>2PB-c</b>                                      | S <sub>1</sub>  | 1193.3        | 0.24                                            | HOMO( $\beta$ ) $\rightarrow$ SUMO( $\beta$ )     | 91%   |
|                                                   | S <sub>2</sub>  | 977.3         | 0.83                                            | HOMO( $\alpha$ ) $\rightarrow$ LUMO( $\alpha$ )   | 89%   |
|                                                   | S <sub>5</sub>  | 530.9         | 0.33                                            | HOMO( $\beta$ ) $\rightarrow$ LUMO+3( $\beta$ )   | 37%   |
|                                                   |                 |               |                                                 | HOMO( $\beta$ ) $\rightarrow$ LUMO+1( $\beta$ )   | 22%   |
|                                                   | S <sub>6</sub>  | 520.6         | 0.17                                            | HOMO( $\alpha$ ) $\rightarrow$ LUMO+2( $\alpha$ ) | 39%   |
|                                                   |                 |               |                                                 | HOMO( $\beta$ ) $\rightarrow$ LUMO+3( $\beta$ )   | 22%   |
| S <sub>15</sub>                                   | 399.7           | 0.09          | HOMO( $\beta$ ) $\rightarrow$ LUMO+1( $\beta$ ) | 32%                                               |       |



|              |                 |        |      |                                                   |     |
|--------------|-----------------|--------|------|---------------------------------------------------|-----|
|              |                 |        |      | HOMO( $\beta$ ) $\rightarrow$ LUMO+3( $\beta$ )   | 22% |
|              | S <sub>21</sub> | 328.0  | 0.27 | HOMO-2( $\beta$ ) $\rightarrow$ SUMO( $\beta$ )   | 40% |
|              |                 |        |      | HOMO-3( $\beta$ ) $\rightarrow$ LUMO( $\beta$ )   | 14% |
| <b>2PB-d</b> | S <sub>1</sub>  | 1294.2 | 0.21 | HOMO( $\beta$ ) $\rightarrow$ SUMO( $\beta$ )     | 93% |
|              | S <sub>2</sub>  | 848.0  | 0.30 | HOMO( $\alpha$ ) $\rightarrow$ LUMO( $\alpha$ )   | 86% |
|              | S <sub>5</sub>  | 504.4  | 0.08 | HOMO( $\alpha$ ) $\rightarrow$ LUMO+4( $\alpha$ ) | 28% |
|              |                 |        |      | HOMO( $\alpha$ ) $\rightarrow$ LUMO+2( $\alpha$ ) | 24% |
|              | S <sub>8</sub>  | 483.6  | 0.17 | HOMO( $\alpha$ ) $\rightarrow$ LUMO+4( $\alpha$ ) | 38% |
|              |                 |        |      | HOMO( $\beta$ ) $\rightarrow$ LUMO+1( $\beta$ )   | 26% |
|              | S <sub>17</sub> | 373.2  | 0.21 | HOMO( $\beta$ ) $\rightarrow$ LUMO+6( $\beta$ )   | 35% |
|              |                 |        |      | HOMO( $\beta$ ) $\rightarrow$ LUMO+4( $\beta$ )   | 12% |
|              | S <sub>19</sub> | 360.2  | 0.17 | HOMO( $\beta$ ) $\rightarrow$ LUMO+4( $\beta$ )   | 31% |
|              |                 |        |      | HOMO( $\beta$ ) $\rightarrow$ LUMO+3( $\beta$ )   | 12% |

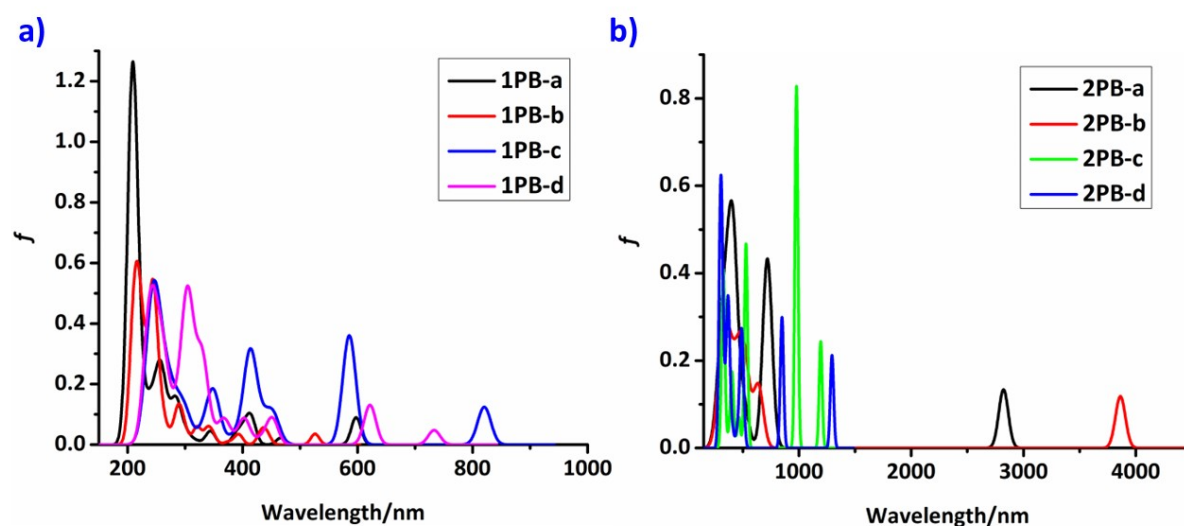

Figure S5. Calculated absorption spectra of the studied compounds at TD-DFT//U $\omega$ B97XD/6-31G(d).

Table S4 The molecular orbitals related to electronic configuration and the absorption transitions.

| 1PB-a            |                   |                    |                  |                    |
|------------------|-------------------|--------------------|------------------|--------------------|
|                  |                   |                    |                  |                    |
| SOMO( $\alpha$ ) | HOMO( $\alpha$ )  | HOMO-1( $\alpha$ ) | LUMO( $\alpha$ ) | LUMO+2( $\alpha$ ) |
|                  |                   |                    |                  |                    |
| HOMO( $\beta$ )  | HOMO-1( $\beta$ ) | SUMO( $\beta$ )    | LUMO( $\beta$ )  |                    |
| 1PB-b            |                   |                    |                  |                    |

|                                                                                     |                                                                                     |                                                                                     |                                                                                      |                                                                                       |
|-------------------------------------------------------------------------------------|-------------------------------------------------------------------------------------|-------------------------------------------------------------------------------------|--------------------------------------------------------------------------------------|---------------------------------------------------------------------------------------|
| 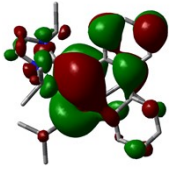   |    |    |    |    |
| SOMO( $\alpha$ )                                                                    | HOMO( $\alpha$ )                                                                    | HOMO-1( $\alpha$ )                                                                  | LUMO( $\alpha$ )                                                                     | LUMO+3( $\alpha$ )                                                                    |
|    |    |    |    |    |
| HOMO( $\beta$ )                                                                     | SUMO( $\beta$ )                                                                     | HOMO-1( $\beta$ )                                                                   | HOMO-2( $\beta$ )                                                                    | LUMO( $\beta$ )                                                                       |
| <b>1PB-c</b>                                                                        |                                                                                     |                                                                                     |                                                                                      |                                                                                       |
|    |    |    |    |    |
| SOMO( $\alpha$ )                                                                    | HOMO( $\alpha$ )                                                                    | HOMO-1( $\alpha$ )                                                                  | LUMO( $\alpha$ )                                                                     | LUMO+1( $\alpha$ )                                                                    |
|   |   |   |   |   |
| LUMO+2( $\alpha$ )                                                                  | LUMO+3( $\alpha$ )                                                                  | HOMO( $\beta$ )                                                                     | HOMO-1( $\beta$ )                                                                    | SUMO( $\beta$ )                                                                       |
|  |                                                                                     |                                                                                     |                                                                                      |                                                                                       |
| LUMO( $\beta$ )                                                                     |                                                                                     |                                                                                     |                                                                                      |                                                                                       |
| <b>1PB-d</b>                                                                        |                                                                                     |                                                                                     |                                                                                      |                                                                                       |
|  |  |  |  |  |
| SOMO( $\alpha$ )                                                                    | HOMO( $\alpha$ )                                                                    | HOMO-1( $\alpha$ )                                                                  | LUMO( $\alpha$ )                                                                     | LUMO+2( $\alpha$ )                                                                    |
|  |  |  |  |  |
| LUMO+6( $\alpha$ )                                                                  | HOMO-5( $\beta$ )                                                                   | HOMO-4( $\beta$ )                                                                   | HOMO-2( $\beta$ )                                                                    | HOMO-1( $\beta$ )                                                                     |
|  |  |  |                                                                                      |                                                                                       |
| HOMO( $\beta$ )                                                                     | SUMO( $\beta$ )                                                                     | LUMO( $\beta$ )                                                                     |                                                                                      |                                                                                       |

|                                                                                     |                                                                                     |                                                                                     |                                                                                      |                                                                                       |
|-------------------------------------------------------------------------------------|-------------------------------------------------------------------------------------|-------------------------------------------------------------------------------------|--------------------------------------------------------------------------------------|---------------------------------------------------------------------------------------|
| <b>2PB-a</b>                                                                        |                                                                                     |                                                                                     |                                                                                      |                                                                                       |
| 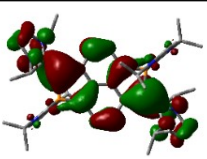   |    |    |    |    |
| SOMO( $\alpha$ )                                                                    | HOMO( $\alpha$ )                                                                    | HOMO-1( $\alpha$ )                                                                  | LUMO( $\alpha$ )                                                                     | LUMO+2( $\alpha$ )                                                                    |
|    |    |    |    |    |
| LUMO+3( $\alpha$ )                                                                  | LUMO+7( $\alpha$ )                                                                  | HOMO( $\beta$ )                                                                     | SUMO( $\beta$ )                                                                      | HOMO-1( $\beta$ )                                                                     |
|    |    |    |                                                                                      |                                                                                       |
| HOMO-2( $\beta$ )                                                                   | LUMO( $\beta$ )                                                                     | LUMO+3( $\beta$ )                                                                   |                                                                                      |                                                                                       |
| <b>2PB-b</b>                                                                        |                                                                                     |                                                                                     |                                                                                      |                                                                                       |
|   |   |   |   |   |
| SOMO( $\alpha$ )                                                                    | HOMO( $\alpha$ )                                                                    | HOMO-1( $\alpha$ )                                                                  | LUMO( $\alpha$ )                                                                     | LUMO+1( $\alpha$ )                                                                    |
|  |  |  |  |  |
| LUMO+2( $\alpha$ )                                                                  | LUMO+3( $\alpha$ )                                                                  | LUMO+4( $\alpha$ )                                                                  | HOMO( $\beta$ )                                                                      | SUMO( $\beta$ )                                                                       |
|  |  |  |  |                                                                                       |
| HOMO-1( $\beta$ )                                                                   | LUMO( $\beta$ )                                                                     | LUMO+1( $\beta$ )                                                                   | LUMO+3( $\beta$ )                                                                    |                                                                                       |
| <b>2PB-c</b>                                                                        |                                                                                     |                                                                                     |                                                                                      |                                                                                       |
|  |  |  |  |  |
| SOMO( $\alpha$ )                                                                    | HOMO( $\alpha$ )                                                                    | HOMO-1( $\alpha$ )                                                                  | LUMO( $\alpha$ )                                                                     | LUMO+2( $\alpha$ )                                                                    |
|  |  |  |  |  |
| LUMO+3( $\alpha$ )                                                                  | LUMO+9( $\alpha$ )                                                                  | HOMO-3( $\beta$ )                                                                   | HOMO-2( $\beta$ )                                                                    | SUMO( $\beta$ )                                                                       |

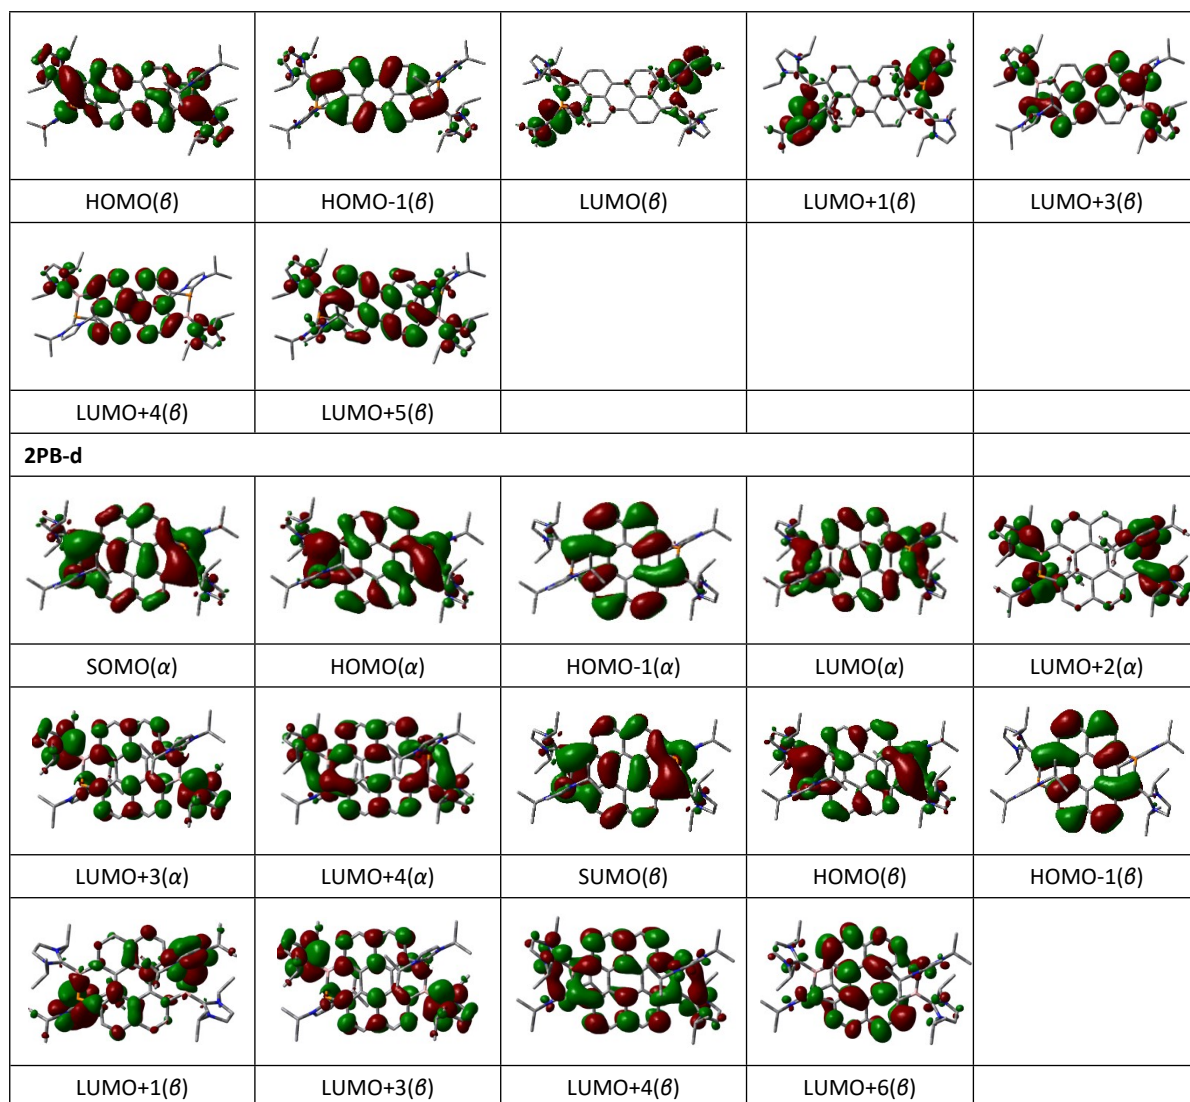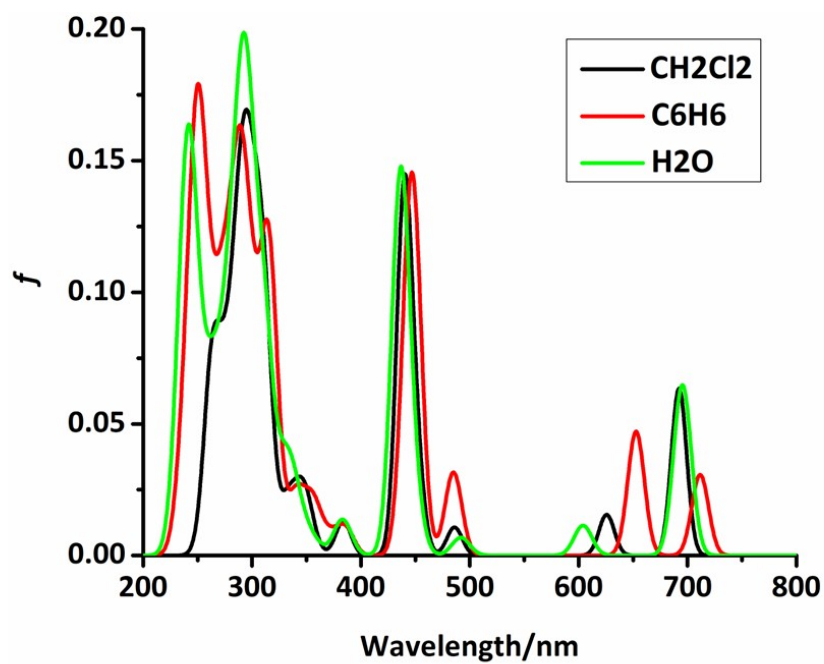

Figure S6. Calculated absorption spectra of the compound 1PB-a in different solvents.

## Coordinates of the studied molecules

### 1PB-a

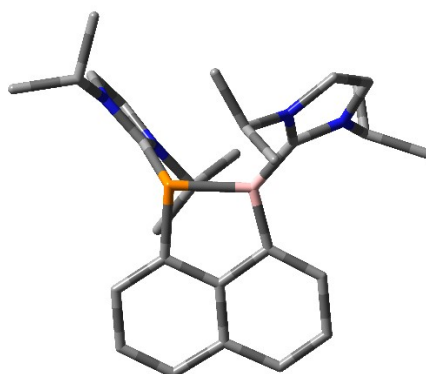

### UB3LYP/6-31G\*

| Center Number | Atomic Number | Atomic Type | Coordinates (Angstroms) |           |           |
|---------------|---------------|-------------|-------------------------|-----------|-----------|
|               |               |             | X                       | Y         | Z         |
| 1             | 6             | 0           | -3.167512               | 2.787044  | -2.133636 |
| 2             | 6             | 0           | -2.284025               | 3.827563  | -1.914207 |
| 3             | 6             | 0           | -0.979159               | 3.585382  | -1.409539 |
| 4             | 6             | 0           | -0.614175               | 2.242861  | -1.106308 |
| 5             | 6             | 0           | -1.534269               | 1.186929  | -1.345025 |
| 6             | 6             | 0           | -2.790664               | 1.450737  | -1.866710 |
| 7             | 6             | 0           | -0.010329               | 4.607506  | -1.199003 |
| 8             | 6             | 0           | 0.690329                | 1.892031  | -0.586673 |
| 9             | 1             | 0           | -3.484870               | 0.643320  | -2.086626 |
| 10            | 6             | 0           | 1.604665                | 2.947552  | -0.437965 |
| 11            | 6             | 0           | 1.251519                | 4.279396  | -0.735780 |
| 12            | 1             | 0           | 2.618161                | 2.745808  | -0.101725 |
| 13            | 1             | 0           | 1.990762                | 5.064567  | -0.599204 |
| 14            | 15            | 0           | -0.766577               | -0.457937 | -1.042264 |
| 15            | 6             | 0           | 4.142091                | -0.981273 | 0.932796  |
| 16            | 6             | 0           | 3.986997                | -1.752826 | -0.170556 |
| 17            | 6             | 0           | -2.980381               | -2.534072 | 1.627028  |
| 18            | 6             | 0           | -2.947649               | -1.357318 | 2.304355  |
| 19            | 6             | 0           | 2.203065                | -0.369360 | -0.057016 |
| 20            | 6             | 0           | -1.765010               | -1.083515 | 0.420118  |
| 21            | 1             | 0           | 4.624340                | -2.520697 | -0.578447 |
| 22            | 1             | 0           | 4.928546                | -0.968843 | 1.669991  |
| 23            | 7             | 0           | 2.799993                | -1.376358 | -0.773903 |
| 24            | 7             | 0           | 3.049177                | -0.134583 | 0.997563  |
| 25            | 6             | 0           | 2.390783                | -1.850639 | -2.119660 |
| 26            | 6             | 0           | 2.266085                | -3.376481 | -2.140205 |

|    |   |   |           |           |           |
|----|---|---|-----------|-----------|-----------|
| 27 | 6 | 0 | 3.353573  | -1.315044 | -3.185761 |
| 28 | 1 | 0 | 1.405094  | -1.416149 | -2.286655 |
| 29 | 1 | 0 | 1.581408  | -3.729842 | -1.362172 |
| 30 | 1 | 0 | 1.877389  | -3.695948 | -3.112128 |
| 31 | 1 | 0 | 3.233478  | -3.870695 | -1.996497 |
| 32 | 1 | 0 | 3.407708  | -0.222780 | -3.149239 |
| 33 | 1 | 0 | 4.364120  | -1.718388 | -3.056870 |
| 34 | 1 | 0 | 2.999956  | -1.606821 | -4.179751 |
| 35 | 6 | 0 | 2.776092  | 0.757326  | 2.149212  |
| 36 | 6 | 0 | 3.940383  | 1.725481  | 2.381297  |
| 37 | 6 | 0 | 2.461675  | -0.079673 | 3.395704  |
| 38 | 1 | 0 | 1.889798  | 1.325291  | 1.859221  |
| 39 | 1 | 0 | 4.179129  | 2.292220  | 1.477055  |
| 40 | 1 | 0 | 3.670986  | 2.436217  | 3.168720  |
| 41 | 1 | 0 | 4.845678  | 1.201692  | 2.708001  |
| 42 | 1 | 0 | 1.641162  | -0.778780 | 3.204034  |
| 43 | 1 | 0 | 3.333588  | -0.658369 | 3.719872  |
| 44 | 1 | 0 | 2.173043  | 0.577622  | 4.222162  |
| 45 | 1 | 0 | -3.395739 | -1.082090 | 3.245396  |
| 46 | 1 | 0 | -3.457539 | -3.468966 | 1.872819  |
| 47 | 7 | 0 | -2.193456 | -0.473728 | 1.559300  |
| 48 | 7 | 0 | -2.253225 | -2.355859 | 0.467841  |
| 49 | 6 | 0 | -1.948151 | 0.937626  | 1.973035  |
| 50 | 6 | 0 | -1.350455 | 0.978950  | 3.382492  |
| 51 | 6 | 0 | -3.238964 | 1.754062  | 1.859106  |
| 52 | 1 | 0 | -1.211964 | 1.316359  | 1.266094  |
| 53 | 1 | 0 | -0.457392 | 0.352199  | 3.457252  |
| 54 | 1 | 0 | -1.067937 | 2.009960  | 3.616453  |
| 55 | 1 | 0 | -2.067131 | 0.656642  | 4.145835  |
| 56 | 1 | 0 | -3.636755 | 1.725458  | 0.841977  |
| 57 | 1 | 0 | -4.005726 | 1.389974  | 2.552594  |
| 58 | 1 | 0 | -3.027754 | 2.797759  | 2.111364  |
| 59 | 6 | 0 | -2.085659 | -3.421563 | -0.560901 |
| 60 | 6 | 0 | -3.445741 | -3.804908 | -1.151087 |
| 61 | 6 | 0 | -1.326985 | -4.612798 | 0.030976  |
| 62 | 1 | 0 | -1.479916 | -2.957352 | -1.341314 |
| 63 | 1 | 0 | -3.955860 | -2.931022 | -1.567649 |
| 64 | 1 | 0 | -3.297837 | -4.529577 | -1.957672 |
| 65 | 1 | 0 | -4.100976 | -4.267995 | -0.405098 |
| 66 | 1 | 0 | -0.362935 | -4.303429 | 0.447675  |
| 67 | 1 | 0 | -1.899392 | -5.111173 | 0.821217  |
| 68 | 1 | 0 | -1.140824 | -5.350425 | -0.755753 |
| 69 | 5 | 0 | 0.875834  | 0.380241  | -0.381194 |
| 70 | 1 | 0 | -2.578011 | 4.848609  | -2.144548 |

|    |   |   |           |          |           |
|----|---|---|-----------|----------|-----------|
| 71 | 1 | 0 | -0.267080 | 5.639525 | -1.422119 |
| 72 | 1 | 0 | -4.155426 | 2.991813 | -2.536470 |

-----

**UWB97XD/6-31G\***

-----

| Center<br>Number | Atomic<br>Number | Atomic<br>Type | Coordinates (Angstroms) |           |           |
|------------------|------------------|----------------|-------------------------|-----------|-----------|
|                  |                  |                | X                       | Y         | Z         |
| 1                | 6                | 0              | -3.006421               | 2.968880  | -1.986652 |
| 2                | 6                | 0              | -2.030150               | 3.927879  | -1.835440 |
| 3                | 6                | 0              | -0.712959               | 3.573436  | -1.448602 |
| 4                | 6                | 0              | -0.437306               | 2.211596  | -1.191286 |
| 5                | 6                | 0              | -1.455439               | 1.238782  | -1.350058 |
| 6                | 6                | 0              | -2.719065               | 1.604865  | -1.759193 |
| 7                | 6                | 0              | 0.350829                | 4.508775  | -1.313455 |
| 8                | 6                | 0              | 0.864638                | 1.749004  | -0.778697 |
| 9                | 1                | 0              | -3.494829               | 0.858827  | -1.911015 |
| 10               | 6                | 0              | 1.870956                | 2.711187  | -0.705492 |
| 11               | 6                | 0              | 1.609042                | 4.072447  | -0.966032 |
| 12               | 1                | 0              | 2.887021                | 2.417464  | -0.457860 |
| 13               | 1                | 0              | 2.421259                | 4.789567  | -0.889544 |
| 14               | 15               | 0              | -0.837978               | -0.456739 | -1.038869 |
| 15               | 6                | 0              | 4.103583                | -1.344786 | 0.665649  |
| 16               | 6                | 0              | 3.775515                | -2.202736 | -0.325080 |
| 17               | 6                | 0              | -3.112932               | -1.930736 | 1.926042  |
| 18               | 6                | 0              | -2.760409               | -0.770543 | 2.529101  |
| 19               | 6                | 0              | 2.175385                | -0.625418 | -0.240116 |
| 20               | 6                | 0              | -1.755574               | -0.826705 | 0.540578  |
| 21               | 1                | 0              | 4.288242                | -3.078863 | -0.686481 |
| 22               | 1                | 0              | 4.948281                | -1.341669 | 1.335271  |
| 23               | 7                | 0              | 2.597572                | -1.750581 | -0.881081 |
| 24               | 7                | 0              | 3.118721                | -0.380112 | 0.711680  |
| 25               | 6                | 0              | 1.917795                | -2.391391 | -2.019154 |
| 26               | 6                | 0              | 1.104052                | -3.585819 | -1.527247 |
| 27               | 6                | 0              | 2.911579                | -2.763241 | -3.115785 |
| 28               | 1                | 0              | 1.240577                | -1.630522 | -2.411866 |
| 29               | 1                | 0              | 0.415894                | -3.281187 | -0.732224 |
| 30               | 1                | 0              | 0.518521                | -4.005851 | -2.350354 |
| 31               | 1                | 0              | 1.757967                | -4.372201 | -1.134469 |
| 32               | 1                | 0              | 3.522399                | -1.902680 | -3.401660 |
| 33               | 1                | 0              | 3.572899                | -3.582261 | -2.814399 |
| 34               | 1                | 0              | 2.359067                | -3.098756 | -3.997585 |
| 35               | 6                | 0              | 3.006346                | 0.606997  | 1.799022  |

|    |   |   |           |           |           |
|----|---|---|-----------|-----------|-----------|
| 36 | 6 | 0 | 4.262287  | 1.468801  | 1.888760  |
| 37 | 6 | 0 | 2.709178  | -0.118769 | 3.110704  |
| 38 | 1 | 0 | 2.154997  | 1.235664  | 1.530180  |
| 39 | 1 | 0 | 4.503489  | 1.930025  | 0.927865  |
| 40 | 1 | 0 | 4.105694  | 2.264475  | 2.622281  |
| 41 | 1 | 0 | 5.128833  | 0.884569  | 2.216455  |
| 42 | 1 | 0 | 1.842949  | -0.778219 | 3.000336  |
| 43 | 1 | 0 | 3.562227  | -0.726591 | 3.430143  |
| 44 | 1 | 0 | 2.500353  | 0.607634  | 3.901378  |
| 45 | 1 | 0 | -3.037364 | -0.371635 | 3.491280  |
| 46 | 1 | 0 | -3.751807 | -2.730210 | 2.264430  |
| 47 | 7 | 0 | -1.918409 | -0.103280 | 1.671413  |
| 48 | 7 | 0 | -2.485689 | -1.954592 | 0.702759  |
| 49 | 6 | 0 | -1.331276 | 1.223302  | 1.971932  |
| 50 | 6 | 0 | -0.700429 | 1.216142  | 3.361115  |
| 51 | 6 | 0 | -2.379964 | 2.319352  | 1.814916  |
| 52 | 1 | 0 | -0.542938 | 1.358942  | 1.233235  |
| 53 | 1 | 0 | -0.034341 | 0.360310  | 3.493280  |
| 54 | 1 | 0 | -0.115398 | 2.131782  | 3.485226  |
| 55 | 1 | 0 | -1.452391 | 1.201279  | 4.157050  |
| 56 | 1 | 0 | -2.821342 | 2.307095  | 0.816554  |
| 57 | 1 | 0 | -3.176308 | 2.212188  | 2.560109  |
| 58 | 1 | 0 | -1.904130 | 3.292673  | 1.963088  |
| 59 | 6 | 0 | -2.663371 | -3.046030 | -0.282650 |
| 60 | 6 | 0 | -4.087258 | -3.018309 | -0.829392 |
| 61 | 6 | 0 | -2.279189 | -4.385207 | 0.338510  |
| 62 | 1 | 0 | -1.969765 | -2.812137 | -1.091885 |
| 63 | 1 | 0 | -4.311811 | -2.047432 | -1.280492 |
| 64 | 1 | 0 | -4.198083 | -3.787811 | -1.598208 |
| 65 | 1 | 0 | -4.824265 | -3.218074 | -0.044350 |
| 66 | 1 | 0 | -1.270981 | -4.352097 | 0.761877  |
| 67 | 1 | 0 | -2.977467 | -4.687428 | 1.126027  |
| 68 | 1 | 0 | -2.301777 | -5.158075 | -0.434548 |
| 69 | 5 | 0 | 0.912459  | 0.228019  | -0.545061 |
| 70 | 1 | 0 | -2.259072 | 4.972257  | -2.029854 |
| 71 | 1 | 0 | 0.163384  | 5.561183  | -1.506132 |
| 72 | 1 | 0 | -4.004613 | 3.258169  | -2.300183 |

-----

**UM06-2X/6-31G\***

-----

| Center | Atomic | Atomic | Coordinates (Angstroms) |   |   |
|--------|--------|--------|-------------------------|---|---|
| Number | Number | Type   | X                       | Y | Z |

-----



|    |    |   |           |           |           |
|----|----|---|-----------|-----------|-----------|
| 1  | 6  | 0 | -2.383679 | 3.531054  | -1.880231 |
| 2  | 6  | 0 | -1.230131 | 4.272771  | -1.759068 |
| 3  | 6  | 0 | 0.002005  | 3.655853  | -1.419153 |
| 4  | 6  | 0 | 0.005832  | 2.263469  | -1.168347 |
| 5  | 6  | 0 | -1.192753 | 1.515991  | -1.299558 |
| 6  | 6  | 0 | -2.368158 | 2.132108  | -1.669991 |
| 7  | 6  | 0 | 1.238139  | 4.354479  | -1.333380 |
| 8  | 6  | 0 | 1.199787  | 1.544689  | -0.803265 |
| 9  | 1  | 0 | -3.280555 | 1.556693  | -1.806325 |
| 10 | 6  | 0 | 2.382212  | 2.279613  | -0.781129 |
| 11 | 6  | 0 | 2.394311  | 3.668472  | -1.041100 |
| 12 | 1  | 0 | 3.327818  | 1.783498  | -0.577937 |
| 13 | 1  | 0 | 3.339272  | 4.202297  | -1.006647 |
| 14 | 15 | 0 | -0.918166 | -0.279640 | -1.040672 |
| 15 | 6  | 0 | 3.864712  | -2.075511 | 0.506079  |
| 16 | 6  | 0 | 3.291458  | -2.904207 | -0.396944 |
| 17 | 6  | 0 | -3.434334 | -1.279703 | 1.939758  |
| 18 | 6  | 0 | -2.834657 | -0.227691 | 2.551723  |
| 19 | 6  | 0 | 2.032558  | -1.040099 | -0.293510 |
| 20 | 6  | 0 | -1.880413 | -0.475997 | 0.551456  |
| 21 | 1  | 0 | 3.595389  | -3.879175 | -0.741397 |
| 22 | 1  | 0 | 4.752356  | -2.201376 | 1.105505  |
| 23 | 7  | 0 | 2.175282  | -2.259881 | -0.886686 |
| 24 | 7  | 0 | 3.089173  | -0.936292 | 0.563782  |
| 25 | 6  | 0 | 1.251271  | -2.826253 | -1.882949 |
| 26 | 6  | 0 | 0.181326  | -3.648251 | -1.167657 |
| 27 | 6  | 0 | 2.000640  | -3.639527 | -2.932088 |
| 28 | 1  | 0 | 0.790018  | -1.963746 | -2.370041 |
| 29 | 1  | 0 | -0.301367 | -3.054936 | -0.383088 |
| 30 | 1  | 0 | -0.582210 | -3.977652 | -1.879103 |
| 31 | 1  | 0 | 0.626598  | -4.534103 | -0.702073 |
| 32 | 1  | 0 | 2.817025  | -3.061574 | -3.372222 |
| 33 | 1  | 0 | 2.403832  | -4.568470 | -2.517281 |
| 34 | 1  | 0 | 1.305830  | -3.914223 | -3.729384 |
| 35 | 6  | 0 | 3.238820  | 0.078483  | 1.623836  |
| 36 | 6  | 0 | 4.657245  | 0.637046  | 1.647318  |
| 37 | 6  | 0 | 2.843906  | -0.543467 | 2.961920  |
| 38 | 1  | 0 | 2.535184  | 0.873080  | 1.367352  |
| 39 | 1  | 0 | 4.961494  | 1.009126  | 0.666192  |
| 40 | 1  | 0 | 4.710281  | 1.461894  | 2.362402  |
| 41 | 1  | 0 | 5.378765  | -0.121699 | 1.967116  |
| 42 | 1  | 0 | 1.852441  | -1.000625 | 2.893267  |
| 43 | 1  | 0 | 3.558775  | -1.317259 | 3.259758  |
| 44 | 1  | 0 | 2.827518  | 0.221622  | 3.743099  |

|    |   |   |           |           |           |
|----|---|---|-----------|-----------|-----------|
| 45 | 1 | 0 | -3.008313 | 0.210945  | 3.521603  |
| 46 | 1 | 0 | -4.228177 | -1.927876 | 2.275460  |
| 47 | 7 | 0 | -1.877238 | 0.252086  | 1.689937  |
| 48 | 7 | 0 | -2.834562 | -1.422917 | 0.710641  |
| 49 | 6 | 0 | -1.013096 | 1.417528  | 1.997249  |
| 50 | 6 | 0 | -0.383276 | 1.244298  | 3.375465  |
| 51 | 6 | 0 | -1.808514 | 2.713077  | 1.884241  |
| 52 | 1 | 0 | -0.228185 | 1.396000  | 1.241603  |
| 53 | 1 | 0 | 0.089012  | 0.264467  | 3.478357  |
| 54 | 1 | 0 | 0.380049  | 2.014865  | 3.513284  |
| 55 | 1 | 0 | -1.117834 | 1.366599  | 4.177795  |
| 56 | 1 | 0 | -2.251173 | 2.823727  | 0.892196  |
| 57 | 1 | 0 | -2.602381 | 2.748977  | 2.638442  |
| 58 | 1 | 0 | -1.137593 | 3.559094  | 2.056443  |
| 59 | 6 | 0 | -3.270710 | -2.422002 | -0.295056 |
| 60 | 6 | 0 | -4.618324 | -2.003344 | -0.872220 |
| 61 | 6 | 0 | -3.292049 | -3.815596 | 0.322001  |
| 62 | 1 | 0 | -2.515238 | -2.381869 | -1.081452 |
| 63 | 1 | 0 | -4.554213 | -1.011359 | -1.327754 |
| 64 | 1 | 0 | -4.925798 | -2.717130 | -1.640565 |
| 65 | 1 | 0 | -5.391162 | -1.984374 | -0.097079 |
| 66 | 1 | 0 | -2.331995 | -4.062631 | 0.783420  |
| 67 | 1 | 0 | -4.079038 | -3.914046 | 1.076260  |
| 68 | 1 | 0 | -3.497686 | -4.548822 | -0.462000 |
| 69 | 5 | 0 | 0.948240  | 0.037161  | -0.564529 |
| 70 | 1 | 0 | -1.247480 | 5.343361  | -1.944497 |
| 71 | 1 | 0 | 1.259366  | 5.423523  | -1.523826 |
| 72 | 1 | 0 | -3.312705 | 4.017297  | -2.160255 |

-----

**UBP86/6-31G\***

| Center<br>Number | Atomic<br>Number | Atomic<br>Type | Coordinates (Angstroms) |          |           |
|------------------|------------------|----------------|-------------------------|----------|-----------|
|                  |                  |                | X                       | Y        | Z         |
| 1                | 6                | 0              | -3.019394               | 2.990298 | -2.103376 |
| 2                | 6                | 0              | -2.057334               | 3.976297 | -1.900734 |
| 3                | 6                | 0              | -0.760229               | 3.647421 | -1.407493 |
| 4                | 6                | 0              | -0.482808               | 2.275277 | -1.094866 |
| 5                | 6                | 0              | -1.480088               | 1.280054 | -1.319202 |
| 6                | 6                | 0              | -2.731361               | 1.626826 | -1.831991 |
| 7                | 6                | 0              | 0.283937                | 4.604238 | -1.215638 |
| 8                | 6                | 0              | 0.805457                | 1.836983 | -0.585676 |
| 9                | 1                | 0              | -3.485954               | 0.859926 | -2.042088 |

|    |    |   |           |           |           |
|----|----|---|-----------|-----------|-----------|
| 10 | 6  | 0 | 1.800480  | 2.833298  | -0.458400 |
| 11 | 6  | 0 | 1.535811  | 4.189346  | -0.764050 |
| 12 | 1  | 0 | 2.810408  | 2.558916  | -0.132290 |
| 13 | 1  | 0 | 2.335965  | 4.928777  | -0.643775 |
| 14 | 15 | 0 | -0.812686 | -0.415870 | -1.024125 |
| 15 | 6  | 0 | 4.107086  | -1.247225 | 0.888197  |
| 16 | 6  | 0 | 3.863595  | -2.040073 | -0.198404 |
| 17 | 6  | 0 | -3.143003 | -2.351509 | 1.664792  |
| 18 | 6  | 0 | -3.003332 | -1.179110 | 2.359044  |
| 19 | 6  | 0 | 2.165311  | -0.531670 | -0.061149 |
| 20 | 6  | 0 | -1.833361 | -0.975817 | 0.439848  |
| 21 | 1  | 0 | 4.440622  | -2.863966 | -0.609335 |
| 22 | 1  | 0 | 4.921612  | -1.269755 | 1.607434  |
| 23 | 7  | 0 | 2.675703  | -1.605015 | -0.771284 |
| 24 | 7  | 0 | 3.069798  | -0.327049 | 0.965552  |
| 25 | 6  | 0 | 2.198778  | -2.052233 | -2.110940 |
| 26 | 6  | 0 | 2.253342  | -3.581498 | -2.229002 |
| 27 | 6  | 0 | 2.993191  | -1.336104 | -3.215553 |
| 28 | 1  | 0 | 1.145924  | -1.730642 | -2.159917 |
| 29 | 1  | 0 | 1.721767  | -4.073201 | -1.396291 |
| 30 | 1  | 0 | 1.772782  | -3.885983 | -3.173899 |
| 31 | 1  | 0 | 3.289430  | -3.963176 | -2.257001 |
| 32 | 1  | 0 | 2.907862  | -0.241260 | -3.113516 |
| 33 | 1  | 0 | 4.062245  | -1.612017 | -3.181864 |
| 34 | 1  | 0 | 2.597186  | -1.622201 | -4.204919 |
| 35 | 6  | 0 | 2.878729  | 0.599491  | 2.112580  |
| 36 | 6  | 0 | 4.114949  | 1.489073  | 2.311940  |
| 37 | 6  | 0 | 2.528681  | -0.202671 | 3.377918  |
| 38 | 1  | 0 | 2.019059  | 1.226511  | 1.821959  |
| 39 | 1  | 0 | 4.382514  | 2.028578  | 1.388492  |
| 40 | 1  | 0 | 3.906746  | 2.234584  | 3.097791  |
| 41 | 1  | 0 | 4.992977  | 0.903436  | 2.638068  |
| 42 | 1  | 0 | 1.652819  | -0.851913 | 3.206963  |
| 43 | 1  | 0 | 3.372206  | -0.840455 | 3.696435  |
| 44 | 1  | 0 | 2.298678  | 0.487135  | 4.207784  |
| 45 | 1  | 0 | -3.412717 | -0.877403 | 3.319614  |
| 46 | 1  | 0 | -3.690241 | -3.257327 | 1.912420  |
| 47 | 7  | 0 | -2.193988 | -0.345445 | 1.604640  |
| 48 | 7  | 0 | -2.425679 | -2.215846 | 0.487556  |
| 49 | 6  | 0 | -1.829450 | 1.044830  | 2.015140  |
| 50 | 6  | 0 | -1.242424 | 1.041124  | 3.434139  |
| 51 | 6  | 0 | -3.047589 | 1.970785  | 1.883249  |
| 52 | 1  | 0 | -1.047853 | 1.350726  | 1.302595  |
| 53 | 1  | 0 | -0.401880 | 0.333297  | 3.523432  |

|    |   |   |           |           |           |
|----|---|---|-----------|-----------|-----------|
| 54 | 1 | 0 | -0.869761 | 2.052815  | 3.666616  |
| 55 | 1 | 0 | -1.998577 | 0.788783  | 4.198627  |
| 56 | 1 | 0 | -3.438331 | 1.971452  | 0.853364  |
| 57 | 1 | 0 | -3.855353 | 1.673819  | 2.576286  |
| 58 | 1 | 0 | -2.747976 | 3.001898  | 2.135278  |
| 59 | 6 | 0 | -2.354430 | -3.277543 | -0.561629 |
| 60 | 6 | 0 | -3.756668 | -3.570574 | -1.114763 |
| 61 | 6 | 0 | -1.647971 | -4.522821 | -0.006142 |
| 62 | 1 | 0 | -1.738301 | -2.826726 | -1.358561 |
| 63 | 1 | 0 | -4.232577 | -2.654872 | -1.503590 |
| 64 | 1 | 0 | -3.675918 | -4.293819 | -1.943651 |
| 65 | 1 | 0 | -4.418802 | -4.013573 | -0.349828 |
| 66 | 1 | 0 | -0.645998 | -4.275889 | 0.384340  |
| 67 | 1 | 0 | -2.229304 | -4.998563 | 0.803682  |
| 68 | 1 | 0 | -1.532737 | -5.266974 | -0.812191 |
| 69 | 5 | 0 | 0.891031  | 0.309577  | -0.373181 |
| 70 | 1 | 0 | -2.285020 | 5.022119  | -2.138405 |
| 71 | 1 | 0 | 0.094893  | 5.659069  | -1.444551 |
| 72 | 1 | 0 | -4.003541 | 3.262564  | -2.500020 |

1PB-b

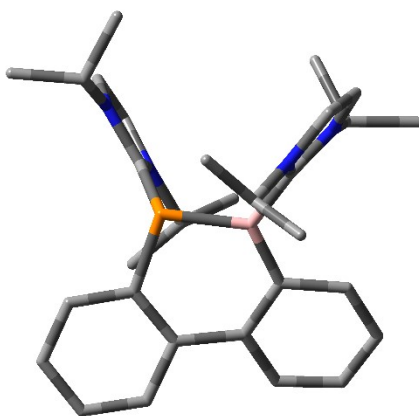

UB3LYP/6-31G\*

| Center<br>Number | Atomic<br>Number | Atomic<br>Type | Coordinates (Angstroms) |           |           |
|------------------|------------------|----------------|-------------------------|-----------|-----------|
|                  |                  |                | X                       | Y         | Z         |
| 1                | 6                | 0              | -0.261907               | -4.346388 | 1.160568  |
| 2                | 6                | 0              | -0.785904               | -3.155488 | 0.687283  |
| 3                | 6                | 0              | 0.001003                | -2.156545 | 0.044835  |
| 4                | 6                | 0              | 1.380253                | -2.482979 | -0.213984 |
| 5                | 6                | 0              | 1.898845                | -3.674837 | 0.333798  |
| 6                | 6                | 0              | 1.108465                | -4.592819 | 1.016324  |
| 7                | 6                | 0              | 2.270300                | -1.639854 | -1.063576 |

|    |    |   |           |           |           |
|----|----|---|-----------|-----------|-----------|
| 8  | 6  | 0 | 2.015385  | -0.282469 | -1.404314 |
| 9  | 6  | 0 | 2.939990  | 0.436412  | -2.185867 |
| 10 | 1  | 0 | 2.711001  | 1.466069  | -2.451594 |
| 11 | 6  | 0 | 4.119421  | -0.137787 | -2.642886 |
| 12 | 6  | 0 | 4.357650  | -1.484297 | -2.360244 |
| 13 | 6  | 0 | 3.446694  | -2.211127 | -1.605115 |
| 14 | 1  | 0 | -0.904133 | -5.072897 | 1.651433  |
| 15 | 1  | 0 | -1.849906 | -2.972562 | 0.815102  |
| 16 | 1  | 0 | 1.554364  | -5.498396 | 1.416942  |
| 17 | 1  | 0 | 4.820027  | 0.439603  | -3.238841 |
| 18 | 1  | 0 | 5.244842  | -1.977734 | -2.747047 |
| 19 | 15 | 0 | 0.445346  | 0.595208  | -1.040503 |
| 20 | 6  | 0 | 1.792248  | 2.668820  | 2.256879  |
| 21 | 6  | 0 | 1.180221  | 3.649563  | 1.543961  |
| 22 | 1  | 0 | 2.310677  | 2.712923  | 3.201143  |
| 23 | 1  | 0 | 1.065246  | 4.700247  | 1.756560  |
| 24 | 6  | 0 | -4.321108 | -0.104420 | -0.800710 |
| 25 | 6  | 0 | -4.268431 | -0.147677 | 0.555024  |
| 26 | 1  | 0 | -5.156375 | 0.063578  | -1.461559 |
| 27 | 1  | 0 | -5.047324 | -0.015349 | 1.288584  |
| 28 | 6  | 0 | 0.970324  | 1.733118  | 0.391363  |
| 29 | 6  | 0 | -2.186183 | -0.533994 | -0.220765 |
| 30 | 7  | 0 | 1.651035  | 1.494453  | 1.544790  |
| 31 | 7  | 0 | 0.680548  | 3.065814  | 0.396177  |
| 32 | 7  | 0 | -3.041516 | -0.346000 | -1.266163 |
| 33 | 7  | 0 | -2.955269 | -0.415267 | 0.901273  |
| 34 | 6  | 0 | -2.691488 | -0.496665 | -2.702564 |
| 35 | 6  | 0 | -2.944834 | 0.809715  | -3.458145 |
| 36 | 6  | 0 | -3.430989 | -1.695555 | -3.305344 |
| 37 | 1  | 0 | -1.619353 | -0.707734 | -2.699997 |
| 38 | 1  | 0 | -2.384963 | 1.636288  | -3.010301 |
| 39 | 1  | 0 | -2.617520 | 0.698913  | -4.496501 |
| 40 | 1  | 0 | -4.008892 | 1.072524  | -3.472376 |
| 41 | 1  | 0 | -3.222045 | -2.609926 | -2.741836 |
| 42 | 1  | 0 | -4.515144 | -1.537541 | -3.325472 |
| 43 | 1  | 0 | -3.097859 | -1.846423 | -4.336826 |
| 44 | 6  | 0 | -2.449988 | -0.460489 | 2.295056  |
| 45 | 6  | 0 | -3.254879 | -1.454039 | 3.137687  |
| 46 | 6  | 0 | -2.439632 | 0.948478  | 2.899357  |
| 47 | 1  | 0 | -1.423660 | -0.823352 | 2.201820  |
| 48 | 1  | 0 | -3.262950 | -2.448428 | 2.682831  |
| 49 | 1  | 0 | -2.801050 | -1.537901 | 4.129965  |
| 50 | 1  | 0 | -4.291004 | -1.126547 | 3.277788  |
| 51 | 1  | 0 | -1.842953 | 1.634838  | 2.289604  |

|    |   |   |           |           |           |
|----|---|---|-----------|-----------|-----------|
| 52 | 1 | 0 | -3.453420 | 1.355055  | 2.985023  |
| 53 | 1 | 0 | -2.008104 | 0.917437  | 3.905174  |
| 54 | 6 | 0 | 2.224663  | 0.193048  | 1.986945  |
| 55 | 6 | 0 | 1.780292  | -0.130468 | 3.416214  |
| 56 | 6 | 0 | 3.747747  | 0.208961  | 1.826579  |
| 57 | 1 | 0 | 1.797107  | -0.549352 | 1.316819  |
| 58 | 1 | 0 | 0.690984  | -0.088600 | 3.515009  |
| 59 | 1 | 0 | 2.104723  | -1.145087 | 3.665121  |
| 60 | 1 | 0 | 2.223695  | 0.547320  | 4.154076  |
| 61 | 1 | 0 | 4.032934  | 0.428048  | 0.794174  |
| 62 | 1 | 0 | 4.212706  | 0.949703  | 2.487343  |
| 63 | 1 | 0 | 4.148742  | -0.774553 | 2.089757  |
| 64 | 6 | 0 | -0.032755 | 3.831578  | -0.664745 |
| 65 | 6 | 0 | 0.880489  | 4.918961  | -1.238180 |
| 66 | 6 | 0 | -1.356205 | 4.380116  | -0.123790 |
| 67 | 1 | 0 | -0.238164 | 3.093536  | -1.442362 |
| 68 | 1 | 0 | 1.817364  | 4.492759  | -1.609928 |
| 69 | 1 | 0 | 0.374280  | 5.411081  | -2.074377 |
| 70 | 1 | 0 | 1.119540  | 5.689375  | -0.496820 |
| 71 | 1 | 0 | -1.990638 | 3.575813  | 0.262817  |
| 72 | 1 | 0 | -1.198605 | 5.111744  | 0.676537  |
| 73 | 1 | 0 | -1.897559 | 4.884287  | -0.930430 |
| 74 | 5 | 0 | -0.631561 | -0.810581 | -0.320349 |
| 75 | 1 | 0 | 2.955444  | -3.896464 | 0.236398  |
| 76 | 1 | 0 | 3.643850  | -3.265730 | -1.456865 |

-----

**UWB97XD/6-31G\***

| Center<br>Number | Atomic<br>Number | Atomic<br>Type | Coordinates (Angstroms) |           |           |
|------------------|------------------|----------------|-------------------------|-----------|-----------|
|                  |                  |                | X                       | Y         | Z         |
| 1                | 6                | 0              | -1.422382               | -4.083165 | -0.981541 |
| 2                | 6                | 0              | -0.493410               | -3.195408 | -0.474855 |
| 3                | 6                | 0              | -0.854842               | -1.984551 | 0.169152  |
| 4                | 6                | 0              | -2.248882               | -1.754724 | 0.393018  |
| 5                | 6                | 0              | -3.172703               | -2.642689 | -0.182393 |
| 6                | 6                | 0              | -2.780620               | -3.784519 | -0.866219 |
| 7                | 6                | 0              | -2.764708               | -0.604641 | 1.195556  |
| 8                | 6                | 0              | -2.019446               | 0.558072  | 1.503628  |
| 9                | 6                | 0              | -2.616090               | 1.617645  | 2.202710  |
| 10               | 1                | 0              | -2.014926               | 2.491507  | 2.442102  |
| 11               | 6                | 0              | -3.940891               | 1.570278  | 2.605506  |
| 12               | 6                | 0              | -4.668398               | 0.409794  | 2.358900  |

|    |    |   |           |           |           |
|----|----|---|-----------|-----------|-----------|
| 13 | 6  | 0 | -4.083534 | -0.651404 | 1.686316  |
| 14 | 1  | 0 | -1.098760 | -4.994069 | -1.476499 |
| 15 | 1  | 0 | 0.563456  | -3.430881 | -0.579835 |
| 16 | 1  | 0 | -3.530337 | -4.443220 | -1.292564 |
| 17 | 1  | 0 | -4.386884 | 2.405242  | 3.135944  |
| 18 | 1  | 0 | -5.692159 | 0.320411  | 2.708722  |
| 19 | 15 | 0 | -0.234309 | 0.751625  | 1.180034  |
| 20 | 6  | 0 | -0.563222 | 2.787581  | -2.343791 |
| 21 | 6  | 0 | 0.455896  | 3.444345  | -1.739720 |
| 22 | 1  | 0 | -1.031331 | 2.953527  | -3.300327 |
| 23 | 1  | 0 | 1.043605  | 4.282000  | -2.076618 |
| 24 | 6  | 0 | 3.977406  | -1.372676 | 0.551003  |
| 25 | 6  | 0 | 3.735127  | -1.440924 | -0.779173 |
| 26 | 1  | 0 | 4.905442  | -1.426614 | 1.096923  |
| 27 | 1  | 0 | 4.413295  | -1.557691 | -1.609073 |
| 28 | 6  | 0 | -0.223597 | 1.821510  | -0.363440 |
| 29 | 6  | 0 | 1.761510  | -1.203401 | 0.259905  |
| 30 | 7  | 0 | -0.962344 | 1.783402  | -1.493787 |
| 31 | 7  | 0 | 0.650716  | 2.844662  | -0.515931 |
| 32 | 7  | 0 | 2.757058  | -1.232108 | 1.176474  |
| 33 | 7  | 0 | 2.369934  | -1.337581 | -0.944762 |
| 34 | 6  | 0 | 2.561426  | -1.177092 | 2.637661  |
| 35 | 6  | 0 | 3.114439  | 0.131353  | 3.193107  |
| 36 | 6  | 0 | 3.162384  | -2.414238 | 3.298398  |
| 37 | 1  | 0 | 1.475806  | -1.195884 | 2.769450  |
| 38 | 1  | 0 | 2.620435  | 0.987867  | 2.725400  |
| 39 | 1  | 0 | 2.933121  | 0.179105  | 4.270341  |
| 40 | 1  | 0 | 4.195174  | 0.209520  | 3.029242  |
| 41 | 1  | 0 | 2.762100  | -3.328981 | 2.852712  |
| 42 | 1  | 0 | 4.254388  | -2.430631 | 3.214782  |
| 43 | 1  | 0 | 2.912452  | -2.412822 | 4.362740  |
| 44 | 6  | 0 | 1.686044  | -1.238483 | -2.245789 |
| 45 | 6  | 0 | 2.021125  | -2.434365 | -3.129946 |
| 46 | 6  | 0 | 2.021105  | 0.098925  | -2.901757 |
| 47 | 1  | 0 | 0.621585  | -1.266562 | -2.001421 |
| 48 | 1  | 0 | 1.790476  | -3.374979 | -2.623520 |
| 49 | 1  | 0 | 1.425394  | -2.385658 | -4.045648 |
| 50 | 1  | 0 | 3.076674  | -2.442144 | -3.422202 |
| 51 | 1  | 0 | 1.748438  | 0.932389  | -2.247785 |
| 52 | 1  | 0 | 3.089760  | 0.173644  | -3.130288 |
| 53 | 1  | 0 | 1.470758  | 0.202914  | -3.841534 |
| 54 | 6  | 0 | -2.054726 | 0.831421  | -1.791136 |
| 55 | 6  | 0 | -1.911698 | 0.269079  | -3.201242 |
| 56 | 6  | 0 | -3.410375 | 1.484009  | -1.544981 |

|    |   |   |           |           |           |
|----|---|---|-----------|-----------|-----------|
| 57 | 1 | 0 | -1.912131 | 0.011233  | -1.094140 |
| 58 | 1 | 0 | -0.905730 | -0.124497 | -3.372958 |
| 59 | 1 | 0 | -2.620359 | -0.555225 | -3.316617 |
| 60 | 1 | 0 | -2.137367 | 1.010992  | -3.974538 |
| 61 | 1 | 0 | -3.482339 | 1.868945  | -0.524574 |
| 62 | 1 | 0 | -3.589075 | 2.303581  | -2.249998 |
| 63 | 1 | 0 | -4.197462 | 0.737293  | -1.681795 |
| 64 | 6 | 0 | 1.727032  | 3.207509  | 0.433863  |
| 65 | 6 | 0 | 1.925389  | 4.718173  | 0.481570  |
| 66 | 6 | 0 | 3.003330  | 2.451045  | 0.072485  |
| 67 | 1 | 0 | 1.369077  | 2.864021  | 1.406879  |
| 68 | 1 | 0 | 0.980166  | 5.239706  | 0.655717  |
| 69 | 1 | 0 | 2.602316  | 4.957406  | 1.305842  |
| 70 | 1 | 0 | 2.382565  | 5.105825  | -0.434823 |
| 71 | 1 | 0 | 2.837501  | 1.369238  | 0.090995  |
| 72 | 1 | 0 | 3.356721  | 2.731901  | -0.925743 |
| 73 | 1 | 0 | 3.791242  | 2.688016  | 0.793271  |
| 74 | 5 | 0 | 0.230571  | -0.971601 | 0.535527  |
| 75 | 1 | 0 | -4.235220 | -2.438283 | -0.115020 |
| 76 | 1 | 0 | -4.669765 | -1.553892 | 1.563572  |

-----

**UM06-2X/6-31G\***

| Center<br>Number | Atomic<br>Number | Atomic<br>Type | Coordinates (Angstroms) |           |           |
|------------------|------------------|----------------|-------------------------|-----------|-----------|
|                  |                  |                | X                       | Y         | Z         |
| 1                | 6                | 0              | -1.444707               | -4.083700 | -1.002074 |
| 2                | 6                | 0              | -0.510537               | -3.188464 | -0.515304 |
| 3                | 6                | 0              | -0.867020               | -1.984377 | 0.142248  |
| 4                | 6                | 0              | -2.256520               | -1.758642 | 0.389787  |
| 5                | 6                | 0              | -3.187806               | -2.653523 | -0.165338 |
| 6                | 6                | 0              | -2.802581               | -3.794718 | -0.854697 |
| 7                | 6                | 0              | -2.761812               | -0.601983 | 1.189387  |
| 8                | 6                | 0              | -2.008404               | 0.557313  | 1.497119  |
| 9                | 6                | 0              | -2.598500               | 1.621030  | 2.197140  |
| 10               | 1                | 0              | -1.989377               | 2.489989  | 2.435507  |
| 11               | 6                | 0              | -3.924350               | 1.583789  | 2.599922  |
| 12               | 6                | 0              | -4.660489               | 0.427373  | 2.352850  |
| 13               | 6                | 0              | -4.082291               | -0.638376 | 1.680697  |
| 14               | 1                | 0              | -1.126080               | -4.991330 | -1.505603 |
| 15               | 1                | 0              | 0.546999                | -3.414025 | -0.644716 |
| 16               | 1                | 0              | -3.556835               | -4.458505 | -1.263957 |
| 17               | 1                | 0              | -4.364296               | 2.422040  | 3.129799  |



|    |    |   |           |           |           |
|----|----|---|-----------|-----------|-----------|
| 18 | 1  | 0 | -5.684621 | 0.344687  | 2.702589  |
| 19 | 15 | 0 | -0.218040 | 0.748890  | 1.175724  |
| 20 | 6  | 0 | -0.604520 | 2.790483  | -2.352058 |
| 21 | 6  | 0 | 0.416948  | 3.459955  | -1.759169 |
| 22 | 1  | 0 | -1.086346 | 2.947345  | -3.304188 |
| 23 | 1  | 0 | 0.992458  | 4.304363  | -2.101647 |
| 24 | 6  | 0 | 3.975011  | -1.364165 | 0.597153  |
| 25 | 6  | 0 | 3.752765  | -1.464334 | -0.736683 |
| 26 | 1  | 0 | 4.894981  | -1.399436 | 1.159230  |
| 27 | 1  | 0 | 4.443825  | -1.594846 | -1.554429 |
| 28 | 6  | 0 | -0.234275 | 1.833165  | -0.370713 |
| 29 | 6  | 0 | 1.760426  | -1.222053 | 0.269033  |
| 30 | 7  | 0 | -0.984254 | 1.787412  | -1.492510 |
| 31 | 7  | 0 | 0.628655  | 2.864223  | -0.536046 |
| 32 | 7  | 0 | 2.743726  | -1.222755 | 1.201055  |
| 33 | 7  | 0 | 2.388880  | -1.379986 | -0.922866 |
| 34 | 6  | 0 | 2.537368  | -1.136301 | 2.661693  |
| 35 | 6  | 0 | 3.060364  | 0.196991  | 3.184288  |
| 36 | 6  | 0 | 3.178241  | -2.335912 | 3.352027  |
| 37 | 1  | 0 | 1.452238  | -1.181624 | 2.791491  |
| 38 | 1  | 0 | 2.534559  | 1.030727  | 2.710066  |
| 39 | 1  | 0 | 2.897595  | 0.257736  | 4.263416  |
| 40 | 1  | 0 | 4.135356  | 0.297674  | 2.997597  |
| 41 | 1  | 0 | 2.814736  | -3.274168 | 2.925854  |
| 42 | 1  | 0 | 4.269714  | -2.310498 | 3.270856  |
| 43 | 1  | 0 | 2.925088  | -2.317654 | 4.414822  |
| 44 | 6  | 0 | 1.726887  | -1.294265 | -2.239076 |
| 45 | 6  | 0 | 2.176744  | -2.435054 | -3.143060 |
| 46 | 6  | 0 | 1.987367  | 0.082481  | -2.844839 |
| 47 | 1  | 0 | 0.660597  | -1.405372 | -2.025957 |
| 48 | 1  | 0 | 2.017508  | -3.403887 | -2.662830 |
| 49 | 1  | 0 | 1.596971  | -2.411281 | -4.069191 |
| 50 | 1  | 0 | 3.233810  | -2.345360 | -3.413314 |
| 51 | 1  | 0 | 1.612846  | 0.872129  | -2.184206 |
| 52 | 1  | 0 | 3.059062  | 0.242799  | -3.005407 |
| 53 | 1  | 0 | 1.484479  | 0.169993  | -3.812342 |
| 54 | 6  | 0 | -2.063196 | 0.813208  | -1.772017 |
| 55 | 6  | 0 | -1.927094 | 0.259499  | -3.185195 |
| 56 | 6  | 0 | -3.427755 | 1.438580  | -1.509351 |
| 57 | 1  | 0 | -1.887631 | -0.000888 | -1.074454 |
| 58 | 1  | 0 | -0.914280 | -0.111542 | -3.369063 |
| 59 | 1  | 0 | -2.621411 | -0.577365 | -3.295961 |
| 60 | 1  | 0 | -2.176566 | 1.002927  | -3.949093 |
| 61 | 1  | 0 | -3.494313 | 1.826727  | -0.489442 |

|    |   |   |           |           |           |
|----|---|---|-----------|-----------|-----------|
| 62 | 1 | 0 | -3.628313 | 2.250585  | -2.216814 |
| 63 | 1 | 0 | -4.200280 | 0.674720  | -1.635573 |
| 64 | 6 | 0 | 1.721277  | 3.225299  | 0.398559  |
| 65 | 6 | 0 | 2.009899  | 4.719847  | 0.342145  |
| 66 | 6 | 0 | 2.951925  | 2.379443  | 0.081625  |
| 67 | 1 | 0 | 1.343747  | 2.965426  | 1.390482  |
| 68 | 1 | 0 | 1.098352  | 5.309386  | 0.469546  |
| 69 | 1 | 0 | 2.696924  | 4.974317  | 1.152505  |
| 70 | 1 | 0 | 2.494725  | 5.007095  | -0.596071 |
| 71 | 1 | 0 | 2.724616  | 1.310131  | 0.161921  |
| 72 | 1 | 0 | 3.308213  | 2.585467  | -0.933670 |
| 73 | 1 | 0 | 3.756765  | 2.614377  | 0.784027  |
| 74 | 5 | 0 | 0.225597  | -0.976530 | 0.513490  |
| 75 | 1 | 0 | -4.249374 | -2.453600 | -0.077970 |
| 76 | 1 | 0 | -4.673080 | -1.537760 | 1.558858  |

-----

**UBP86/6-31G\***

| Center<br>Number | Atomic<br>Number | Atomic<br>Type | Coordinates (Angstroms) |           |           |
|------------------|------------------|----------------|-------------------------|-----------|-----------|
|                  |                  |                | X                       | Y         | Z         |
| 1                | 6                | 0              | 0.249820                | -4.412764 | -0.997953 |
| 2                | 6                | 0              | 0.780080                | -3.199320 | -0.565854 |
| 3                | 6                | 0              | -0.011186               | -2.163868 | 0.027127  |
| 4                | 6                | 0              | -1.403346               | -2.472347 | 0.287354  |
| 5                | 6                | 0              | -1.928273               | -3.688111 | -0.221392 |
| 6                | 6                | 0              | -1.132336               | -4.643591 | -0.860982 |
| 7                | 6                | 0              | -2.292983               | -1.592794 | 1.100562  |
| 8                | 6                | 0              | -2.029688               | -0.217126 | 1.395896  |
| 9                | 6                | 0              | -2.957306               | 0.540736  | 2.150063  |
| 10               | 1                | 0              | -2.717906               | 1.586249  | 2.380951  |
| 11               | 6                | 0              | -4.150441               | -0.012400 | 2.623448  |
| 12               | 6                | 0              | -4.397033               | -1.375089 | 2.388775  |
| 13               | 6                | 0              | -3.481576               | -2.139433 | 1.661843  |
| 14               | 1                | 0              | 0.897785                | -5.170734 | -1.452421 |
| 15               | 1                | 0              | 1.856610                | -3.025710 | -0.685273 |
| 16               | 1                | 0              | -1.584289               | -5.568637 | -1.234057 |
| 17               | 1                | 0              | -4.856001               | 0.596032  | 3.198866  |
| 18               | 1                | 0              | -5.295656               | -1.852701 | 2.794134  |
| 19               | 15               | 0              | -0.446995               | 0.639887  | 1.007228  |
| 20               | 6                | 0              | -1.757737               | 2.583907  | -2.391262 |
| 21               | 6                | 0              | -1.153692               | 3.601782  | -1.702044 |
| 22               | 1                | 0              | -2.266387               | 2.589064  | -3.351912 |

|    |   |   |           |           |           |
|----|---|---|-----------|-----------|-----------|
| 23 | 1 | 0 | -1.035536 | 4.652391  | -1.954776 |
| 24 | 6 | 0 | 4.325462  | -0.062989 | 0.855119  |
| 25 | 6 | 0 | 4.302107  | -0.208894 | -0.505807 |
| 26 | 1 | 0 | 5.153019  | 0.152684  | 1.526219  |
| 27 | 1 | 0 | 5.102935  | -0.132222 | -1.236714 |
| 28 | 6 | 0 | -0.955282 | 1.718047  | -0.465627 |
| 29 | 6 | 0 | 2.187637  | -0.536313 | 0.256757  |
| 30 | 7 | 0 | -1.623430 | 1.433922  | -1.629553 |
| 31 | 7 | 0 | -0.668461 | 3.062001  | -0.520841 |
| 32 | 7 | 0 | 3.030675  | -0.269473 | 1.310412  |
| 33 | 7 | 0 | 2.991440  | -0.502687 | -0.860529 |
| 34 | 6 | 0 | 2.645103  | -0.324548 | 2.749173  |
| 35 | 6 | 0 | 2.858711  | 1.040589  | 3.416326  |
| 36 | 6 | 0 | 3.388999  | -1.468820 | 3.455102  |
| 37 | 1 | 0 | 1.565512  | -0.555533 | 2.728004  |
| 38 | 1 | 0 | 2.288510  | 1.827345  | 2.894634  |
| 39 | 1 | 0 | 2.508033  | 0.997239  | 4.461227  |
| 40 | 1 | 0 | 3.925942  | 1.326538  | 3.433826  |
| 41 | 1 | 0 | 3.211554  | -2.431581 | 2.947519  |
| 42 | 1 | 0 | 4.477770  | -1.287109 | 3.496786  |
| 43 | 1 | 0 | 3.025048  | -1.555006 | 4.492826  |
| 44 | 6 | 0 | 2.507601  | -0.635092 | -2.261472 |
| 45 | 6 | 0 | 3.335536  | -1.673931 | -3.031331 |
| 46 | 6 | 0 | 2.499284  | 0.740846  | -2.947677 |
| 47 | 1 | 0 | 1.471861  | -1.001585 | -2.156047 |
| 48 | 1 | 0 | 3.347558  | -2.646328 | -2.512193 |
| 49 | 1 | 0 | 2.893306  | -1.824932 | -4.030438 |
| 50 | 1 | 0 | 4.378592  | -1.342241 | -3.179931 |
| 51 | 1 | 0 | 1.881056  | 1.461269  | -2.385087 |
| 52 | 1 | 0 | 3.520260  | 1.152252  | -3.038165 |
| 53 | 1 | 0 | 2.084922  | 0.647930  | -3.966301 |
| 54 | 6 | 0 | -2.193101 | 0.109960  | -2.020074 |
| 55 | 6 | 0 | -1.755278 | -0.263228 | -3.443617 |
| 56 | 6 | 0 | -3.719294 | 0.125786  | -1.848029 |
| 57 | 1 | 0 | -1.749295 | -0.608463 | -1.315277 |
| 58 | 1 | 0 | -0.658785 | -0.214723 | -3.554582 |
| 59 | 1 | 0 | -2.074784 | -1.297469 | -3.652936 |
| 60 | 1 | 0 | -2.216474 | 0.386032  | -4.209064 |
| 61 | 1 | 0 | -3.999932 | 0.382630  | -0.813732 |
| 62 | 1 | 0 | -4.195254 | 0.845788  | -2.537998 |
| 63 | 1 | 0 | -4.120755 | -0.876193 | -2.074033 |
| 64 | 6 | 0 | 0.024626  | 3.867009  | 0.529668  |
| 65 | 6 | 0 | -0.909629 | 4.965508  | 1.057797  |
| 66 | 6 | 0 | 1.355230  | 4.411576  | -0.009827 |

|    |   |   |           |           |           |
|----|---|---|-----------|-----------|-----------|
| 67 | 1 | 0 | 0.222402  | 3.139240  | 1.335592  |
| 68 | 1 | 0 | -1.856742 | 4.540343  | 1.430038  |
| 69 | 1 | 0 | -0.416882 | 5.490807  | 1.893289  |
| 70 | 1 | 0 | -1.143527 | 5.718000  | 0.283897  |
| 71 | 1 | 0 | 2.006454  | 3.596462  | -0.368670 |
| 72 | 1 | 0 | 1.201520  | 5.126632  | -0.837627 |
| 73 | 1 | 0 | 1.885380  | 4.946601  | 0.796206  |
| 74 | 5 | 0 | 0.632561  | -0.803971 | 0.345808  |
| 75 | 1 | 0 | -2.997809 | -3.897115 | -0.126084 |
| 76 | 1 | 0 | -3.681566 | -3.208552 | 1.553033  |

1PB-c

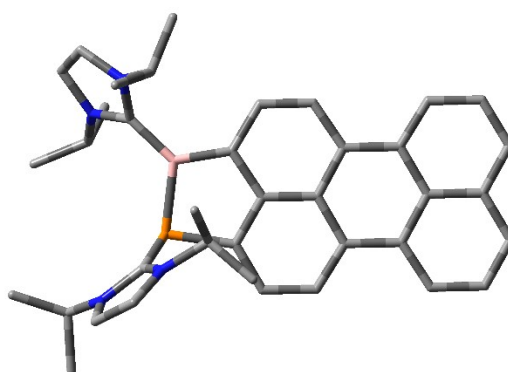

UB3LYP/6-31G\*

| Center Number | Atomic Number | Atomic Type | Coordinates (Angstroms) |           |           |
|---------------|---------------|-------------|-------------------------|-----------|-----------|
|               |               |             | X                       | Y         | Z         |
| 1             | 6             | 0           | 2.275004                | 2.369979  | 0.071090  |
| 2             | 6             | 0           | 3.070836                | 1.227242  | -0.138992 |
| 3             | 6             | 0           | 2.400095                | -0.006509 | -0.432984 |
| 4             | 6             | 0           | 0.976658                | -0.026919 | -0.463244 |
| 5             | 6             | 0           | 0.168252                | 1.146021  | -0.192789 |
| 6             | 6             | 0           | 0.885291                | 2.339889  | 0.041769  |
| 7             | 6             | 0           | 3.120278                | -1.212137 | -0.705971 |
| 8             | 6             | 0           | 0.285603                | -1.217384 | -0.794843 |
| 9             | 1             | 0           | 0.348110                | 3.272977  | 0.191582  |
| 10            | 6             | 0           | 0.996017                | -2.373428 | -1.092607 |
| 11            | 6             | 0           | 2.394254                | -2.366716 | -1.028936 |
| 12            | 1             | 0           | 0.481711                | -3.284886 | -1.388049 |
| 13            | 6             | 0           | 6.651874                | 2.423976  | 0.256821  |
| 14            | 6             | 0           | 7.366283                | 1.271797  | 0.009010  |
| 15            | 6             | 0           | 6.691945                | 0.061315  | -0.294130 |
| 16            | 6             | 0           | 5.258395                | 0.039677  | -0.345286 |
| 17            | 6             | 0           | 4.529518                | 1.250159  | -0.087232 |

|    |    |   |           |           |           |
|----|----|---|-----------|-----------|-----------|
| 18 | 6  | 0 | 5.249600  | 2.411125  | 0.210494  |
| 19 | 1  | 0 | 7.169114  | 3.350168  | 0.490337  |
| 20 | 6  | 0 | 7.419691  | -1.128477 | -0.546338 |
| 21 | 6  | 0 | 4.589789  | -1.189449 | -0.652282 |
| 22 | 6  | 0 | 5.357786  | -2.330252 | -0.887415 |
| 23 | 6  | 0 | 6.760521  | -2.302720 | -0.836918 |
| 24 | 1  | 0 | 7.319870  | -3.213800 | -1.028604 |
| 25 | 1  | 0 | 4.877329  | -3.274743 | -1.116289 |
| 26 | 1  | 0 | 2.915107  | -3.287216 | -1.265543 |
| 27 | 1  | 0 | 4.725985  | 3.337965  | 0.415712  |
| 28 | 1  | 0 | 2.753633  | 3.324525  | 0.261003  |
| 29 | 15 | 0 | -1.519455 | -0.934482 | -0.943353 |
| 30 | 6  | 0 | -3.519837 | -3.503309 | 1.447458  |
| 31 | 6  | 0 | -2.582988 | -3.113570 | 2.350276  |
| 32 | 1  | 0 | -4.329371 | -4.209059 | 1.540594  |
| 33 | 1  | 0 | -2.427754 | -3.422922 | 3.371208  |
| 34 | 6  | 0 | -4.189093 | 3.309519  | -0.881614 |
| 35 | 6  | 0 | -3.770581 | 3.713249  | 0.342751  |
| 36 | 1  | 0 | -4.977198 | 3.692495  | -1.509632 |
| 37 | 1  | 0 | -4.139427 | 4.499148  | 0.981864  |
| 38 | 6  | 0 | -2.194457 | -1.991484 | 0.449393  |
| 39 | 6  | 0 | -2.456293 | 1.986347  | -0.289047 |
| 40 | 7  | 0 | -1.777007 | -2.179853 | 1.731379  |
| 41 | 7  | 0 | -3.271377 | -2.810841 | 0.279795  |
| 42 | 7  | 0 | -2.708426 | 2.901242  | 0.700564  |
| 43 | 7  | 0 | -3.382842 | 2.252146  | -1.264719 |
| 44 | 6  | 0 | -0.616575 | -1.529080 | 2.404690  |
| 45 | 6  | 0 | 0.512748  | -2.542625 | 2.611171  |
| 46 | 6  | 0 | -1.065304 | -0.876699 | 3.715640  |
| 47 | 1  | 0 | -0.290321 | -0.750848 | 1.716564  |
| 48 | 1  | 0 | 0.829704  | -2.981216 | 1.662159  |
| 49 | 1  | 0 | 1.375103  | -2.034724 | 3.053831  |
| 50 | 1  | 0 | 0.210150  | -3.345863 | 3.292937  |
| 51 | 1  | 0 | -1.904199 | -0.193453 | 3.556161  |
| 52 | 1  | 0 | -1.357538 | -1.617381 | 4.468147  |
| 53 | 1  | 0 | -0.229349 | -0.304752 | 4.129893  |
| 54 | 6  | 0 | -4.073822 | -2.991800 | -0.962817 |
| 55 | 6  | 0 | -5.521409 | -2.551935 | -0.725903 |
| 56 | 6  | 0 | -3.955411 | -4.434052 | -1.463783 |
| 57 | 1  | 0 | -3.607009 | -2.325546 | -1.690797 |
| 58 | 1  | 0 | -5.569637 | -1.518764 | -0.366631 |
| 59 | 1  | 0 | -6.078019 | -2.615514 | -1.666058 |
| 60 | 1  | 0 | -6.029844 | -3.193425 | 0.002455  |
| 61 | 1  | 0 | -2.909144 | -4.711510 | -1.624208 |

|    |   |   |           |           |           |
|----|---|---|-----------|-----------|-----------|
| 62 | 1 | 0 | -4.402342 | -5.149450 | -0.764689 |
| 63 | 1 | 0 | -4.483240 | -4.529240 | -2.417685 |
| 64 | 6 | 0 | -3.399370 | 1.673234  | -2.631772 |
| 65 | 6 | 0 | -2.889133 | 2.701290  | -3.648068 |
| 66 | 6 | 0 | -4.790936 | 1.134299  | -2.973707 |
| 67 | 1 | 0 | -2.699115 | 0.838519  | -2.594931 |
| 68 | 1 | 0 | -1.888254 | 3.051955  | -3.378722 |
| 69 | 1 | 0 | -2.834814 | 2.241411  | -4.639903 |
| 70 | 1 | 0 | -3.556010 | 3.568063  | -3.715424 |
| 71 | 1 | 0 | -5.132580 | 0.412215  | -2.224797 |
| 72 | 1 | 0 | -5.536507 | 1.934168  | -3.044781 |
| 73 | 1 | 0 | -4.756884 | 0.632339  | -3.945624 |
| 74 | 6 | 0 | -2.066877 | 2.936295  | 2.036290  |
| 75 | 6 | 0 | -3.062738 | 2.472210  | 3.106721  |
| 76 | 6 | 0 | -1.501349 | 4.327774  | 2.336928  |
| 77 | 1 | 0 | -1.244396 | 2.221062  | 1.968496  |
| 78 | 1 | 0 | -3.471323 | 1.485830  | 2.864140  |
| 79 | 1 | 0 | -2.562532 | 2.412093  | 4.078566  |
| 80 | 1 | 0 | -3.899408 | 3.172400  | 3.206472  |
| 81 | 1 | 0 | -0.815481 | 4.660912  | 1.553263  |
| 82 | 1 | 0 | -2.295652 | 5.075468  | 2.440746  |
| 83 | 1 | 0 | -0.951258 | 4.300050  | 3.282668  |
| 84 | 5 | 0 | -1.328206 | 0.908412  | -0.309099 |
| 85 | 1 | 0 | 8.452384  | 1.273040  | 0.042804  |
| 86 | 1 | 0 | 8.505237  | -1.097288 | -0.505517 |

-----

**UWB97XD/6-31G\***

-----

| Center<br>Number | Atomic<br>Number | Atomic<br>Type | Coordinates (Angstroms) |           |           |
|------------------|------------------|----------------|-------------------------|-----------|-----------|
|                  |                  |                | X                       | Y         | Z         |
| 1                | 6                | 0              | 2.223042                | 2.394606  | -0.197366 |
| 2                | 6                | 0              | 3.007172                | 1.244517  | -0.315394 |
| 3                | 6                | 0              | 2.337787                | 0.000832  | -0.548540 |
| 4                | 6                | 0              | 0.925067                | -0.012078 | -0.609384 |
| 5                | 6                | 0              | 0.121589                | 1.171105  | -0.414413 |
| 6                | 6                | 0              | 0.830920                | 2.368335  | -0.248178 |
| 7                | 6                | 0              | 3.049564                | -1.221188 | -0.730044 |
| 8                | 6                | 0              | 0.231654                | -1.213009 | -0.874659 |
| 9                | 1                | 0              | 0.294078                | 3.309404  | -0.167739 |
| 10               | 6                | 0              | 0.931011                | -2.382275 | -1.094112 |
| 11               | 6                | 0              | 2.328341                | -2.380138 | -1.005916 |
| 12               | 1                | 0              | 0.413147                | -3.307341 | -1.334147 |

|    |    |   |           |           |           |
|----|----|---|-----------|-----------|-----------|
| 13 | 6  | 0 | 6.585360  | 2.430902  | 0.095356  |
| 14 | 6  | 0 | 7.290085  | 1.264961  | -0.054476 |
| 15 | 6  | 0 | 6.611469  | 0.044888  | -0.295668 |
| 16 | 6  | 0 | 5.189611  | 0.032150  | -0.386994 |
| 17 | 6  | 0 | 4.469143  | 1.259919  | -0.228656 |
| 18 | 6  | 0 | 5.184069  | 2.424525  | 0.010837  |
| 19 | 1  | 0 | 7.103714  | 3.366220  | 0.281189  |
| 20 | 6  | 0 | 7.334890  | -1.162839 | -0.444850 |
| 21 | 6  | 0 | 4.520097  | -1.206941 | -0.631825 |
| 22 | 6  | 0 | 5.275260  | -2.360553 | -0.763255 |
| 23 | 6  | 0 | 6.676380  | -2.342921 | -0.672507 |
| 24 | 1  | 0 | 7.230148  | -3.269546 | -0.784383 |
| 25 | 1  | 0 | 4.793945  | -3.315569 | -0.940154 |
| 26 | 1  | 0 | 2.844887  | -3.316707 | -1.179185 |
| 27 | 1  | 0 | 4.666217  | 3.367954  | 0.140536  |
| 28 | 1  | 0 | 2.700548  | 3.358474  | -0.060247 |
| 29 | 15 | 0 | -1.574758 | -0.963396 | -0.964853 |
| 30 | 6  | 0 | -3.154468 | -3.400828 | 1.808735  |
| 31 | 6  | 0 | -2.234780 | -2.798155 | 2.599180  |
| 32 | 1  | 0 | -3.864325 | -4.181404 | 2.029270  |
| 33 | 1  | 0 | -1.994220 | -2.957969 | 3.637565  |
| 34 | 6  | 0 | -4.315039 | 3.212140  | -0.950157 |
| 35 | 6  | 0 | -3.768500 | 3.735077  | 0.169509  |
| 36 | 1  | 0 | -5.177947 | 3.523169  | -1.515606 |
| 37 | 1  | 0 | -4.073150 | 4.578961  | 0.767003  |
| 38 | 6  | 0 | -2.079518 | -1.885370 | 0.571976  |
| 39 | 6  | 0 | -2.509386 | 1.975720  | -0.438724 |
| 40 | 7  | 0 | -1.584983 | -1.861896 | 1.830443  |
| 41 | 7  | 0 | -3.050438 | -2.828236 | 0.562892  |
| 42 | 7  | 0 | -2.661392 | 2.971812  | 0.476475  |
| 43 | 7  | 0 | -3.532400 | 2.139343  | -1.321028 |
| 44 | 6  | 0 | -0.492759 | -1.001333 | 2.342165  |
| 45 | 6  | 0 | 0.795135  | -1.803715 | 2.493824  |
| 46 | 6  | 0 | -0.919375 | -0.333231 | 3.645756  |
| 47 | 1  | 0 | -0.360484 | -0.230824 | 1.584404  |
| 48 | 1  | 0 | 1.080684  | -2.279275 | 1.553674  |
| 49 | 1  | 0 | 1.603372  | -1.129501 | 2.790446  |
| 50 | 1  | 0 | 0.691857  | -2.572873 | 3.267648  |
| 51 | 1  | 0 | -1.895735 | 0.147068  | 3.547245  |
| 52 | 1  | 0 | -0.959879 | -1.041409 | 4.480092  |
| 53 | 1  | 0 | -0.182154 | 0.431773  | 3.905316  |
| 54 | 6  | 0 | -3.858070 | -3.257392 | -0.601700 |
| 55 | 6  | 0 | -5.345468 | -3.137137 | -0.285540 |
| 56 | 6  | 0 | -3.440836 | -4.661600 | -1.027536 |

|    |   |   |           |           |           |
|----|---|---|-----------|-----------|-----------|
| 57 | 1 | 0 | -3.601109 | -2.556453 | -1.397645 |
| 58 | 1 | 0 | -5.597846 | -2.130322 | 0.060137  |
| 59 | 1 | 0 | -5.922145 | -3.344000 | -1.191157 |
| 60 | 1 | 0 | -5.661872 | -3.856236 | 0.477298  |
| 61 | 1 | 0 | -2.372746 | -4.695505 | -1.261099 |
| 62 | 1 | 0 | -3.651597 | -5.399027 | -0.245761 |
| 63 | 1 | 0 | -3.997396 | -4.952186 | -1.922706 |
| 64 | 6 | 0 | -3.771176 | 1.308278  | -2.513140 |
| 65 | 6 | 0 | -4.093536 | 2.170946  | -3.729684 |
| 66 | 6 | 0 | -4.856016 | 0.276900  | -2.213216 |
| 67 | 1 | 0 | -2.825568 | 0.794187  | -2.695809 |
| 68 | 1 | 0 | -3.330611 | 2.939436  | -3.880475 |
| 69 | 1 | 0 | -4.119710 | 1.535741  | -4.619180 |
| 70 | 1 | 0 | -5.072139 | 2.655035  | -3.645848 |
| 71 | 1 | 0 | -4.593874 | -0.310162 | -1.327184 |
| 72 | 1 | 0 | -5.821347 | 0.762303  | -2.032120 |
| 73 | 1 | 0 | -4.968816 | -0.406013 | -3.060368 |
| 74 | 6 | 0 | -1.914353 | 3.102342  | 1.739419  |
| 75 | 6 | 0 | -2.822986 | 2.714573  | 2.905368  |
| 76 | 6 | 0 | -1.345095 | 4.509222  | 1.896571  |
| 77 | 1 | 0 | -1.093625 | 2.386157  | 1.662078  |
| 78 | 1 | 0 | -3.270852 | 1.730486  | 2.737167  |
| 79 | 1 | 0 | -2.246659 | 2.684767  | 3.834516  |
| 80 | 1 | 0 | -3.632786 | 3.440086  | 3.036171  |
| 81 | 1 | 0 | -0.748920 | 4.801442  | 1.028772  |
| 82 | 1 | 0 | -2.138718 | 5.251401  | 2.034515  |
| 83 | 1 | 0 | -0.703687 | 4.544655  | 2.781447  |
| 84 | 5 | 0 | -1.377503 | 0.907680  | -0.479376 |
| 85 | 1 | 0 | 8.374376  | 1.258708  | 0.010056  |
| 86 | 1 | 0 | 8.418606  | -1.137135 | -0.374108 |

-----

**UM06-2X/6-31G\***

-----

| Center<br>Number | Atomic<br>Number | Atomic<br>Type | Coordinates (Angstroms) |           |           |
|------------------|------------------|----------------|-------------------------|-----------|-----------|
|                  |                  |                | X                       | Y         | Z         |
| 1                | 6                | 0              | 2.259174                | 2.385663  | -0.272616 |
| 2                | 6                | 0              | 3.028177                | 1.225146  | -0.349025 |
| 3                | 6                | 0              | 2.344011                | -0.019072 | -0.527926 |
| 4                | 6                | 0              | 0.929221                | -0.017784 | -0.582316 |
| 5                | 6                | 0              | 0.140859                | 1.178339  | -0.425139 |
| 6                | 6                | 0              | 0.862381                | 2.370692  | -0.309844 |
| 7                | 6                | 0              | 3.042665                | -1.255864 | -0.674625 |



|    |    |   |           |           |           |
|----|----|---|-----------|-----------|-----------|
| 8  | 6  | 0 | 0.221930  | -1.219257 | -0.822554 |
| 9  | 1  | 0 | 0.336455  | 3.321139  | -0.265219 |
| 10 | 6  | 0 | 0.909377  | -2.399871 | -1.015891 |
| 11 | 6  | 0 | 2.309308  | -2.412811 | -0.920961 |
| 12 | 1  | 0 | 0.381625  | -3.322869 | -1.243833 |
| 13 | 6  | 0 | 6.625137  | 2.388896  | -0.023337 |
| 14 | 6  | 0 | 7.316164  | 1.209603  | -0.130654 |
| 15 | 6  | 0 | 6.621720  | -0.012137 | -0.313832 |
| 16 | 6  | 0 | 5.198946  | -0.012853 | -0.392936 |
| 17 | 6  | 0 | 4.493359  | 1.228287  | -0.278021 |
| 18 | 6  | 0 | 5.221248  | 2.393776  | -0.093573 |
| 19 | 1  | 0 | 7.154520  | 3.325428  | 0.118195  |
| 20 | 6  | 0 | 7.331677  | -1.233843 | -0.416676 |
| 21 | 6  | 0 | 4.513980  | -1.254402 | -0.581395 |
| 22 | 6  | 0 | 5.254560  | -2.421455 | -0.666011 |
| 23 | 6  | 0 | 6.658392  | -2.415775 | -0.586411 |
| 24 | 1  | 0 | 7.200530  | -3.352664 | -0.660817 |
| 25 | 1  | 0 | 4.758912  | -3.376776 | -0.794210 |
| 26 | 1  | 0 | 2.817370  | -3.357563 | -1.073464 |
| 27 | 1  | 0 | 4.712053  | 3.345727  | 0.003038  |
| 28 | 1  | 0 | 2.748685  | 3.348705  | -0.180972 |
| 29 | 15 | 0 | -1.582010 | -0.948507 | -0.963253 |
| 30 | 6  | 0 | -3.199538 | -3.386793 | 1.801920  |
| 31 | 6  | 0 | -2.298035 | -2.768661 | 2.605725  |
| 32 | 1  | 0 | -3.905634 | -4.173897 | 2.013752  |
| 33 | 1  | 0 | -2.073337 | -2.916277 | 3.650200  |
| 34 | 6  | 0 | -4.276867 | 3.273677  | -0.986106 |
| 35 | 6  | 0 | -3.648007 | 3.873201  | 0.051378  |
| 36 | 1  | 0 | -5.160092 | 3.565500  | -1.530476 |
| 37 | 1  | 0 | -3.890685 | 4.776391  | 0.588425  |
| 38 | 6  | 0 | -2.117978 | -1.866163 | 0.574480  |
| 39 | 6  | 0 | -2.477525 | 2.023093  | -0.470201 |
| 40 | 7  | 0 | -1.645337 | -1.832191 | 1.840038  |
| 41 | 7  | 0 | -3.079765 | -2.818656 | 0.555215  |
| 42 | 7  | 0 | -2.547079 | 3.102347  | 0.360942  |
| 43 | 7  | 0 | -3.549492 | 2.146281  | -1.303193 |
| 44 | 6  | 0 | -0.569224 | -0.955881 | 2.363264  |
| 45 | 6  | 0 | 0.718884  | -1.749253 | 2.550794  |
| 46 | 6  | 0 | -1.030284 | -0.289763 | 3.655567  |
| 47 | 1  | 0 | -0.429187 | -0.191802 | 1.598637  |
| 48 | 1  | 0 | 1.036208  | -2.221188 | 1.618689  |
| 49 | 1  | 0 | 1.511465  | -1.070607 | 2.877603  |
| 50 | 1  | 0 | 0.592300  | -2.519885 | 3.319296  |
| 51 | 1  | 0 | -2.008837 | 0.181074  | 3.535112  |

|    |   |   |           |           |           |
|----|---|---|-----------|-----------|-----------|
| 52 | 1 | 0 | -1.082719 | -1.002065 | 4.485134  |
| 53 | 1 | 0 | -0.305188 | 0.479939  | 3.933403  |
| 54 | 6 | 0 | -3.843947 | -3.283663 | -0.627437 |
| 55 | 6 | 0 | -5.336573 | -3.296246 | -0.318831 |
| 56 | 6 | 0 | -3.313492 | -4.642847 | -1.069801 |
| 57 | 1 | 0 | -3.637969 | -2.547488 | -1.406196 |
| 58 | 1 | 0 | -5.674939 | -2.326090 | 0.055348  |
| 59 | 1 | 0 | -5.887525 | -3.524882 | -1.234678 |
| 60 | 1 | 0 | -5.592920 | -4.064545 | 0.417358  |
| 61 | 1 | 0 | -2.247625 | -4.584604 | -1.306971 |
| 62 | 1 | 0 | -3.458888 | -5.396442 | -0.289136 |
| 63 | 1 | 0 | -3.848859 | -4.972401 | -1.963772 |
| 64 | 6 | 0 | -3.901151 | 1.194517  | -2.370032 |
| 65 | 6 | 0 | -4.477933 | 1.914235  | -3.583736 |
| 66 | 6 | 0 | -4.856084 | 0.141687  | -1.812024 |
| 67 | 1 | 0 | -2.958127 | 0.722566  | -2.656054 |
| 68 | 1 | 0 | -3.818952 | 2.720105  | -3.916235 |
| 69 | 1 | 0 | -4.584147 | 1.198168  | -4.402191 |
| 70 | 1 | 0 | -5.471263 | 2.326073  | -3.380378 |
| 71 | 1 | 0 | -4.437495 | -0.321068 | -0.911346 |
| 72 | 1 | 0 | -5.816825 | 0.596902  | -1.548392 |
| 73 | 1 | 0 | -5.035815 | -0.639339 | -2.557239 |
| 74 | 6 | 0 | -1.760251 | 3.291444  | 1.594519  |
| 75 | 6 | 0 | -2.636589 | 2.946443  | 2.797079  |
| 76 | 6 | 0 | -1.208047 | 4.710212  | 1.676520  |
| 77 | 1 | 0 | -0.935649 | 2.579094  | 1.524822  |
| 78 | 1 | 0 | -3.079551 | 1.953787  | 2.675412  |
| 79 | 1 | 0 | -2.039982 | 2.957625  | 3.713460  |
| 80 | 1 | 0 | -3.447725 | 3.672734  | 2.911459  |
| 81 | 1 | 0 | -0.646440 | 4.977950  | 0.778558  |
| 82 | 1 | 0 | -2.010392 | 5.442512  | 1.812805  |
| 83 | 1 | 0 | -0.541127 | 4.789853  | 2.538736  |
| 84 | 5 | 0 | -1.371019 | 0.932035  | -0.486873 |
| 85 | 1 | 0 | 8.400795  | 1.191336  | -0.076095 |
| 86 | 1 | 0 | 8.416053  | -1.214292 | -0.355612 |

-----

**UBP86/6-31G\***

| Center<br>Number | Atomic<br>Number | Atomic<br>Type | Coordinates (Angstroms) |          |           |
|------------------|------------------|----------------|-------------------------|----------|-----------|
|                  |                  |                | X                       | Y        | Z         |
| 1                | 6                | 0              | 2.278217                | 2.381767 | 0.030976  |
| 2                | 6                | 0              | 3.077368                | 1.225092 | -0.156694 |

|    |    |   |           |           |           |
|----|----|---|-----------|-----------|-----------|
| 3  | 6  | 0 | 2.401744  | -0.018117 | -0.427029 |
| 4  | 6  | 0 | 0.969550  | -0.037106 | -0.451245 |
| 5  | 6  | 0 | 0.160206  | 1.145883  | -0.198276 |
| 6  | 6  | 0 | 0.882240  | 2.351982  | 0.006997  |
| 7  | 6  | 0 | 3.123799  | -1.235505 | -0.681286 |
| 8  | 6  | 0 | 0.274049  | -1.238382 | -0.763078 |
| 9  | 1  | 0 | 0.339470  | 3.295742  | 0.137339  |
| 10 | 6  | 0 | 0.985568  | -2.410285 | -1.043342 |
| 11 | 6  | 0 | 2.389832  | -2.403480 | -0.982302 |
| 12 | 1  | 0 | 0.463666  | -3.332665 | -1.324237 |
| 13 | 6  | 0 | 6.672606  | 2.432051  | 0.219452  |
| 14 | 6  | 0 | 7.390501  | 1.266408  | -0.014390 |
| 15 | 6  | 0 | 6.711718  | 0.046902  | -0.298677 |
| 16 | 6  | 0 | 5.268617  | 0.025658  | -0.346719 |
| 17 | 6  | 0 | 4.538029  | 1.246291  | -0.105956 |
| 18 | 6  | 0 | 5.265322  | 2.420114  | 0.175638  |
| 19 | 1  | 0 | 7.196641  | 3.368170  | 0.440119  |
| 20 | 6  | 0 | 7.440946  | -1.152604 | -0.535389 |
| 21 | 6  | 0 | 4.594765  | -1.212838 | -0.633524 |
| 22 | 6  | 0 | 5.367297  | -2.366964 | -0.854972 |
| 23 | 6  | 0 | 6.775323  | -2.339575 | -0.808534 |
| 24 | 1  | 0 | 7.339022  | -3.261012 | -0.989118 |
| 25 | 1  | 0 | 4.879026  | -3.321889 | -1.069625 |
| 26 | 1  | 0 | 2.915169  | -3.336158 | -1.205630 |
| 27 | 1  | 0 | 4.736102  | 3.357362  | 0.370274  |
| 28 | 1  | 0 | 2.764666  | 3.347679  | 0.197767  |
| 29 | 15 | 0 | -1.534349 | -0.946940 | -0.920855 |
| 30 | 6  | 0 | -3.530201 | -3.512481 | 1.492719  |
| 31 | 6  | 0 | -2.609119 | -3.078892 | 2.409043  |
| 32 | 1  | 0 | -4.334139 | -4.237527 | 1.589043  |
| 33 | 1  | 0 | -2.463066 | -3.362748 | 3.447978  |
| 34 | 6  | 0 | -4.222430 | 3.301768  | -0.923305 |
| 35 | 6  | 0 | -3.772208 | 3.757861  | 0.284152  |
| 36 | 1  | 0 | -5.026120 | 3.667142  | -1.556885 |
| 37 | 1  | 0 | -4.126039 | 4.577937  | 0.903471  |
| 38 | 6  | 0 | -2.209229 | -1.986544 | 0.475216  |
| 39 | 6  | 0 | -2.476363 | 1.981334  | -0.303918 |
| 40 | 7  | 0 | -1.808919 | -2.139707 | 1.779277  |
| 41 | 7  | 0 | -3.274759 | -2.839923 | 0.308729  |
| 42 | 7  | 0 | -2.705216 | 2.950127  | 0.655753  |
| 43 | 7  | 0 | -3.433029 | 2.214937  | -1.275827 |
| 44 | 6  | 0 | -0.663065 | -1.448350 | 2.445109  |
| 45 | 6  | 0 | 0.503443  | -2.427365 | 2.643130  |
| 46 | 6  | 0 | -1.124975 | -0.809720 | 3.763155  |

|    |   |   |           |           |           |
|----|---|---|-----------|-----------|-----------|
| 47 | 1 | 0 | -0.370724 | -0.652697 | 1.741848  |
| 48 | 1 | 0 | 0.832537  | -2.856388 | 1.683519  |
| 49 | 1 | 0 | 1.357690  | -1.887916 | 3.085597  |
| 50 | 1 | 0 | 0.227611  | -3.247111 | 3.330925  |
| 51 | 1 | 0 | -1.995760 | -0.150690 | 3.611765  |
| 52 | 1 | 0 | -1.383475 | -1.565752 | 4.525751  |
| 53 | 1 | 0 | -0.298955 | -0.204246 | 4.172493  |
| 54 | 6 | 0 | -4.046896 | -3.062822 | -0.950551 |
| 55 | 6 | 0 | -5.512936 | -2.650605 | -0.752947 |
| 56 | 6 | 0 | -3.882952 | -4.515106 | -1.422125 |
| 57 | 1 | 0 | -3.568035 | -2.389363 | -1.682211 |
| 58 | 1 | 0 | -5.594254 | -1.604920 | -0.410475 |
| 59 | 1 | 0 | -6.050741 | -2.744865 | -1.711394 |
| 60 | 1 | 0 | -6.026919 | -3.297389 | -0.019757 |
| 61 | 1 | 0 | -2.819306 | -4.774316 | -1.554976 |
| 62 | 1 | 0 | -4.334069 | -5.232695 | -0.714058 |
| 63 | 1 | 0 | -4.390865 | -4.641491 | -2.393072 |
| 64 | 6 | 0 | -3.452892 | 1.592991  | -2.630114 |
| 65 | 6 | 0 | -2.741773 | 2.510152  | -3.638632 |
| 66 | 6 | 0 | -4.886961 | 1.239265  | -3.047299 |
| 67 | 1 | 0 | -2.874012 | 0.661688  | -2.522271 |
| 68 | 1 | 0 | -1.708387 | 2.721070  | -3.316279 |
| 69 | 1 | 0 | -2.701381 | 2.017982  | -4.625339 |
| 70 | 1 | 0 | -3.277770 | 3.468740  | -3.756764 |
| 71 | 1 | 0 | -5.388588 | 0.616153  | -2.287168 |
| 72 | 1 | 0 | -5.504740 | 2.137444  | -3.225456 |
| 73 | 1 | 0 | -4.858017 | 0.674261  | -3.994143 |
| 74 | 6 | 0 | -2.043823 | 3.022572  | 1.985442  |
| 75 | 6 | 0 | -3.030658 | 2.587884  | 3.082766  |
| 76 | 6 | 0 | -1.473898 | 4.426066  | 2.239571  |
| 77 | 1 | 0 | -1.215967 | 2.296250  | 1.920998  |
| 78 | 1 | 0 | -3.447841 | 1.588735  | 2.869426  |
| 79 | 1 | 0 | -2.515494 | 2.552917  | 4.057807  |
| 80 | 1 | 0 | -3.871018 | 3.298750  | 3.173637  |
| 81 | 1 | 0 | -0.796161 | 4.743082  | 1.430084  |
| 82 | 1 | 0 | -2.274070 | 5.181256  | 2.338480  |
| 83 | 1 | 0 | -0.903984 | 4.424460  | 3.184005  |
| 84 | 5 | 0 | -1.345860 | 0.906718  | -0.306917 |
| 85 | 1 | 0 | 8.485902  | 1.266836  | 0.017310  |
| 86 | 1 | 0 | 8.535831  | -1.121150 | -0.497254 |

-----

**1PB-d**

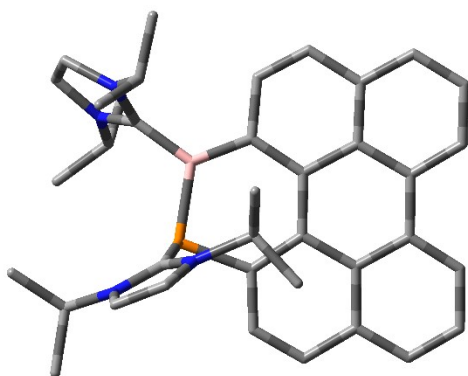

UB3LYP/6-31G\*

| Center<br>Number | Atomic<br>Number | Atomic<br>Type | Coordinates (Angstroms) |           |           |
|------------------|------------------|----------------|-------------------------|-----------|-----------|
|                  |                  |                | X                       | Y         | Z         |
| 1                | 6                | 0              | -0.861729               | 1.355174  | -1.050363 |
| 2                | 6                | 0              | -1.946665               | 0.509182  | -0.696472 |
| 3                | 6                | 0              | -3.280085               | 1.063554  | -0.830402 |
| 4                | 6                | 0              | -3.470006               | 2.397823  | -1.332258 |
| 5                | 6                | 0              | -2.344656               | 3.175615  | -1.705273 |
| 6                | 6                | 0              | -1.086616               | 2.657262  | -1.570195 |
| 7                | 6                | 0              | -4.442870               | 0.315347  | -0.463699 |
| 8                | 6                | 0              | -4.767762               | 2.939872  | -1.466189 |
| 9                | 1                | 0              | -2.498891               | 4.174141  | -2.105114 |
| 10               | 1                | 0              | -0.227250               | 3.250732  | -1.874186 |
| 11               | 6                | 0              | -5.872454               | 2.194712  | -1.115140 |
| 12               | 6                | 0              | -5.705281               | 0.897694  | -0.620158 |
| 13               | 1                | 0              | -4.875085               | 3.949060  | -1.854403 |
| 14               | 1                | 0              | -6.872677               | 2.604216  | -1.222434 |
| 15               | 6                | 0              | -0.485897               | -2.923583 | 0.227613  |
| 16               | 6                | 0              | -1.598669               | -3.620358 | 0.570994  |
| 17               | 6                | 0              | -2.876161               | -2.987341 | 0.556964  |
| 18               | 6                | 0              | -2.977530               | -1.620731 | 0.122585  |
| 19               | 6                | 0              | -1.791182               | -0.874467 | -0.224776 |
| 20               | 6                | 0              | -0.505003               | -1.526799 | -0.130732 |
| 21               | 1                | 0              | -3.900544               | -4.739973 | 1.269356  |
| 22               | 1                | 0              | 0.470205                | -3.440076 | 0.226495  |
| 23               | 1                | 0              | -1.539146               | -4.668866 | 0.853127  |
| 24               | 6                | 0              | -4.017305               | -3.708889 | 0.945976  |
| 25               | 6                | 0              | -4.285569               | -1.044400 | 0.053806  |
| 26               | 6                | 0              | -5.389830               | -1.798510 | 0.470636  |
| 27               | 6                | 0              | -5.265925               | -3.114094 | 0.917326  |
| 28               | 1                | 0              | -6.148867               | -3.664518 | 1.228439  |
| 29               | 15               | 0              | 0.907413                | 0.929962  | -0.959958 |
| 30               | 6                | 0              | 1.669047                | 3.011727  | 2.513490  |

|    |   |   |           |           |           |
|----|---|---|-----------|-----------|-----------|
| 31 | 6 | 0 | 2.714895  | 3.392202  | 1.734469  |
| 32 | 1 | 0 | 1.406899  | 3.301241  | 3.518354  |
| 33 | 1 | 0 | 3.530143  | 4.067189  | 1.939618  |
| 34 | 6 | 0 | 4.054155  | -2.826527 | 0.149617  |
| 35 | 6 | 0 | 4.033695  | -2.740303 | -1.205211 |
| 36 | 1 | 0 | 4.772665  | -3.284761 | 0.810092  |
| 37 | 1 | 0 | 4.728027  | -3.116554 | -1.939307 |
| 38 | 6 | 0 | 1.464453  | 1.954500  | 0.547550  |
| 39 | 6 | 0 | 2.188998  | -1.705527 | -0.433914 |
| 40 | 7 | 0 | 2.577524  | 2.739982  | 0.524499  |
| 41 | 7 | 0 | 0.911241  | 2.121541  | 1.778601  |
| 42 | 7 | 0 | 2.915657  | -2.189503 | 0.612612  |
| 43 | 7 | 0 | 2.885035  | -2.052229 | -1.552041 |
| 44 | 6 | 0 | 2.567989  | -2.025933 | 2.045003  |
| 45 | 6 | 0 | 3.572486  | -1.093307 | 2.730965  |
| 46 | 6 | 0 | 2.456773  | -3.386872 | 2.738542  |
| 47 | 1 | 0 | 1.582181  | -1.553524 | 2.030150  |
| 48 | 1 | 0 | 3.622654  | -0.123468 | 2.225014  |
| 49 | 1 | 0 | 3.270826  | -0.924516 | 3.769738  |
| 50 | 1 | 0 | 4.578542  | -1.526911 | 2.745646  |
| 51 | 1 | 0 | 1.728386  | -4.028778 | 2.235819  |
| 52 | 1 | 0 | 3.420109  | -3.907830 | 2.771273  |
| 53 | 1 | 0 | 2.125607  | -3.241780 | 3.771528  |
| 54 | 6 | 0 | 2.425757  | -1.841322 | -2.950720 |
| 55 | 6 | 0 | 2.089857  | -3.185891 | -3.603868 |
| 56 | 6 | 0 | 3.454553  | -1.027379 | -3.738328 |
| 57 | 1 | 0 | 1.507382  | -1.258220 | -2.851503 |
| 58 | 1 | 0 | 1.342972  | -3.730365 | -3.018315 |
| 59 | 1 | 0 | 1.679415  | -3.012160 | -4.603373 |
| 60 | 1 | 0 | 2.978471  | -3.817845 | -3.712732 |
| 61 | 1 | 0 | 3.660655  | -0.071918 | -3.246244 |
| 62 | 1 | 0 | 4.398889  | -1.570149 | -3.860536 |
| 63 | 1 | 0 | 3.062597  | -0.818248 | -4.738314 |
| 64 | 6 | 0 | -0.348907 | 1.503753  | 2.283615  |
| 65 | 6 | 0 | -1.464019 | 2.552564  | 2.331692  |
| 66 | 6 | 0 | -0.109934 | 0.835669  | 3.640787  |
| 67 | 1 | 0 | -0.600951 | 0.735404  | 1.554993  |
| 68 | 1 | 0 | -1.614993 | 3.014876  | 1.353033  |
| 69 | 1 | 0 | -2.400448 | 2.070865  | 2.628615  |
| 70 | 1 | 0 | -1.241395 | 3.337362  | 3.064030  |
| 71 | 1 | 0 | 0.722578  | 0.126499  | 3.599236  |
| 72 | 1 | 0 | 0.093589  | 1.564582  | 4.433014  |
| 73 | 1 | 0 | -1.011364 | 0.285437  | 3.926168  |
| 74 | 6 | 0 | 3.520976  | 2.916568  | -0.615017 |

|    |   |   |           |           |           |
|----|---|---|-----------|-----------|-----------|
| 75 | 6 | 0 | 4.889740  | 2.325232  | -0.265457 |
| 76 | 6 | 0 | 3.588683  | 4.390088  | -1.026225 |
| 77 | 1 | 0 | 3.075321  | 2.341030  | -1.428926 |
| 78 | 1 | 0 | 4.807735  | 1.266808  | 0.003168  |
| 79 | 1 | 0 | 5.554276  | 2.407494  | -1.131264 |
| 80 | 1 | 0 | 5.362649  | 2.857948  | 0.567207  |
| 81 | 1 | 0 | 2.593636  | 4.782185  | -1.257713 |
| 82 | 1 | 0 | 4.036715  | 5.016198  | -0.246813 |
| 83 | 1 | 0 | 4.209384  | 4.485259  | -1.922452 |
| 84 | 5 | 0 | 0.832292  | -0.883516 | -0.393202 |
| 85 | 1 | 0 | -6.381579 | -1.364137 | 0.450927  |
| 86 | 1 | 0 | -6.596195 | 0.337856  | -0.365114 |

-----

**UWB97XD/6-31G\***

| Center<br>Number | Atomic<br>Number | Atomic<br>Type | Coordinates (Angstroms) |           |           |
|------------------|------------------|----------------|-------------------------|-----------|-----------|
|                  |                  |                | X                       | Y         | Z         |
| 1                | 6                | 0              | -0.911943               | 1.392785  | -1.146996 |
| 2                | 6                | 0              | -1.962090               | 0.511877  | -0.816755 |
| 3                | 6                | 0              | -3.306318               | 1.037321  | -0.899781 |
| 4                | 6                | 0              | -3.534911               | 2.373681  | -1.349307 |
| 5                | 6                | 0              | -2.438443               | 3.194725  | -1.710645 |
| 6                | 6                | 0              | -1.171304               | 2.707789  | -1.610680 |
| 7                | 6                | 0              | -4.438712               | 0.254592  | -0.525503 |
| 8                | 6                | 0              | -4.845513               | 2.887180  | -1.442532 |
| 9                | 1                | 0              | -2.624681               | 4.202865  | -2.068869 |
| 10               | 1                | 0              | -0.329032               | 3.334135  | -1.894024 |
| 11               | 6                | 0              | -5.919788               | 2.106291  | -1.100680 |
| 12               | 6                | 0              | -5.710735               | 0.801171  | -0.645417 |
| 13               | 1                | 0              | -4.985158               | 3.904990  | -1.794990 |
| 14               | 1                | 0              | -6.931310               | 2.491384  | -1.180440 |
| 15               | 6                | 0              | -0.399319               | -2.892399 | 0.013737  |
| 16               | 6                | 0              | -1.478073               | -3.615630 | 0.385615  |
| 17               | 6                | 0              | -2.770562               | -3.012436 | 0.411464  |
| 18               | 6                | 0              | -2.920585               | -1.656556 | -0.010774 |
| 19               | 6                | 0              | -1.765806               | -0.881055 | -0.388897 |
| 20               | 6                | 0              | -0.473848               | -1.496831 | -0.334950 |
| 21               | 1                | 0              | -3.727510               | -4.790327 | 1.149966  |
| 22               | 1                | 0              | 0.572295                | -3.379502 | -0.021719 |
| 23               | 1                | 0              | -1.384578               | -4.663050 | 0.660341  |
| 24               | 6                | 0              | -3.878044               | -3.761093 | 0.836160  |
| 25               | 6                | 0              | -4.235783               | -1.109575 | -0.027239 |

|    |    |   |           |           |           |
|----|----|---|-----------|-----------|-----------|
| 26 | 6  | 0 | -5.302442 | -1.881925 | 0.425594  |
| 27 | 6  | 0 | -5.134111 | -3.196231 | 0.857610  |
| 28 | 1  | 0 | -5.992219 | -3.766508 | 1.198195  |
| 29 | 15 | 0 | 0.861165  | 1.029565  | -1.051660 |
| 30 | 6  | 0 | 1.471697  | 2.620244  | 2.662336  |
| 31 | 6  | 0 | 2.588373  | 3.020000  | 2.007862  |
| 32 | 1  | 0 | 1.155065  | 2.801780  | 3.676357  |
| 33 | 1  | 0 | 3.426053  | 3.605308  | 2.348951  |
| 34 | 6  | 0 | 4.102077  | -2.436218 | 0.326932  |
| 35 | 6  | 0 | 4.248802  | -2.335017 | -1.015664 |
| 36 | 1  | 0 | 4.770682  | -2.825847 | 1.077608  |
| 37 | 1  | 0 | 5.067498  | -2.624976 | -1.654297 |
| 38 | 6  | 0 | 1.342091  | 1.840257  | 0.578980  |
| 39 | 6  | 0 | 2.231747  | -1.518463 | -0.494197 |
| 40 | 7  | 0 | 2.492687  | 2.538880  | 0.721616  |
| 41 | 7  | 0 | 0.720780  | 1.882040  | 1.778119  |
| 42 | 7  | 0 | 2.855941  | -1.931235 | 0.632562  |
| 43 | 7  | 0 | 3.089582  | -1.772684 | -1.506143 |
| 44 | 6  | 0 | 2.310979  | -1.780036 | 1.992619  |
| 45 | 6  | 0 | 3.127274  | -0.744149 | 2.761107  |
| 46 | 6  | 0 | 2.233276  | -3.128447 | 2.699443  |
| 47 | 1  | 0 | 1.296280  | -1.403624 | 1.837174  |
| 48 | 1  | 0 | 3.148060  | 0.210700  | 2.227089  |
| 49 | 1  | 0 | 2.686000  | -0.578071 | 3.748144  |
| 50 | 1  | 0 | 4.159074  | -1.079946 | 2.910785  |
| 51 | 1  | 0 | 1.637253  | -3.838113 | 2.120278  |
| 52 | 1  | 0 | 3.227135  | -3.556021 | 2.869933  |
| 53 | 1  | 0 | 1.755648  | -2.999503 | 3.674748  |
| 54 | 6  | 0 | 2.807314  | -1.523183 | -2.933540 |
| 55 | 6  | 0 | 2.938689  | -2.817062 | -3.731094 |
| 56 | 6  | 0 | 3.696027  | -0.398347 | -3.454166 |
| 57 | 1  | 0 | 1.763191  | -1.198802 | -2.955074 |
| 58 | 1  | 0 | 2.307211  | -3.603004 | -3.307801 |
| 59 | 1  | 0 | 2.620892  | -2.639437 | -4.761920 |
| 60 | 1  | 0 | 3.973845  | -3.173866 | -3.760416 |
| 61 | 1  | 0 | 3.531023  | 0.519376  | -2.882065 |
| 62 | 1  | 0 | 4.756463  | -0.668546 | -3.397237 |
| 63 | 1  | 0 | 3.455918  | -0.195513 | -4.501385 |
| 64 | 6  | 0 | -0.584622 | 1.267060  | 2.115519  |
| 65 | 6  | 0 | -1.690314 | 2.316468  | 2.070847  |
| 66 | 6  | 0 | -0.511529 | 0.550472  | 3.459977  |
| 67 | 1  | 0 | -0.753454 | 0.518898  | 1.345269  |
| 68 | 1  | 0 | -1.706476 | 2.833794  | 1.108611  |
| 69 | 1  | 0 | -2.658144 | 1.825938  | 2.206608  |



|    |   |   |           |           |           |
|----|---|---|-----------|-----------|-----------|
| 70 | 1 | 0 | -1.563045 | 3.055138  | 2.870319  |
| 71 | 1 | 0 | 0.330809  | -0.145860 | 3.501087  |
| 72 | 1 | 0 | -0.433927 | 1.246358  | 4.301946  |
| 73 | 1 | 0 | -1.431868 | -0.023975 | 3.593630  |
| 74 | 6 | 0 | 3.544961  | 2.679734  | -0.309824 |
| 75 | 6 | 0 | 4.551934  | 1.540233  | -0.170171 |
| 76 | 6 | 0 | 4.194284  | 4.057163  | -0.242176 |
| 77 | 1 | 0 | 3.018796  | 2.579686  | -1.261957 |
| 78 | 1 | 0 | 4.059790  | 0.567211  | -0.266078 |
| 79 | 1 | 0 | 5.310930  | 1.617653  | -0.954015 |
| 80 | 1 | 0 | 5.057648  | 1.580313  | 0.800885  |
| 81 | 1 | 0 | 3.444529  | 4.853024  | -0.256334 |
| 82 | 1 | 0 | 4.823431  | 4.175817  | 0.646181  |
| 83 | 1 | 0 | 4.840687  | 4.183873  | -1.114513 |
| 84 | 5 | 0 | 0.830648  | -0.801240 | -0.595298 |
| 85 | 1 | 0 | -6.303049 | -1.468966 | 0.452145  |
| 86 | 1 | 0 | -6.583787 | 0.212605  | -0.393675 |

-----

**UM06-2X/6-31G\***

-----

| Center<br>Number | Atomic<br>Number | Atomic<br>Type | Coordinates (Angstroms) |           |           |
|------------------|------------------|----------------|-------------------------|-----------|-----------|
|                  |                  |                | X                       | Y         | Z         |
| 1                | 6                | 0              | -0.910199               | 1.388167  | -1.115477 |
| 2                | 6                | 0              | -1.966288               | 0.513720  | -0.786295 |
| 3                | 6                | 0              | -3.308660               | 1.046410  | -0.877422 |
| 4                | 6                | 0              | -3.527404               | 2.389029  | -1.316268 |
| 5                | 6                | 0              | -2.424482               | 3.206701  | -1.670102 |
| 6                | 6                | 0              | -1.160740               | 2.708777  | -1.575205 |
| 7                | 6                | 0              | -4.450611               | 0.265945  | -0.521575 |
| 8                | 6                | 0              | -4.834021               | 2.914083  | -1.409978 |
| 9                | 1                | 0              | -2.606450               | 4.218512  | -2.020162 |
| 10               | 1                | 0              | -0.312452               | 3.328363  | -1.856521 |
| 11               | 6                | 0              | -5.915735               | 2.138572  | -1.077176 |
| 12               | 6                | 0              | -5.717665               | 0.825572  | -0.635484 |
| 13               | 1                | 0              | -4.961264               | 3.936322  | -1.753863 |
| 14               | 1                | 0              | -6.923889               | 2.532498  | -1.153117 |
| 15               | 6                | 0              | -0.421851               | -2.884055 | 0.111178  |
| 16               | 6                | 0              | -1.510501               | -3.607762 | 0.460713  |
| 17               | 6                | 0              | -2.804731               | -3.009797 | 0.434285  |
| 18               | 6                | 0              | -2.944892               | -1.653422 | 0.007242  |
| 19               | 6                | 0              | -1.781247               | -0.880299 | -0.347274 |
| 20               | 6                | 0              | -0.494910               | -1.497451 | -0.269486 |

|    |    |   |           |           |           |
|----|----|---|-----------|-----------|-----------|
| 21 | 1  | 0 | -3.776896 | -4.795050 | 1.132578  |
| 22 | 1  | 0 | 0.554378  | -3.365301 | 0.112833  |
| 23 | 1  | 0 | -1.424560 | -4.650559 | 0.754661  |
| 24 | 6  | 0 | -3.924482 | -3.766661 | 0.815088  |
| 25 | 6  | 0 | -4.261688 | -1.108700 | -0.044673 |
| 26 | 6  | 0 | -5.341294 | -1.891551 | 0.354765  |
| 27 | 6  | 0 | -5.183847 | -3.210212 | 0.784480  |
| 28 | 1  | 0 | -6.052514 | -3.787016 | 1.083840  |
| 29 | 15 | 0 | 0.865657  | 1.012550  | -1.045125 |
| 30 | 6  | 0 | 1.472116  | 2.646579  | 2.662441  |
| 31 | 6  | 0 | 2.587658  | 3.052461  | 2.003572  |
| 32 | 1  | 0 | 1.150738  | 2.832384  | 3.674982  |
| 33 | 1  | 0 | 3.419214  | 3.651117  | 2.337798  |
| 34 | 6  | 0 | 4.116259  | -2.460035 | 0.249811  |
| 35 | 6  | 0 | 4.236465  | -2.311023 | -1.093056 |
| 36 | 1  | 0 | 4.803531  | -2.866028 | 0.975265  |
| 37 | 1  | 0 | 5.045515  | -2.569551 | -1.758012 |
| 38 | 6  | 0 | 1.351623  | 1.847702  | 0.583754  |
| 39 | 6  | 0 | 2.216415  | -1.540926 | -0.505991 |
| 40 | 7  | 0 | 2.495492  | 2.558702  | 0.721857  |
| 41 | 7  | 0 | 0.730139  | 1.895742  | 1.781630  |
| 42 | 7  | 0 | 2.867559  | -1.986758 | 0.593617  |
| 43 | 7  | 0 | 3.059913  | -1.750271 | -1.542259 |
| 44 | 6  | 0 | 2.360410  | -1.869117 | 1.974430  |
| 45 | 6  | 0 | 3.106866  | -0.745820 | 2.689030  |
| 46 | 6  | 0 | 2.460257  | -3.205771 | 2.698535  |
| 47 | 1  | 0 | 1.305876  | -1.599922 | 1.860741  |
| 48 | 1  | 0 | 2.979811  | 0.203836  | 2.157567  |
| 49 | 1  | 0 | 2.727554  | -0.628610 | 3.708129  |
| 50 | 1  | 0 | 4.177731  | -0.967429 | 2.752566  |
| 51 | 1  | 0 | 1.941844  | -3.991661 | 2.143584  |
| 52 | 1  | 0 | 3.501900  | -3.507115 | 2.849201  |
| 53 | 1  | 0 | 1.995687  | -3.117832 | 3.683888  |
| 54 | 6  | 0 | 2.755907  | -1.467732 | -2.961697 |
| 55 | 6  | 0 | 2.918889  | -2.736892 | -3.791450 |
| 56 | 6  | 0 | 3.621129  | -0.315968 | -3.460149 |
| 57 | 1  | 0 | 1.704405  | -1.166816 | -2.966501 |
| 58 | 1  | 0 | 2.317086  | -3.552435 | -3.382930 |
| 59 | 1  | 0 | 2.588960  | -2.542923 | -4.814858 |
| 60 | 1  | 0 | 3.965057  | -3.056585 | -3.835019 |
| 61 | 1  | 0 | 3.430155  | 0.590535  | -2.878467 |
| 62 | 1  | 0 | 4.685649  | -0.566967 | -3.394991 |
| 63 | 1  | 0 | 3.386318  | -0.107631 | -4.507061 |
| 64 | 6  | 0 | -0.564793 | 1.257147  | 2.121369  |

|    |   |   |           |           |           |
|----|---|---|-----------|-----------|-----------|
| 65 | 6 | 0 | -1.689466 | 2.285014  | 2.075700  |
| 66 | 6 | 0 | -0.469308 | 0.555666  | 3.471384  |
| 67 | 1 | 0 | -0.714417 | 0.501520  | 1.353006  |
| 68 | 1 | 0 | -1.719764 | 2.797789  | 1.110783  |
| 69 | 1 | 0 | -2.646724 | 1.776450  | 2.222007  |
| 70 | 1 | 0 | -1.568092 | 3.027729  | 2.872047  |
| 71 | 1 | 0 | 0.387162  | -0.124054 | 3.508869  |
| 72 | 1 | 0 | -0.394927 | 1.264097  | 4.302518  |
| 73 | 1 | 0 | -1.378558 | -0.032013 | 3.620045  |
| 74 | 6 | 0 | 3.552206  | 2.682567  | -0.309863 |
| 75 | 6 | 0 | 4.482453  | 1.475452  | -0.219736 |
| 76 | 6 | 0 | 4.295636  | 4.004263  | -0.168325 |
| 77 | 1 | 0 | 3.020178  | 2.664660  | -1.264416 |
| 78 | 1 | 0 | 3.926292  | 0.541010  | -0.357333 |
| 79 | 1 | 0 | 5.250546  | 1.536764  | -0.996027 |
| 80 | 1 | 0 | 4.979103  | 1.445807  | 0.756349  |
| 81 | 1 | 0 | 3.605180  | 4.850848  | -0.133010 |
| 82 | 1 | 0 | 4.930936  | 4.021745  | 0.722704  |
| 83 | 1 | 0 | 4.948936  | 4.132941  | -1.034386 |
| 84 | 5 | 0 | 0.816171  | -0.814214 | -0.559055 |
| 85 | 1 | 0 | -6.344485 | -1.485134 | 0.338904  |
| 86 | 1 | 0 | -6.595024 | 0.242835  | -0.386533 |

-----

**UBP86/6-31G\***

| Center<br>Number | Atomic<br>Number | Atomic<br>Type | Coordinates (Angstroms) |           |           |
|------------------|------------------|----------------|-------------------------|-----------|-----------|
|                  |                  |                | X                       | Y         | Z         |
| 1                | 6                | 0              | -0.846120               | 1.384315  | -1.018780 |
| 2                | 6                | 0              | -1.941703               | 0.524748  | -0.690770 |
| 3                | 6                | 0              | -3.277885               | 1.086674  | -0.820767 |
| 4                | 6                | 0              | -3.464596               | 2.442158  | -1.293552 |
| 5                | 6                | 0              | -2.331543               | 3.230952  | -1.640483 |
| 6                | 6                | 0              | -1.064927               | 2.704034  | -1.509043 |
| 7                | 6                | 0              | -4.449149               | 0.326120  | -0.479435 |
| 8                | 6                | 0              | -4.767798               | 2.990080  | -1.424488 |
| 9                | 1                | 0              | -2.483504               | 4.247671  | -2.020125 |
| 10               | 1                | 0              | -0.194050               | 3.307104  | -1.794844 |
| 11               | 6                | 0              | -5.883391               | 2.230932  | -1.100143 |
| 12               | 6                | 0              | -5.719492               | 0.916292  | -0.634260 |
| 13               | 1                | 0              | -4.872287               | 4.017369  | -1.791437 |
| 14               | 1                | 0              | -6.890815               | 2.646643  | -1.208056 |
| 15               | 6                | 0              | -0.479952               | -2.945798 | 0.136906  |

|    |    |   |           |           |           |
|----|----|---|-----------|-----------|-----------|
| 16 | 6  | 0 | -1.603489 | -3.656913 | 0.459932  |
| 17 | 6  | 0 | -2.883277 | -3.018501 | 0.465379  |
| 18 | 6  | 0 | -2.981725 | -1.630956 | 0.067136  |
| 19 | 6  | 0 | -1.789582 | -0.873930 | -0.254531 |
| 20 | 6  | 0 | -0.496803 | -1.534049 | -0.173114 |
| 21 | 1  | 0 | -3.918135 | -4.800301 | 1.130598  |
| 22 | 1  | 0 | 0.484700  | -3.466484 | 0.114888  |
| 23 | 1  | 0 | -1.546332 | -4.723326 | 0.709674  |
| 24 | 6  | 0 | -4.033294 | -3.751203 | 0.834463  |
| 25 | 6  | 0 | -4.295676 | -1.047469 | 0.007877  |
| 26 | 6  | 0 | -5.409400 | -1.814392 | 0.407781  |
| 27 | 6  | 0 | -5.288443 | -3.147996 | 0.821991  |
| 28 | 1  | 0 | -6.180031 | -3.708868 | 1.121258  |
| 29 | 15 | 0 | 0.929197  | 0.954842  | -0.922568 |
| 30 | 6  | 0 | 1.621881  | 2.949512  | 2.622621  |
| 31 | 6  | 0 | 2.669329  | 3.385910  | 1.855027  |
| 32 | 1  | 0 | 1.342709  | 3.203493  | 3.642012  |
| 33 | 1  | 0 | 3.471200  | 4.082633  | 2.085590  |
| 34 | 6  | 0 | 4.066108  | -2.880488 | 0.088368  |
| 35 | 6  | 0 | 4.087253  | -2.688256 | -1.266989 |
| 36 | 1  | 0 | 4.768631  | -3.394828 | 0.739105  |
| 37 | 1  | 0 | 4.806935  | -3.013849 | -2.013833 |
| 38 | 6  | 0 | 1.458838  | 1.937247  | 0.612060  |
| 39 | 6  | 0 | 2.208706  | -1.700286 | -0.467220 |
| 40 | 7  | 0 | 2.556620  | 2.762920  | 0.621524  |
| 41 | 7  | 0 | 0.891812  | 2.056051  | 1.854606  |
| 42 | 7  | 0 | 2.910708  | -2.274513 | 0.565852  |
| 43 | 7  | 0 | 2.946565  | -1.968268 | -1.594945 |
| 44 | 6  | 0 | 2.526091  | -2.201664 | 2.001230  |
| 45 | 6  | 0 | 3.506148  | -1.296157 | 2.764659  |
| 46 | 6  | 0 | 2.419710  | -3.607049 | 2.610771  |
| 47 | 1  | 0 | 1.524702  | -1.736171 | 1.985167  |
| 48 | 1  | 0 | 3.551138  | -0.288874 | 2.316440  |
| 49 | 1  | 0 | 3.180759  | -1.195756 | 3.814322  |
| 50 | 1  | 0 | 4.525967  | -1.720148 | 2.772317  |
| 51 | 1  | 0 | 1.712999  | -4.236523 | 2.046126  |
| 52 | 1  | 0 | 3.399236  | -4.116527 | 2.643430  |
| 53 | 1  | 0 | 2.053414  | -3.528325 | 3.648257  |
| 54 | 6  | 0 | 2.517306  | -1.661817 | -2.990197 |
| 55 | 6  | 0 | 2.206612  | -2.963884 | -3.744603 |
| 56 | 6  | 0 | 3.560603  | -0.785374 | -3.695301 |
| 57 | 1  | 0 | 1.583368  | -1.087298 | -2.864849 |
| 58 | 1  | 0 | 1.447421  | -3.559681 | -3.211155 |
| 59 | 1  | 0 | 1.811848  | -2.721161 | -4.745595 |

|    |   |   |           |           |           |
|----|---|---|-----------|-----------|-----------|
| 60 | 1 | 0 | 3.110854  | -3.583467 | -3.881176 |
| 61 | 1 | 0 | 3.744581  | 0.144085  | -3.130821 |
| 62 | 1 | 0 | 4.521041  | -1.314911 | -3.829552 |
| 63 | 1 | 0 | 3.190079  | -0.511121 | -4.697267 |
| 64 | 6 | 0 | -0.360556 | 1.388012  | 2.324721  |
| 65 | 6 | 0 | -1.507538 | 2.407932  | 2.378025  |
| 66 | 6 | 0 | -0.121178 | 0.692536  | 3.672654  |
| 67 | 1 | 0 | -0.576366 | 0.624478  | 1.562049  |
| 68 | 1 | 0 | -1.655940 | 2.892832  | 1.399784  |
| 69 | 1 | 0 | -2.442481 | 1.889917  | 2.648944  |
| 70 | 1 | 0 | -1.316872 | 3.186344  | 3.138986  |
| 71 | 1 | 0 | 0.740818  | 0.005602  | 3.627645  |
| 72 | 1 | 0 | 0.046461  | 1.413534  | 4.492521  |
| 73 | 1 | 0 | -1.016523 | 0.103310  | 3.931427  |
| 74 | 6 | 0 | 3.494949  | 3.000846  | -0.516150 |
| 75 | 6 | 0 | 4.891029  | 2.460093  | -0.174385 |
| 76 | 6 | 0 | 3.498746  | 4.487831  | -0.899567 |
| 77 | 1 | 0 | 3.062626  | 2.412951  | -1.344633 |
| 78 | 1 | 0 | 4.854243  | 1.387463  | 0.081297  |
| 79 | 1 | 0 | 5.555923  | 2.584399  | -1.045883 |
| 80 | 1 | 0 | 5.346021  | 3.005726  | 0.671508  |
| 81 | 1 | 0 | 2.480396  | 4.845261  | -1.126432 |
| 82 | 1 | 0 | 3.923279  | 5.121443  | -0.100730 |
| 83 | 1 | 0 | 4.120611  | 4.628663  | -1.799643 |
| 84 | 5 | 0 | 0.853167  | -0.882207 | -0.406795 |
| 85 | 1 | 0 | -6.407940 | -1.370631 | 0.399592  |
| 86 | 1 | 0 | -6.619157 | 0.342143  | -0.400607 |

2PB-a

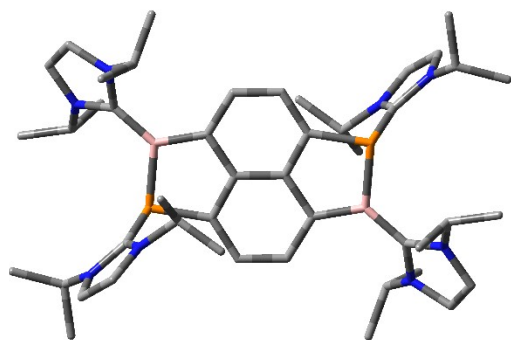

UB3LYP/6-31G\*

| Center<br>Number | Atomic<br>Number | Atomic<br>Type | Coordinates (Angstroms) |   |   |
|------------------|------------------|----------------|-------------------------|---|---|
|                  |                  |                | X                       | Y | Z |

|    |    |   |           |           |           |
|----|----|---|-----------|-----------|-----------|
| 1  | 6  | 0 | 0.819339  | 2.323450  | -0.620208 |
| 2  | 6  | 0 | 1.528422  | 1.156063  | -0.208488 |
| 3  | 6  | 0 | 0.704400  | -0.007799 | 0.079869  |
| 4  | 6  | 0 | -0.704432 | 0.007832  | -0.079854 |
| 5  | 6  | 0 | -1.335483 | 1.183512  | -0.551205 |
| 6  | 6  | 0 | -0.560501 | 2.329426  | -0.812757 |
| 7  | 1  | 0 | 1.364028  | 3.246354  | -0.799415 |
| 8  | 6  | 0 | 1.335451  | -1.183479 | 0.551223  |
| 9  | 6  | 0 | -1.528453 | -1.156031 | 0.208503  |
| 10 | 1  | 0 | -1.040383 | 3.237833  | -1.174673 |
| 11 | 6  | 0 | -0.819370 | -2.323419 | 0.620217  |
| 12 | 6  | 0 | 0.560470  | -2.329393 | 0.812773  |
| 13 | 1  | 0 | -1.364058 | -3.246326 | 0.799415  |
| 14 | 1  | 0 | 1.040352  | -3.237801 | 1.174690  |
| 15 | 15 | 0 | -3.106917 | 0.886357  | -0.840714 |
| 16 | 15 | 0 | 3.106881  | -0.886317 | 0.840747  |
| 17 | 6  | 0 | 5.978367  | 3.188617  | 0.662225  |
| 18 | 6  | 0 | 5.520793  | 3.674886  | -0.512619 |
| 19 | 6  | 0 | 4.410707  | -3.186782 | -2.292661 |
| 20 | 6  | 0 | 5.253130  | -3.575927 | -1.302477 |
| 21 | 6  | 0 | -5.520785 | -3.674928 | 0.512468  |
| 22 | 6  | 0 | -5.978322 | -3.188653 | -0.662389 |
| 23 | 6  | 0 | -5.253093 | 3.575947  | 1.302613  |
| 24 | 6  | 0 | -4.410674 | 3.186745  | 2.292779  |
| 25 | 6  | 0 | -4.164889 | -1.942042 | -0.076704 |
| 26 | 6  | 0 | -3.888739 | 1.995199  | 0.461389  |
| 27 | 6  | 0 | 3.888727  | -1.995191 | -0.461314 |
| 28 | 6  | 0 | 4.164878  | 1.942043  | 0.076637  |
| 29 | 1  | 0 | 5.893045  | 4.481180  | -1.123931 |
| 30 | 1  | 0 | 6.806039  | 3.512804  | 1.271838  |
| 31 | 1  | 0 | -6.805958 | -3.512853 | -1.272044 |
| 32 | 1  | 0 | -5.893042 | -4.481243 | 1.123751  |
| 33 | 7  | 0 | -5.161765 | -2.125553 | -1.024378 |
| 34 | 7  | 0 | -4.414526 | -2.918426 | 0.874697  |
| 35 | 7  | 0 | 4.414500  | 2.918405  | -0.874790 |
| 36 | 7  | 0 | 5.161799  | 2.125543  | 1.024266  |
| 37 | 6  | 0 | 3.827546  | 2.964447  | -2.228110 |
| 38 | 6  | 0 | 4.841693  | 2.450651  | -3.260239 |
| 39 | 6  | 0 | 3.331289  | 4.373708  | -2.568629 |
| 40 | 1  | 0 | 2.976489  | 2.282879  | -2.192488 |
| 41 | 1  | 0 | 5.209366  | 1.458209  | -2.980716 |
| 42 | 1  | 0 | 4.373549  | 2.383042  | -4.248033 |
| 43 | 1  | 0 | 5.703893  | 3.121941  | -3.343148 |
| 44 | 1  | 0 | 2.634653  | 4.746535  | -1.812498 |

|    |   |   |           |           |           |
|----|---|---|-----------|-----------|-----------|
| 45 | 1 | 0 | 4.160051  | 5.086634  | -2.651158 |
| 46 | 1 | 0 | 2.814908  | 4.358824  | -3.533970 |
| 47 | 6 | 0 | 5.150343  | 1.562242  | 2.390918  |
| 48 | 6 | 0 | 4.457604  | 2.529597  | 3.359565  |
| 49 | 6 | 0 | 6.563800  | 1.184429  | 2.843388  |
| 50 | 1 | 0 | 4.555532  | 0.651450  | 2.326172  |
| 51 | 1 | 0 | 3.443739  | 2.753134  | 3.013446  |
| 52 | 1 | 0 | 4.390960  | 2.080567  | 4.356477  |
| 53 | 1 | 0 | 5.012235  | 3.471099  | 3.446613  |
| 54 | 1 | 0 | 7.050247  | 0.523110  | 2.118656  |
| 55 | 1 | 0 | 7.203381  | 2.062292  | 2.989748  |
| 56 | 1 | 0 | 6.509377  | 0.661736  | 3.803856  |
| 57 | 6 | 0 | -5.150259 | -1.562235 | -2.391024 |
| 58 | 6 | 0 | -6.563706 | -1.184467 | -2.843563 |
| 59 | 6 | 0 | -4.457437 | -2.529555 | -3.359646 |
| 60 | 1 | 0 | -4.555482 | -0.651423 | -2.326236 |
| 61 | 1 | 0 | -7.050216 | -0.523176 | -2.118847 |
| 62 | 1 | 0 | -6.509253 | -0.661760 | -3.804021 |
| 63 | 1 | 0 | -7.203248 | -2.062351 | -2.989967 |
| 64 | 1 | 0 | -3.443582 | -2.753061 | -3.013477 |
| 65 | 1 | 0 | -5.012031 | -3.471075 | -3.446733 |
| 66 | 1 | 0 | -4.390757 | -2.080511 | -4.356549 |
| 67 | 6 | 0 | -3.827627 | -2.964476 | 2.228040  |
| 68 | 6 | 0 | -3.331344 | -4.373729 | 2.568553  |
| 69 | 6 | 0 | -4.841832 | -2.450728 | 3.260136  |
| 70 | 1 | 0 | -2.976587 | -2.282883 | 2.192465  |
| 71 | 1 | 0 | -2.634666 | -4.746521 | 1.812445  |
| 72 | 1 | 0 | -2.815004 | -4.358849 | 3.533916  |
| 73 | 1 | 0 | -4.160089 | -5.086681 | 2.651033  |
| 74 | 1 | 0 | -5.209527 | -1.458295 | 2.980612  |
| 75 | 1 | 0 | -5.704013 | -3.122049 | 3.343000  |
| 76 | 1 | 0 | -4.373730 | -2.383118 | 4.247950  |
| 77 | 1 | 0 | -4.336709 | 3.518829  | 3.315554  |
| 78 | 1 | 0 | -6.047070 | 4.305073  | 1.305356  |
| 79 | 7 | 0 | -3.581712 | 2.213100  | 1.771300  |
| 80 | 7 | 0 | -4.923977 | 2.840879  | 0.179115  |
| 81 | 6 | 0 | -2.512117 | 1.538695  | 2.555036  |
| 82 | 6 | 0 | -3.084456 | 0.993976  | 3.867297  |
| 83 | 6 | 0 | -1.335963 | 2.491930  | 2.784656  |
| 84 | 1 | 0 | -2.195789 | 0.699447  | 1.936149  |
| 85 | 1 | 0 | -3.957989 | 0.360811  | 3.689461  |
| 86 | 1 | 0 | -2.318300 | 0.389178  | 4.362336  |
| 87 | 1 | 0 | -3.367415 | 1.793505  | 4.561646  |
| 88 | 1 | 0 | -0.923964 | 2.846862  | 1.837330  |

|     |   |   |           |           |           |
|-----|---|---|-----------|-----------|-----------|
| 89  | 1 | 0 | -1.635200 | 3.353329  | 3.394542  |
| 90  | 1 | 0 | -0.542722 | 1.960024  | 3.319596  |
| 91  | 6 | 0 | -5.604631 | 3.003319  | -1.131059 |
| 92  | 6 | 0 | -5.381155 | 4.417868  | -1.674361 |
| 93  | 6 | 0 | -7.085744 | 2.632464  | -1.011037 |
| 94  | 1 | 0 | -5.103782 | 2.290032  | -1.788970 |
| 95  | 1 | 0 | -4.313019 | 4.641184  | -1.756967 |
| 96  | 1 | 0 | -5.825805 | 4.499443  | -2.671310 |
| 97  | 1 | 0 | -5.847342 | 5.179354  | -1.038907 |
| 98  | 1 | 0 | -7.208224 | 1.618918  | -0.615906 |
| 99  | 1 | 0 | -7.629324 | 3.324246  | -0.357437 |
| 100 | 1 | 0 | -7.553867 | 2.675522  | -1.999607 |
| 101 | 1 | 0 | 4.336758  | -3.518900 | -3.315426 |
| 102 | 1 | 0 | 6.047130  | -4.305030 | -1.305192 |
| 103 | 7 | 0 | 3.581711  | -2.213146 | -1.771219 |
| 104 | 7 | 0 | 4.923987  | -2.840831 | -0.179006 |
| 105 | 6 | 0 | 5.604637  | -3.003207 | 1.131178  |
| 106 | 6 | 0 | 7.085741  | -2.632314 | 1.011155  |
| 107 | 6 | 0 | 5.381196  | -4.417743 | 1.674529  |
| 108 | 1 | 0 | 5.103764  | -2.289911 | 1.789061  |
| 109 | 1 | 0 | 7.208195  | -1.618777 | 0.615992  |
| 110 | 1 | 0 | 7.553857  | -2.675326 | 1.999731  |
| 111 | 1 | 0 | 7.629346  | -3.324102 | 0.357583  |
| 112 | 1 | 0 | 4.313065  | -4.641083 | 1.757138  |
| 113 | 1 | 0 | 5.847405  | -5.179239 | 1.039102  |
| 114 | 1 | 0 | 5.825844  | -4.499272 | 2.671482  |
| 115 | 6 | 0 | 2.512099  | -1.538800 | -2.554983 |
| 116 | 6 | 0 | 1.335980  | -2.492082 | -2.784593 |
| 117 | 6 | 0 | 3.084432  | -0.994092 | -3.867250 |
| 118 | 1 | 0 | 2.195736  | -0.699547 | -1.936120 |
| 119 | 1 | 0 | 0.923985  | -2.847010 | -1.837264 |
| 120 | 1 | 0 | 0.542725  | -1.960215 | -3.319553 |
| 121 | 1 | 0 | 1.635255  | -3.353482 | -3.394460 |
| 122 | 1 | 0 | 3.957944  | -0.360894 | -3.689422 |
| 123 | 1 | 0 | 3.367423  | -1.793627 | -4.561579 |
| 124 | 1 | 0 | 2.318261  | -0.389330 | -4.362311 |
| 125 | 5 | 0 | -3.010069 | -0.923801 | -0.080347 |
| 126 | 5 | 0 | 3.010040  | 0.923823  | 0.080339  |

-----

**UWB97XD/6-31G\***

-----

| Center<br>Number | Atomic<br>Number | Atomic<br>Type | Coordinates (Angstroms) |   |   |
|------------------|------------------|----------------|-------------------------|---|---|
|                  |                  |                | X                       | Y | Z |



|    |    |   |           |           |           |
|----|----|---|-----------|-----------|-----------|
| 1  | 6  | 0 | 1.026485  | 1.898865  | -1.488307 |
| 2  | 6  | 0 | 1.613711  | 0.916775  | -0.624295 |
| 3  | 6  | 0 | 0.675874  | -0.050716 | -0.065269 |
| 4  | 6  | 0 | -0.690134 | -0.051414 | -0.394097 |
| 5  | 6  | 0 | -1.200869 | 0.928022  | -1.285502 |
| 6  | 6  | 0 | -0.316561 | 1.885443  | -1.820746 |
| 7  | 1  | 0 | 1.652500  | 2.685851  | -1.899633 |
| 8  | 6  | 0 | 1.169412  | -1.014000 | 0.835814  |
| 9  | 6  | 0 | -1.597490 | -1.000782 | 0.192275  |
| 10 | 1  | 0 | -0.702665 | 2.651231  | -2.491571 |
| 11 | 6  | 0 | -1.041126 | -1.977297 | 1.048101  |
| 12 | 6  | 0 | 0.312187  | -1.972103 | 1.387227  |
| 13 | 1  | 0 | -1.679848 | -2.750909 | 1.471559  |
| 14 | 1  | 0 | 0.696798  | -2.714325 | 2.083084  |
| 15 | 15 | 0 | -2.981557 | 0.826190  | -1.440417 |
| 16 | 15 | 0 | 2.935587  | -0.725811 | 1.169743  |
| 17 | 6  | 0 | 6.059935  | 2.937272  | -0.060268 |
| 18 | 6  | 0 | 5.722000  | 3.002581  | -1.362501 |
| 19 | 6  | 0 | 4.298031  | -3.726129 | -1.221495 |
| 20 | 6  | 0 | 5.175808  | -3.775539 | -0.193320 |
| 21 | 6  | 0 | -5.915968 | -2.506311 | 1.353261  |
| 22 | 6  | 0 | -6.323831 | -2.519013 | 0.065507  |
| 23 | 6  | 0 | -5.166879 | 3.093810  | 1.085385  |
| 24 | 6  | 0 | -3.960080 | 3.375250  | 1.619767  |
| 25 | 6  | 0 | -4.321380 | -1.485133 | 0.130289  |
| 26 | 6  | 0 | -3.621113 | 1.953000  | -0.072914 |
| 27 | 6  | 0 | 3.707475  | -2.141351 | 0.235666  |
| 28 | 6  | 0 | 4.234951  | 1.630162  | -0.350708 |
| 29 | 1  | 0 | 6.184460  | 3.538106  | -2.175852 |
| 30 | 1  | 0 | 6.861376  | 3.421474  | 0.471928  |
| 31 | 1  | 0 | -7.217154 | -2.929720 | -0.375266 |
| 32 | 1  | 0 | -6.398025 | -2.886236 | 2.239210  |
| 33 | 7  | 0 | -5.353024 | -1.878911 | -0.681071 |
| 34 | 7  | 0 | -4.686454 | -1.875917 | 1.389278  |
| 35 | 7  | 0 | 4.605384  | 2.203269  | -1.540766 |
| 36 | 7  | 0 | 5.158785  | 2.086542  | 0.560999  |
| 37 | 6  | 0 | 4.150299  | 1.746808  | -2.859197 |
| 38 | 6  | 0 | 5.205875  | 0.822524  | -3.467584 |
| 39 | 6  | 0 | 3.820599  | 2.926646  | -3.768265 |
| 40 | 1  | 0 | 3.241594  | 1.173459  | -2.668858 |
| 41 | 1  | 0 | 5.433481  | 0.002828  | -2.778050 |
| 42 | 1  | 0 | 4.842645  | 0.400116  | -4.409782 |
| 43 | 1  | 0 | 6.135485  | 1.363485  | -3.675924 |

|    |   |   |           |           |           |
|----|---|---|-----------|-----------|-----------|
| 44 | 1 | 0 | 3.108953  | 3.606607  | -3.292694 |
| 45 | 1 | 0 | 4.717878  | 3.497345  | -4.033485 |
| 46 | 1 | 0 | 3.377293  | 2.559800  | -4.698493 |
| 47 | 6 | 0 | 5.001296  | 1.969415  | 2.018691  |
| 48 | 6 | 0 | 3.915439  | 2.927183  | 2.507487  |
| 49 | 6 | 0 | 6.329011  | 2.180906  | 2.738626  |
| 50 | 1 | 0 | 4.672583  | 0.945262  | 2.207189  |
| 51 | 1 | 0 | 2.975909  | 2.725698  | 1.983691  |
| 52 | 1 | 0 | 3.754337  | 2.796583  | 3.582155  |
| 53 | 1 | 0 | 4.210211  | 3.966405  | 2.323303  |
| 54 | 1 | 0 | 7.121677  | 1.555718  | 2.315241  |
| 55 | 1 | 0 | 6.652309  | 3.226956  | 2.707642  |
| 56 | 1 | 0 | 6.207246  | 1.911865  | 3.791603  |
| 57 | 6 | 0 | -5.268639 | -1.912413 | -2.150977 |
| 58 | 6 | 0 | -6.642434 | -1.734781 | -2.787437 |
| 59 | 6 | 0 | -4.568958 | -3.194636 | -2.597671 |
| 60 | 1 | 0 | -4.646650 | -1.059154 | -2.428088 |
| 61 | 1 | 0 | -7.149009 | -0.842587 | -2.405872 |
| 62 | 1 | 0 | -6.522057 | -1.620504 | -3.867995 |
| 63 | 1 | 0 | -7.290468 | -2.602297 | -2.623069 |
| 64 | 1 | 0 | -3.576186 | -3.260256 | -2.142418 |
| 65 | 1 | 0 | -5.150654 | -4.076575 | -2.307446 |
| 66 | 1 | 0 | -4.453302 | -3.199948 | -3.685587 |
| 67 | 6 | 0 | -4.021081 | -1.423394 | 2.620643  |
| 68 | 6 | 0 | -3.973320 | -2.539179 | 3.658045  |
| 69 | 6 | 0 | -4.692377 | -0.152607 | 3.136318  |
| 70 | 1 | 0 | -3.000493 | -1.182483 | 2.326030  |
| 71 | 1 | 0 | -3.532598 | -3.447511 | 3.236863  |
| 72 | 1 | 0 | -3.356995 | -2.218816 | 4.502535  |
| 73 | 1 | 0 | -4.966569 | -2.781864 | 4.051621  |
| 74 | 1 | 0 | -4.667502 | 0.627857  | 2.369630  |
| 75 | 1 | 0 | -5.735884 | -0.338971 | 3.415170  |
| 76 | 1 | 0 | -4.162637 | 0.219101  | 4.018745  |
| 77 | 1 | 0 | -3.693679 | 4.011091  | 2.447589  |
| 78 | 1 | 0 | -6.151738 | 3.440743  | 1.351823  |
| 79 | 7 | 0 | -3.012253 | 2.672685  | 0.900538  |
| 80 | 7 | 0 | -4.946462 | 2.214202  | 0.045869  |
| 81 | 6 | 0 | -1.579915 | 2.667857  | 1.286945  |
| 82 | 6 | 0 | -1.377087 | 1.775344  | 2.506514  |
| 83 | 6 | 0 | -1.071034 | 4.091002  | 1.485733  |
| 84 | 1 | 0 | -1.051560 | 2.236869  | 0.444465  |
| 85 | 1 | 0 | -1.728040 | 0.761415  | 2.298335  |
| 86 | 1 | 0 | -0.308827 | 1.714733  | 2.733636  |
| 87 | 1 | 0 | -1.899638 | 2.169888  | 3.386648  |

|     |   |   |           |           |           |
|-----|---|---|-----------|-----------|-----------|
| 88  | 1 | 0 | -1.292642 | 4.712840  | 0.613655  |
| 89  | 1 | 0 | -1.485318 | 4.571179  | 2.379532  |
| 90  | 1 | 0 | 0.015187  | 4.052021  | 1.605269  |
| 91  | 6 | 0 | -6.020549 | 1.659084  | -0.796815 |
| 92  | 6 | 0 | -6.571677 | 2.737742  | -1.723619 |
| 93  | 6 | 0 | -7.087307 | 1.006799  | 0.077415  |
| 94  | 1 | 0 | -5.543940 | 0.888033  | -1.403700 |
| 95  | 1 | 0 | -5.774448 | 3.151526  | -2.347248 |
| 96  | 1 | 0 | -7.335579 | 2.308159  | -2.378488 |
| 97  | 1 | 0 | -7.032684 | 3.553006  | -1.155566 |
| 98  | 1 | 0 | -6.645795 | 0.269173  | 0.753353  |
| 99  | 1 | 0 | -7.633759 | 1.746560  | 0.672132  |
| 100 | 1 | 0 | -7.817125 | 0.495614  | -0.556821 |
| 101 | 1 | 0 | 4.234222  | -4.325850 | -2.114523 |
| 102 | 1 | 0 | 6.022289  | -4.420465 | -0.026499 |
| 103 | 7 | 0 | 3.407814  | -2.710953 | -0.954326 |
| 104 | 7 | 0 | 4.795566  | -2.801180 | 0.703541  |
| 105 | 6 | 0 | 5.556981  | -2.430520 | 1.912403  |
| 106 | 6 | 0 | 6.645105  | -1.426366 | 1.536152  |
| 107 | 6 | 0 | 6.105887  | -3.665969 | 2.616623  |
| 108 | 1 | 0 | 4.828852  | -1.942026 | 2.563876  |
| 109 | 1 | 0 | 6.214000  | -0.554579 | 1.032668  |
| 110 | 1 | 0 | 7.164836  | -1.086349 | 2.437139  |
| 111 | 1 | 0 | 7.382565  | -1.881578 | 0.865902  |
| 112 | 1 | 0 | 5.318101  | -4.401865 | 2.800932  |
| 113 | 1 | 0 | 6.911649  | -4.143077 | 2.048540  |
| 114 | 1 | 0 | 6.524780  | -3.365573 | 3.580825  |
| 115 | 6 | 0 | 2.335550  | -2.293654 | -1.883832 |
| 116 | 6 | 0 | 1.154731  | -3.254103 | -1.813432 |
| 117 | 6 | 0 | 2.891393  | -2.148845 | -3.296846 |
| 118 | 1 | 0 | 2.037003  | -1.305591 | -1.543029 |
| 119 | 1 | 0 | 0.771775  | -3.330044 | -0.793725 |
| 120 | 1 | 0 | 0.347779  | -2.874335 | -2.446762 |
| 121 | 1 | 0 | 1.434234  | -4.252106 | -2.171951 |
| 122 | 1 | 0 | 3.785025  | -1.520252 | -3.303065 |
| 123 | 1 | 0 | 3.133101  | -3.114321 | -3.755212 |
| 124 | 1 | 0 | 2.131455  | -1.669739 | -3.920461 |
| 125 | 5 | 0 | -3.030833 | -0.757649 | -0.277541 |
| 126 | 5 | 0 | 3.017748  | 0.727661  | -0.115149 |

-----  
**UM06-2X/6-31G\***

-----  
Center      Atomic      Atomic      Coordinates (Angstroms)

| Number | Number | Type | X         | Y         | Z         |
|--------|--------|------|-----------|-----------|-----------|
| 1      | 6      | 0    | 0.822996  | 2.308925  | -0.528388 |
| 2      | 6      | 0    | 1.507815  | 1.136722  | -0.115212 |
| 3      | 6      | 0    | 0.689866  | -0.032597 | 0.120600  |
| 4      | 6      | 0    | -0.704762 | -0.017565 | -0.099681 |
| 5      | 6      | 0    | -1.314652 | 1.159400  | -0.569274 |
| 6      | 6      | 0    | -0.547680 | 2.316814  | -0.774432 |
| 7      | 1      | 0    | 1.379706  | 3.233681  | -0.665672 |
| 8      | 6      | 0    | 1.309139  | -1.215610 | 0.575873  |
| 9      | 6      | 0    | -1.544270 | -1.179921 | 0.148235  |
| 10     | 1      | 0    | -1.022812 | 3.230932  | -1.126248 |
| 11     | 6      | 0    | -0.842752 | -2.360256 | 0.548237  |
| 12     | 6      | 0    | 0.525327  | -2.366285 | 0.779186  |
| 13     | 1      | 0    | -1.393583 | -3.287897 | 0.681467  |
| 14     | 1      | 0    | 0.999960  | -3.286772 | 1.117737  |
| 15     | 15     | 0    | -3.094269 | 0.882524  | -0.860098 |
| 16     | 15     | 0    | 3.079427  | -0.962618 | 0.853983  |
| 17     | 6      | 0    | 5.867540  | 3.193773  | 0.844956  |
| 18     | 6      | 0    | 5.400749  | 3.695675  | -0.319392 |
| 19     | 6      | 0    | 4.049170  | -3.042980 | -2.521323 |
| 20     | 6      | 0    | 4.918598  | -3.569458 | -1.624164 |
| 21     | 6      | 0    | -5.386115 | -3.764867 | 0.435274  |
| 22     | 6      | 0    | -5.916296 | -3.243766 | -0.691007 |
| 23     | 6      | 0    | -4.828077 | 3.712493  | 1.439638  |
| 24     | 6      | 0    | -4.022574 | 3.168576  | 2.385062  |
| 25     | 6      | 0    | -4.143569 | -1.956798 | -0.122450 |
| 26     | 6      | 0    | -3.714470 | 2.013316  | 0.498652  |
| 27     | 6      | 0    | 3.749548  | -1.965110 | -0.587953 |
| 28     | 6      | 0    | 4.121420  | 1.910752  | 0.209033  |
| 29     | 1      | 0    | 5.743646  | 4.532927  | -0.906250 |
| 30     | 1      | 0    | 6.681694  | 3.525441  | 1.467553  |
| 31     | 1      | 0    | -6.759144 | -3.569505 | -1.277332 |
| 32     | 1      | 0    | -5.691144 | -4.617907 | 1.020300  |
| 33     | 7      | 0    | -5.162622 | -2.131698 | -1.025249 |
| 34     | 7      | 0    | -4.301595 | -2.978205 | 0.781802  |
| 35     | 7      | 0    | 4.330364  | 2.910397  | -0.703901 |
| 36     | 7      | 0    | 5.090042  | 2.095208  | 1.160631  |
| 37     | 6      | 0    | 3.769663  | 2.932965  | -2.063689 |
| 38     | 6      | 0    | 4.807796  | 2.378689  | -3.038046 |
| 39     | 6      | 0    | 3.317284  | 4.338093  | -2.444179 |
| 40     | 1      | 0    | 2.905705  | 2.265623  | -2.033135 |
| 41     | 1      | 0    | 5.142604  | 1.389845  | -2.709566 |
| 42     | 1      | 0    | 4.379793  | 2.292338  | -4.041037 |

|    |   |   |           |           |           |
|----|---|---|-----------|-----------|-----------|
| 43 | 1 | 0 | 5.680883  | 3.037296  | -3.094710 |
| 44 | 1 | 0 | 2.630508  | 4.751123  | -1.701405 |
| 45 | 1 | 0 | 4.169040  | 5.019240  | -2.544450 |
| 46 | 1 | 0 | 2.806385  | 4.307067  | -3.410105 |
| 47 | 6 | 0 | 5.129089  | 1.383938  | 2.450779  |
| 48 | 6 | 0 | 4.022975  | 1.904730  | 3.365195  |
| 49 | 6 | 0 | 6.505442  | 1.496548  | 3.094689  |
| 50 | 1 | 0 | 4.937256  | 0.333249  | 2.221359  |
| 51 | 1 | 0 | 3.045899  | 1.799315  | 2.884579  |
| 52 | 1 | 0 | 4.016419  | 1.340108  | 4.301774  |
| 53 | 1 | 0 | 4.192523  | 2.961833  | 3.596264  |
| 54 | 1 | 0 | 7.300921  | 1.203428  | 2.403251  |
| 55 | 1 | 0 | 6.703208  | 2.511446  | 3.454103  |
| 56 | 1 | 0 | 6.543037  | 0.833112  | 3.962120  |
| 57 | 6 | 0 | -5.283654 | -1.388706 | -2.288671 |
| 58 | 6 | 0 | -6.688677 | -1.513516 | -2.865891 |
| 59 | 6 | 0 | -4.216466 | -1.855173 | -3.275644 |
| 60 | 1 | 0 | -5.105355 | -0.339088 | -2.041253 |
| 61 | 1 | 0 | -7.453757 | -1.256083 | -2.127487 |
| 62 | 1 | 0 | -6.783955 | -0.829135 | -3.712526 |
| 63 | 1 | 0 | -6.883618 | -2.523060 | -3.241541 |
| 64 | 1 | 0 | -3.220341 | -1.755108 | -2.835227 |
| 65 | 1 | 0 | -4.384515 | -2.904748 | -3.540016 |
| 66 | 1 | 0 | -4.261233 | -1.253876 | -4.188238 |
| 67 | 6 | 0 | -3.707997 | -2.997945 | 2.126617  |
| 68 | 6 | 0 | -3.236159 | -4.399511 | 2.496990  |
| 69 | 6 | 0 | -4.726286 | -2.453046 | 3.127457  |
| 70 | 1 | 0 | -2.851531 | -2.323174 | 2.077472  |
| 71 | 1 | 0 | -2.563398 | -4.807908 | 1.739063  |
| 72 | 1 | 0 | -2.704324 | -4.365247 | 3.451581  |
| 73 | 1 | 0 | -4.080438 | -5.087135 | 2.615822  |
| 74 | 1 | 0 | -5.089212 | -1.475268 | 2.796973  |
| 75 | 1 | 0 | -5.584893 | -3.126929 | 3.217521  |
| 76 | 1 | 0 | -4.270629 | -2.345587 | 4.116303  |
| 77 | 1 | 0 | -3.879856 | 3.432731  | 3.420777  |
| 78 | 1 | 0 | -5.518178 | 4.538094  | 1.497191  |
| 79 | 7 | 0 | -3.350102 | 2.123853  | 1.795698  |
| 80 | 7 | 0 | -4.633883 | 2.985814  | 0.285535  |
| 81 | 6 | 0 | -2.387968 | 1.254961  | 2.510309  |
| 82 | 6 | 0 | -3.011578 | 0.765145  | 3.813392  |
| 83 | 6 | 0 | -1.069124 | 1.983348  | 2.739497  |
| 84 | 1 | 0 | -2.241844 | 0.398960  | 1.850144  |
| 85 | 1 | 0 | -3.999549 | 0.331492  | 3.640200  |
| 86 | 1 | 0 | -2.366183 | -0.005633 | 4.243790  |

|     |   |   |           |           |           |
|-----|---|---|-----------|-----------|-----------|
| 87  | 1 | 0 | -3.102934 | 1.567798  | 4.553082  |
| 88  | 1 | 0 | -0.642887 | 2.341368  | 1.799823  |
| 89  | 1 | 0 | -1.205572 | 2.830280  | 3.422764  |
| 90  | 1 | 0 | -0.356444 | 1.288622  | 3.194055  |
| 91  | 6 | 0 | -5.261717 | 3.302164  | -1.016691 |
| 92  | 6 | 0 | -4.395757 | 4.306675  | -1.768425 |
| 93  | 6 | 0 | -6.691509 | 3.790732  | -0.818683 |
| 94  | 1 | 0 | -5.273653 | 2.358282  | -1.565311 |
| 95  | 1 | 0 | -3.400640 | 3.891465  | -1.951445 |
| 96  | 1 | 0 | -4.854528 | 4.545968  | -2.731670 |
| 97  | 1 | 0 | -4.294839 | 5.233155  | -1.193597 |
| 98  | 1 | 0 | -7.267073 | 3.103892  | -0.192397 |
| 99  | 1 | 0 | -6.722439 | 4.789686  | -0.372402 |
| 100 | 1 | 0 | -7.178805 | 3.857869  | -1.794335 |
| 101 | 1 | 0 | 3.881035  | -3.283642 | -3.558936 |
| 102 | 1 | 0 | 5.649398  | -4.354050 | -1.732883 |
| 103 | 7 | 0 | 3.343733  | -2.055093 | -1.874674 |
| 104 | 7 | 0 | 4.728054  | -2.890954 | -0.440719 |
| 105 | 6 | 0 | 5.416222  | -3.221710 | 0.827034  |
| 106 | 6 | 0 | 6.878482  | -3.565230 | 0.569558  |
| 107 | 6 | 0 | 4.662270  | -4.341834 | 1.534942  |
| 108 | 1 | 0 | 5.358338  | -2.313482 | 1.429589  |
| 109 | 1 | 0 | 7.373790  | -2.790441 | -0.021686 |
| 110 | 1 | 0 | 7.394910  | -3.650567 | 1.528737  |
| 111 | 1 | 0 | 6.987343  | -4.526267 | 0.057261  |
| 112 | 1 | 0 | 3.635578  | -4.033844 | 1.752346  |
| 113 | 1 | 0 | 4.638296  | -5.242598 | 0.912881  |
| 114 | 1 | 0 | 5.158858  | -4.586882 | 2.477684  |
| 115 | 6 | 0 | 2.304911  | -1.227708 | -2.529711 |
| 116 | 6 | 0 | 1.022363  | -2.026747 | -2.726953 |
| 117 | 6 | 0 | 2.845504  | -0.669710 | -3.842629 |
| 118 | 1 | 0 | 2.128517  | -0.400444 | -1.843353 |
| 119 | 1 | 0 | 0.650885  | -2.424350 | -1.780059 |
| 120 | 1 | 0 | 0.254371  | -1.366169 | -3.140406 |
| 121 | 1 | 0 | 1.182035  | -2.850991 | -3.432327 |
| 122 | 1 | 0 | 3.813787  | -0.183898 | -3.698739 |
| 123 | 1 | 0 | 2.951797  | -1.446933 | -4.606908 |
| 124 | 1 | 0 | 2.138643  | 0.071507  | -4.225736 |
| 125 | 5 | 0 | -3.010543 | -0.915173 | -0.118472 |
| 126 | 5 | 0 | 2.981520  | 0.871429  | 0.182150  |

-----  
**UBP86/6-31G\***  
-----

| Center<br>Number | Atomic<br>Number | Atomic<br>Type | Coordinates (Angstroms) |           |           |
|------------------|------------------|----------------|-------------------------|-----------|-----------|
|                  |                  |                | X                       | Y         | Z         |
| 1                | 6                | 0              | -0.814661               | 2.356962  | 0.540998  |
| 2                | 6                | 0              | -1.530985               | 1.171460  | 0.177233  |
| 3                | 6                | 0              | -0.708213               | -0.007450 | -0.075040 |
| 4                | 6                | 0              | 0.708201                | 0.007380  | 0.075077  |
| 5                | 6                | 0              | 1.347735                | 1.203163  | 0.510118  |
| 6                | 6                | 0              | 0.575964                | 2.367121  | 0.730619  |
| 7                | 1                | 0              | -1.360946               | 3.295746  | 0.688149  |
| 8                | 6                | 0              | -1.347750               | -1.203237 | -0.510064 |
| 9                | 6                | 0              | 1.530971                | -1.171528 | -0.177202 |
| 10               | 1                | 0              | 1.063812                | 3.294139  | 1.060113  |
| 11               | 6                | 0              | 0.814643                | -2.357033 | -0.540942 |
| 12               | 6                | 0              | -0.575985               | -2.367199 | -0.730550 |
| 13               | 1                | 0              | 1.360920                | -3.295825 | -0.688074 |
| 14               | 1                | 0              | -1.063831               | -3.294223 | -1.060028 |
| 15               | 15               | 0              | 3.125960                | 0.902392  | 0.809122  |
| 16               | 15               | 0              | -3.125974               | -0.902435 | -0.809081 |
| 17               | 6                | 0              | -6.015018               | 3.172540  | -0.755109 |
| 18               | 6                | 0              | -5.530598               | 3.727815  | 0.392061  |
| 19               | 6                | 0              | -4.441118               | -3.101459 | 2.401832  |
| 20               | 6                | 0              | -5.257126               | -3.560508 | 1.403558  |
| 21               | 6                | 0              | 5.530713                | -3.727738 | -0.392097 |
| 22               | 6                | 0              | 6.015061                | -3.172498 | 0.755123  |
| 23               | 6                | 0              | 5.257049                | 3.560474  | -1.403565 |
| 24               | 6                | 0              | 4.441033                | 3.101417  | -2.401831 |
| 25               | 6                | 0              | 4.186145                | -1.944702 | 0.124619  |
| 26               | 6                | 0              | 3.900492                | 1.974941  | -0.515330 |
| 27               | 6                | 0              | -3.900545               | -1.974988 | 0.515338  |
| 28               | 6                | 0              | -4.186129               | 1.944690  | -0.124621 |
| 29               | 1                | 0              | -5.892223               | 4.574957  | 0.969249  |
| 30               | 1                | 0              | -6.860418               | 3.465625  | -1.371187 |
| 31               | 1                | 0              | 6.860450                | -3.465574 | 1.371218  |
| 32               | 1                | 0              | 5.892406                | -4.574830 | -0.969315 |
| 33               | 7                | 0              | 5.208822                | -2.080521 | 1.068208  |
| 34               | 7                | 0              | 4.417631                | -2.984908 | -0.777712 |
| 35               | 7                | 0              | -4.417515               | 2.984971  | 0.777651  |
| 36               | 7                | 0              | -5.208828               | 2.080524  | -1.068189 |
| 37               | 6                | 0              | -3.806311               | 3.096969  | 2.121752  |
| 38               | 6                | 0              | -4.808852               | 2.635357  | 3.195485  |
| 39               | 6                | 0              | -3.302054               | 4.524825  | 2.382803  |
| 40               | 1                | 0              | -2.949683               | 2.403633  | 2.100706  |
| 41               | 1                | 0              | -5.183672               | 1.622652  | 2.968694  |

|    |   |   |           |           |           |
|----|---|---|-----------|-----------|-----------|
| 42 | 1 | 0 | -4.323695 | 2.616963  | 4.186796  |
| 43 | 1 | 0 | -5.676128 | 3.316985  | 3.255999  |
| 44 | 1 | 0 | -2.613687 | 4.862571  | 1.590312  |
| 45 | 1 | 0 | -4.136047 | 5.247455  | 2.445249  |
| 46 | 1 | 0 | -2.764658 | 4.558418  | 3.346007  |
| 47 | 6 | 0 | -5.214600 | 1.423770  | -2.399145 |
| 48 | 6 | 0 | -4.316086 | 2.201113  | -3.376352 |
| 49 | 6 | 0 | -6.645529 | 1.245085  | -2.925161 |
| 50 | 1 | 0 | -4.774153 | 0.425938  | -2.236397 |
| 51 | 1 | 0 | -3.293558 | 2.283123  | -2.970547 |
| 52 | 1 | 0 | -4.265948 | 1.676446  | -4.346495 |
| 53 | 1 | 0 | -4.711451 | 3.217936  | -3.552432 |
| 54 | 1 | 0 | -7.293071 | 0.745842  | -2.183535 |
| 55 | 1 | 0 | -7.112698 | 2.205787  | -3.207075 |
| 56 | 1 | 0 | -6.619236 | 0.622016  | -3.835240 |
| 57 | 6 | 0 | 5.214518  | -1.423805 | 2.399185  |
| 58 | 6 | 0 | 6.645424  | -1.244963 | 2.925209  |
| 59 | 6 | 0 | 4.316094  | -2.201285 | 3.376365  |
| 60 | 1 | 0 | 4.773953  | -0.426022 | 2.236459  |
| 61 | 1 | 0 | 7.292908  | -0.745620 | 2.183598  |
| 62 | 1 | 0 | 6.619055  | -0.621922 | 3.835306  |
| 63 | 1 | 0 | 7.112709  | -2.205616 | 3.207096  |
| 64 | 1 | 0 | 3.293577  | -2.283405 | 2.970555  |
| 65 | 1 | 0 | 4.711579  | -3.218067 | 3.552413  |
| 66 | 1 | 0 | 4.265891  | -1.676656 | 4.346526  |
| 67 | 6 | 0 | 3.806517  | -3.096833 | -2.121861 |
| 68 | 6 | 0 | 3.302388  | -4.524704 | -2.383069 |
| 69 | 6 | 0 | 4.809091  | -2.635032 | -3.195482 |
| 70 | 1 | 0 | 2.949832  | -2.403568 | -2.100810 |
| 71 | 1 | 0 | 2.614009  | -4.862577 | -1.590642 |
| 72 | 1 | 0 | 2.765041  | -4.558247 | -3.346302 |
| 73 | 1 | 0 | 4.136438  | -5.247265 | -2.445544 |
| 74 | 1 | 0 | 5.183767  | -1.622299 | -2.968578 |
| 75 | 1 | 0 | 5.676448  | -3.316557 | -3.255974 |
| 76 | 1 | 0 | 4.324012  | -2.616617 | -4.186831 |
| 77 | 1 | 0 | 4.382646  | 3.386070  | -3.449016 |
| 78 | 1 | 0 | 6.040676  | 4.313365  | -1.421866 |
| 79 | 7 | 0 | 3.619515  | 2.129337  | -1.852733 |
| 80 | 7 | 0 | 4.916719  | 2.868217  | -0.250038 |
| 81 | 6 | 0 | 2.572548  | 1.393197  | -2.616654 |
| 82 | 6 | 0 | 3.159846  | 0.848138  | -3.927139 |
| 83 | 6 | 0 | 1.351101  | 2.292867  | -2.855121 |
| 84 | 1 | 0 | 2.300069  | 0.544580  | -1.966436 |
| 85 | 1 | 0 | 4.071162  | 0.254476  | -3.746856 |



|     |   |   |           |           |           |
|-----|---|---|-----------|-----------|-----------|
| 86  | 1 | 0 | 2.411657  | 0.194441  | -4.406294 |
| 87  | 1 | 0 | 3.398367  | 1.652413  | -4.646487 |
| 88  | 1 | 0 | 0.929041  | 2.653792  | -1.903747 |
| 89  | 1 | 0 | 1.611992  | 3.158757  | -3.491780 |
| 90  | 1 | 0 | 0.570602  | 1.711527  | -3.374789 |
| 91  | 6 | 0 | 5.560764  | 3.099748  | 1.072093  |
| 92  | 6 | 0 | 5.319302  | 4.543519  | 1.537635  |
| 93  | 6 | 0 | 7.049025  | 2.724619  | 1.012892  |
| 94  | 1 | 0 | 5.030774  | 2.408577  | 1.751059  |
| 95  | 1 | 0 | 4.241118  | 4.773030  | 1.573987  |
| 96  | 1 | 0 | 5.734365  | 4.675926  | 2.551331  |
| 97  | 1 | 0 | 5.812207  | 5.278681  | 0.876462  |
| 98  | 1 | 0 | 7.184172  | 1.682722  | 0.676339  |
| 99  | 1 | 0 | 7.612640  | 3.385799  | 0.330218  |
| 100 | 1 | 0 | 7.494749  | 2.826001  | 2.017096  |
| 101 | 1 | 0 | -4.382740 | -3.386124 | 3.449016  |
| 102 | 1 | 0 | -6.040747 | -4.313406 | 1.421844  |
| 103 | 7 | 0 | -3.619572 | -2.129399 | 1.852744  |
| 104 | 7 | 0 | -4.916776 | -2.868252 | 0.250037  |
| 105 | 6 | 0 | -5.560815 | -3.099740 | -1.072104 |
| 106 | 6 | 0 | -7.049035 | -2.724445 | -1.012941 |
| 107 | 6 | 0 | -5.319510 | -4.543549 | -1.537610 |
| 108 | 1 | 0 | -5.030732 | -2.408640 | -1.751070 |
| 109 | 1 | 0 | -7.184071 | -1.682519 | -0.676433 |
| 110 | 1 | 0 | -7.494760 | -2.825819 | -2.017146 |
| 111 | 1 | 0 | -7.612727 | -3.385534 | -0.330242 |
| 112 | 1 | 0 | -4.241353 | -4.773196 | -1.573914 |
| 113 | 1 | 0 | -5.812535 | -5.278640 | -0.876448 |
| 114 | 1 | 0 | -5.734547 | -4.675922 | -2.551320 |
| 115 | 6 | 0 | -2.572604 | -1.393280 | 2.616681  |
| 116 | 6 | 0 | -1.351187 | -2.292982 | 2.855170  |
| 117 | 6 | 0 | -3.159918 | -0.848211 | 3.927153  |
| 118 | 1 | 0 | -2.300102 | -0.544663 | 1.966477  |
| 119 | 1 | 0 | -0.929133 | -2.653939 | 1.903805  |
| 120 | 1 | 0 | -0.570670 | -1.711658 | 3.374830  |
| 121 | 1 | 0 | -1.612105 | -3.158854 | 3.491845  |
| 122 | 1 | 0 | -4.071152 | -0.254438 | 3.746833  |
| 123 | 1 | 0 | -3.398576 | -1.652483 | 4.646459  |
| 124 | 1 | 0 | -2.411678 | -0.194616 | 4.406371  |
| 125 | 5 | 0 | 3.025130  | -0.929374 | 0.098316  |
| 126 | 5 | 0 | -3.025137 | 0.929336  | -0.098313 |

-----  
**2PB-b**

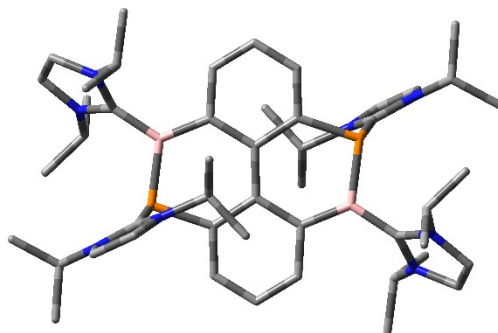

**UB3LYP/6-31G\***

| Center<br>Number | Atomic<br>Number | Atomic<br>Type | Coordinates (Angstroms) |           |           |
|------------------|------------------|----------------|-------------------------|-----------|-----------|
|                  |                  |                | X                       | Y         | Z         |
| 1                | 6                | 0              | 0.326900                | 2.828241  | 2.275157  |
| 2                | 6                | 0              | 1.386864                | 2.414262  | 1.504069  |
| 3                | 6                | 0              | 1.369687                | 1.255554  | 0.664066  |
| 4                | 6                | 0              | 0.078781                | 0.558831  | 0.470270  |
| 5                | 6                | 0              | -1.029985               | 1.075934  | 1.249215  |
| 6                | 6                | 0              | -0.876111               | 2.118228  | 2.168096  |
| 7                | 6                | 0              | -0.078666               | -0.558890 | -0.470715 |
| 8                | 6                | 0              | 1.030188                | -1.076057 | -1.249511 |
| 9                | 6                | 0              | 0.876268                | -2.118227 | -2.168566 |
| 10               | 1                | 0              | 1.731832                | -2.417496 | -2.769450 |
| 11               | 6                | 0              | -0.326845               | -2.827928 | -2.276071 |
| 12               | 6                | 0              | -1.386902               | -2.413873 | -1.505108 |
| 13               | 6                | 0              | -1.369600               | -1.255455 | -0.664766 |
| 14               | 1                | 0              | 0.410785                | 3.687721  | 2.936183  |
| 15               | 1                | 0              | 2.305269                | 2.993522  | 1.544485  |
| 16               | 1                | 0              | -1.731574               | 2.417384  | 2.769185  |
| 17               | 1                | 0              | -0.410782               | -3.687244 | -2.937303 |
| 18               | 1                | 0              | -2.305418               | -2.992925 | -1.545872 |
| 19               | 15               | 0              | 2.790802                | -0.591941 | -1.132819 |
| 20               | 15               | 0              | -2.790570               | 0.591523  | 1.132826  |
| 21               | 6                | 0              | -5.880495               | -2.714956 | -1.015639 |
| 22               | 6                | 0              | -5.892878               | -2.911980 | 0.324822  |
| 23               | 1                | 0              | -6.585590               | -3.019898 | -1.772209 |
| 24               | 1                | 0              | -6.604094               | -3.431835 | 0.946698  |
| 25               | 6                | 0              | -3.949374               | 3.543291  | -1.586963 |
| 26               | 6                | 0              | -4.955437               | 3.594119  | -0.677664 |
| 27               | 1                | 0              | -3.797728               | 4.109974  | -2.491554 |
| 28               | 1                | 0              | -5.841972               | 4.207141  | -0.648008 |
| 29               | 6                | 0              | 3.949057                | -3.542743 | 1.588612  |
| 30               | 6                | 0              | 4.955369                | -3.593840 | 0.679603  |

|    |   |   |           |           |           |
|----|---|---|-----------|-----------|-----------|
| 31 | 1 | 0 | 3.797242  | -4.109039 | 2.493418  |
| 32 | 1 | 0 | 5.841994  | -4.206758 | 0.650461  |
| 33 | 6 | 0 | 5.892936  | 2.911894  | -0.325783 |
| 34 | 6 | 0 | 5.880475  | 2.715223  | 1.014732  |
| 35 | 1 | 0 | 6.604183  | 3.431598  | -0.947751 |
| 36 | 1 | 0 | 6.585505  | 3.020397  | 1.771269  |
| 37 | 6 | 0 | -4.015972 | -1.736397 | -0.168095 |
| 38 | 6 | 0 | 3.485466  | -2.031845 | -0.012142 |
| 39 | 6 | 0 | 4.015998  | 1.736441  | 0.167330  |
| 40 | 6 | 0 | -3.485556 | 2.031639  | 0.012988  |
| 41 | 7 | 0 | 3.058131  | -2.575924 | 1.159634  |
| 42 | 7 | 0 | 4.658724  | -2.664730 | -0.302458 |
| 43 | 7 | 0 | 4.750169  | 2.319727  | -0.838128 |
| 44 | 7 | 0 | 4.731562  | 1.999065  | 1.312315  |
| 45 | 7 | 0 | -4.658659 | 2.664525  | 0.303894  |
| 46 | 7 | 0 | -3.058447 | 2.576172  | -1.158675 |
| 47 | 7 | 0 | -4.750122 | -2.319875 | 0.837263  |
| 48 | 7 | 0 | -4.731626 | -1.998680 | -1.313099 |
| 49 | 6 | 0 | 4.310364  | 2.465330  | -2.242940 |
| 50 | 6 | 0 | 5.306087  | 1.804483  | -3.198891 |
| 51 | 6 | 0 | 4.058966  | 3.941824  | -2.572684 |
| 52 | 1 | 0 | 3.360520  | 1.926751  | -2.284979 |
| 53 | 1 | 0 | 5.441669  | 0.748573  | -2.948194 |
| 54 | 1 | 0 | 4.928183  | 1.865310  | -4.224646 |
| 55 | 1 | 0 | 6.284005  | 2.300452  | -3.175703 |
| 56 | 1 | 0 | 3.337144  | 4.379165  | -1.875686 |
| 57 | 1 | 0 | 4.981003  | 4.532902  | -2.532140 |
| 58 | 1 | 0 | 3.654200  | 4.027795  | -3.586494 |
| 59 | 6 | 0 | 4.437756  | 1.436665  | 2.647919  |
| 60 | 6 | 0 | 4.387505  | 2.537217  | 3.711870  |
| 61 | 6 | 0 | 5.451868  | 0.338320  | 2.993336  |
| 62 | 1 | 0 | 3.445590  | 0.992679  | 2.545986  |
| 63 | 1 | 0 | 3.659686  | 3.309664  | 3.449508  |
| 64 | 1 | 0 | 4.091362  | 2.103241  | 4.672271  |
| 65 | 1 | 0 | 5.364832  | 3.013114  | 3.853696  |
| 66 | 1 | 0 | 5.458605  | -0.443883 | 2.227429  |
| 67 | 1 | 0 | 6.466670  | 0.742179  | 3.083511  |
| 68 | 1 | 0 | 5.191126  | -0.121453 | 3.952606  |
| 69 | 6 | 0 | 1.787206  | -2.259336 | 1.862962  |
| 70 | 6 | 0 | 2.041726  | -2.000821 | 3.350416  |
| 71 | 6 | 0 | 0.765192  | -3.374715 | 1.623812  |
| 72 | 1 | 0 | 1.426753  | -1.339838 | 1.407120  |
| 73 | 1 | 0 | 2.813187  | -1.238960 | 3.496916  |
| 74 | 1 | 0 | 1.116425  | -1.637017 | 3.807108  |

|     |   |   |           |           |           |
|-----|---|---|-----------|-----------|-----------|
| 75  | 1 | 0 | 2.340718  | -2.908370 | 3.887977  |
| 76  | 1 | 0 | 0.598837  | -3.530496 | 0.554968  |
| 77  | 1 | 0 | 1.091436  | -4.318811 | 2.077575  |
| 78  | 1 | 0 | -0.191118 | -3.090057 | 2.073466  |
| 79  | 6 | 0 | 5.507203  | -2.443331 | -1.501444 |
| 80  | 6 | 0 | 5.636151  | -3.737566 | -2.310206 |
| 81  | 6 | 0 | 6.860140  | -1.851169 | -1.095282 |
| 82  | 1 | 0 | 4.954062  | -1.709284 | -2.091112 |
| 83  | 1 | 0 | 4.651138  | -4.131827 | -2.578457 |
| 84  | 1 | 0 | 6.186831  | -3.534989 | -3.234383 |
| 85  | 1 | 0 | 6.183076  | -4.513656 | -1.762784 |
| 86  | 1 | 0 | 6.730151  | -0.914402 | -0.543580 |
| 87  | 1 | 0 | 7.437267  | -2.543019 | -0.470921 |
| 88  | 1 | 0 | 7.452835  | -1.641303 | -1.991664 |
| 89  | 6 | 0 | -4.310187 | -2.465972 | 2.241992  |
| 90  | 6 | 0 | -4.057953 | -3.942506 | 2.570920  |
| 91  | 6 | 0 | -5.306263 | -1.806191 | 3.198309  |
| 92  | 1 | 0 | -3.360657 | -1.926885 | 2.284323  |
| 93  | 1 | 0 | -3.335823 | -4.379014 | 1.873721  |
| 94  | 1 | 0 | -3.653217 | -4.028832 | 3.584712  |
| 95  | 1 | 0 | -4.979653 | -4.534078 | 2.529943  |
| 96  | 1 | 0 | -5.442608 | -0.750266 | 2.948073  |
| 97  | 1 | 0 | -6.283854 | -2.302797 | 3.175033  |
| 98  | 1 | 0 | -4.928214 | -1.867197 | 4.223999  |
| 99  | 6 | 0 | -4.437924 | -1.435982 | -2.648602 |
| 100 | 6 | 0 | -5.452206 | -0.337712 | -2.993760 |
| 101 | 6 | 0 | -4.387573 | -2.536315 | -3.712779 |
| 102 | 1 | 0 | -3.445803 | -0.991903 | -2.546605 |
| 103 | 1 | 0 | -5.459013 | 0.444358  | -2.227717 |
| 104 | 1 | 0 | -5.191597 | 0.122262  | -3.952968 |
| 105 | 1 | 0 | -6.466955 | -0.741697 | -3.083943 |
| 106 | 1 | 0 | -3.659635 | -3.308713 | -3.450613 |
| 107 | 1 | 0 | -5.364843 | -3.012313 | -3.854653 |
| 108 | 1 | 0 | -4.091534 | -2.102101 | -4.673105 |
| 109 | 6 | 0 | -1.787765 | 2.259803  | -1.862582 |
| 110 | 6 | 0 | -0.765660 | 3.375105  | -1.623478 |
| 111 | 6 | 0 | -2.042858 | 2.001831  | -3.350030 |
| 112 | 1 | 0 | -1.427150 | 1.340149  | -1.407182 |
| 113 | 1 | 0 | -0.598958 | 3.530633  | -0.554655 |
| 114 | 1 | 0 | 0.190501  | 3.090525  | -2.073495 |
| 115 | 1 | 0 | -1.092021 | 4.319311  | -2.076928 |
| 116 | 1 | 0 | -2.814291 | 1.239952  | -3.496526 |
| 117 | 1 | 0 | -2.342167 | 2.909560  | -3.887110 |
| 118 | 1 | 0 | -1.117695 | 1.638325  | -3.807239 |

|     |   |   |           |           |           |
|-----|---|---|-----------|-----------|-----------|
| 119 | 6 | 0 | -5.506831 | 2.442678  | 1.503012  |
| 120 | 6 | 0 | -6.860029 | 1.851060  | 1.096927  |
| 121 | 6 | 0 | -5.635225 | 3.736507  | 2.312511  |
| 122 | 1 | 0 | -4.953690 | 1.708178  | 2.092118  |
| 123 | 1 | 0 | -6.730426 | 0.914583  | 0.544641  |
| 124 | 1 | 0 | -7.452494 | 1.640815  | 1.993373  |
| 125 | 1 | 0 | -7.437194 | 2.543399  | 0.473145  |
| 126 | 1 | 0 | -4.650036 | 4.130370  | 2.580702  |
| 127 | 1 | 0 | -6.182095 | 4.513031  | 1.765649  |
| 128 | 1 | 0 | -6.185704 | 3.533577  | 3.236730  |
| 129 | 5 | 0 | -2.688827 | -0.909813 | -0.002256 |
| 130 | 5 | 0 | 2.688875  | 0.909818  | 0.001625  |

-----

**UWB97XD/6-31G\***

-----

| Center<br>Number | Atomic<br>Number | Atomic<br>Type | Coordinates (Angstroms) |           |           |
|------------------|------------------|----------------|-------------------------|-----------|-----------|
|                  |                  |                | X                       | Y         | Z         |
| 1                | 6                | 0              | 0.442751                | -2.445727 | -2.624055 |
| 2                | 6                | 0              | 1.457627                | -2.155120 | -1.761406 |
| 3                | 6                | 0              | 1.397181                | -1.136764 | -0.749698 |
| 4                | 6                | 0              | 0.102203                | -0.477022 | -0.523048 |
| 5                | 6                | 0              | -0.963193               | -0.876962 | -1.413391 |
| 6                | 6                | 0              | -0.780911               | -1.771848 | -2.456852 |
| 7                | 6                | 0              | -0.088927               | 0.479528  | 0.571277  |
| 8                | 6                | 0              | 0.987872                | 0.874121  | 1.448133  |
| 9                | 6                | 0              | 0.781773                | 1.741423  | 2.527749  |
| 10               | 1                | 0              | 1.623801                | 1.960287  | 3.179737  |
| 11               | 6                | 0              | -0.437837               | 2.370711  | 2.749993  |
| 12               | 6                | 0              | -1.470022               | 2.074671  | 1.887214  |
| 13               | 6                | 0              | -1.379218               | 1.119198  | 0.844539  |
| 14               | 1                | 0              | 0.561254                | -3.195201 | -3.402030 |
| 15               | 1                | 0              | 2.383512                | -2.718971 | -1.848839 |
| 16               | 1                | 0              | -1.612259               | -1.991447 | -3.121884 |
| 17               | 1                | 0              | -0.562696               | 3.084911  | 3.558725  |
| 18               | 1                | 0              | -2.413046               | 2.601783  | 2.015332  |
| 19               | 15               | 0              | 2.750927                | 0.458907  | 1.292104  |
| 20               | 15               | 0              | -2.716551               | -0.412661 | -1.290701 |
| 21               | 6                | 0              | -5.955087               | 2.141828  | 1.417032  |
| 22               | 6                | 0              | -5.963175               | 2.698978  | 0.184435  |
| 23               | 1                | 0              | -6.687826               | 2.178289  | 2.207042  |
| 24               | 1                | 0              | -6.700504               | 3.319653  | -0.298663 |
| 25               | 6                | 0              | -3.879041               | -3.612387 | 0.995255  |

|    |   |   |           |           |           |
|----|---|---|-----------|-----------|-----------|
| 26 | 6 | 0 | -4.923465 | -3.491876 | 0.142800  |
| 27 | 1 | 0 | -3.705340 | -4.316865 | 1.792098  |
| 28 | 1 | 0 | -5.833168 | -4.063762 | 0.064769  |
| 29 | 6 | 0 | 3.839908  | 3.568328  | -1.237443 |
| 30 | 6 | 0 | 4.902933  | 3.507493  | -0.402054 |
| 31 | 1 | 0 | 3.653364  | 4.206271  | -2.085920 |
| 32 | 1 | 0 | 5.818972  | 4.074883  | -0.392460 |
| 33 | 6 | 0 | 5.996480  | -2.668327 | -0.047706 |
| 34 | 6 | 0 | 5.940093  | -2.221442 | -1.321737 |
| 35 | 1 | 0 | 6.761573  | -3.229995 | 0.463661  |
| 36 | 1 | 0 | 6.650463  | -2.312897 | -2.127682 |
| 37 | 6 | 0 | -4.030525 | 1.570835  | 0.402589  |
| 38 | 6 | 0 | 3.414281  | 1.970612  | 0.270463  |
| 39 | 6 | 0 | 4.026583  | -1.597207 | -0.299356 |
| 40 | 6 | 0 | -3.431810 | -1.902653 | -0.369052 |
| 41 | 7 | 0 | 2.942354  | 2.610222  | -0.822094 |
| 42 | 7 | 0 | 4.623682  | 2.525538  | 0.525939  |
| 43 | 7 | 0 | 4.818855  | -2.289429 | 0.566833  |
| 44 | 7 | 0 | 4.731723  | -1.567909 | -1.467490 |
| 45 | 7 | 0 | -4.632467 | -2.439261 | -0.697908 |
| 46 | 7 | 0 | -2.977700 | -2.621531 | 0.681915  |
| 47 | 7 | 0 | -4.776542 | 2.346144  | -0.425584 |
| 48 | 7 | 0 | -4.765330 | 1.453412  | 1.539792  |
| 49 | 6 | 0 | 4.433824  | -2.663608 | 1.933230  |
| 50 | 6 | 0 | 5.307506  | -1.940453 | 2.953305  |
| 51 | 6 | 0 | 4.458455  | -4.181904 | 2.094774  |
| 52 | 1 | 0 | 3.401966  | -2.310645 | 2.025361  |
| 53 | 1 | 0 | 5.211072  | -0.857839 | 2.835448  |
| 54 | 1 | 0 | 4.990218  | -2.203067 | 3.966873  |
| 55 | 1 | 0 | 6.362308  | -2.220549 | 2.846492  |
| 56 | 1 | 0 | 3.837701  | -4.662002 | 1.332679  |
| 57 | 1 | 0 | 5.474737  | -4.584859 | 2.021582  |
| 58 | 1 | 0 | 4.066657  | -4.450759 | 3.080134  |
| 59 | 6 | 0 | 4.357909  | -0.763832 | -2.638124 |
| 60 | 6 | 0 | 4.353332  | -1.608531 | -3.907290 |
| 61 | 6 | 0 | 5.273673  | 0.454773  | -2.738406 |
| 62 | 1 | 0 | 3.339916  | -0.430432 | -2.425384 |
| 63 | 1 | 0 | 3.689071  | -2.469751 | -3.800179 |
| 64 | 1 | 0 | 3.995293  | -1.004741 | -4.746308 |
| 65 | 1 | 0 | 5.357300  | -1.967401 | -4.161287 |
| 66 | 1 | 0 | 5.237111  | 1.039735  | -1.814683 |
| 67 | 1 | 0 | 6.313240  | 0.160954  | -2.922094 |
| 68 | 1 | 0 | 4.955974  | 1.097224  | -3.565597 |
| 69 | 6 | 0 | 1.642863  | 2.348161  | -1.469339 |

|     |   |   |           |           |           |
|-----|---|---|-----------|-----------|-----------|
| 70  | 6 | 0 | 1.786337  | 2.306728  | -2.986271 |
| 71  | 6 | 0 | 0.603247  | 3.358237  | -0.996155 |
| 72  | 1 | 0 | 1.355463  | 1.354181  | -1.140110 |
| 73  | 1 | 0 | 2.589777  | 1.629312  | -3.289597 |
| 74  | 1 | 0 | 0.851423  | 1.928670  | -3.408937 |
| 75  | 1 | 0 | 1.974598  | 3.295313  | -3.420516 |
| 76  | 1 | 0 | 0.542835  | 3.369671  | 0.095385  |
| 77  | 1 | 0 | 0.839553  | 4.367418  | -1.355095 |
| 78  | 1 | 0 | -0.380274 | 3.068522  | -1.378821 |
| 79  | 6 | 0 | 5.564531  | 2.072695  | 1.569154  |
| 80  | 6 | 0 | 6.246857  | 3.259099  | 2.241105  |
| 81  | 6 | 0 | 6.554162  | 1.077382  | 0.967649  |
| 82  | 1 | 0 | 4.938424  | 1.556634  | 2.300256  |
| 83  | 1 | 0 | 5.513283  | 3.989511  | 2.593888  |
| 84  | 1 | 0 | 6.814650  | 2.900295  | 3.104014  |
| 85  | 1 | 0 | 6.954566  | 3.763128  | 1.573987  |
| 86  | 1 | 0 | 6.028347  | 0.221100  | 0.534127  |
| 87  | 1 | 0 | 7.158066  | 1.548225  | 0.183593  |
| 88  | 1 | 0 | 7.230252  | 0.706578  | 1.744050  |
| 89  | 6 | 0 | -4.344170 | 2.813171  | -1.751909 |
| 90  | 6 | 0 | -4.298538 | 4.338492  | -1.785788 |
| 91  | 6 | 0 | -5.226317 | 2.211628  | -2.840740 |
| 92  | 1 | 0 | -3.327201 | 2.424782  | -1.857903 |
| 93  | 1 | 0 | -3.668785 | 4.724966  | -0.979345 |
| 94  | 1 | 0 | -3.879736 | 4.669509  | -2.740360 |
| 95  | 1 | 0 | -5.297474 | 4.778222  | -1.691411 |
| 96  | 1 | 0 | -5.181991 | 1.119540  | -2.807223 |
| 97  | 1 | 0 | -6.269547 | 2.530480  | -2.733215 |
| 98  | 1 | 0 | -4.874426 | 2.537664  | -3.823633 |
| 99  | 6 | 0 | -4.413610 | 0.578350  | 2.668294  |
| 100 | 6 | 0 | -5.344861 | -0.631576 | 2.688623  |
| 101 | 6 | 0 | -4.414648 | 1.351407  | 3.982152  |
| 102 | 1 | 0 | -3.394720 | 0.250221  | 2.450055  |
| 103 | 1 | 0 | -5.310706 | -1.163141 | 1.733179  |
| 104 | 1 | 0 | -5.041570 | -1.324712 | 3.479007  |
| 105 | 1 | 0 | -6.381330 | -0.334453 | 2.883432  |
| 106 | 1 | 0 | -3.739292 | 2.209049  | 3.931716  |
| 107 | 1 | 0 | -5.417528 | 1.706114  | 4.244937  |
| 108 | 1 | 0 | -4.072673 | 0.696435  | 4.788586  |
| 109 | 6 | 0 | -1.690825 | -2.425394 | 1.384757  |
| 110 | 6 | 0 | -0.660587 | -3.437208 | 0.897312  |
| 111 | 6 | 0 | -1.887183 | -2.459837 | 2.896051  |
| 112 | 1 | 0 | -1.364284 | -1.427067 | 1.111049  |
| 113 | 1 | 0 | -0.581208 | -3.416474 | -0.192068 |

|     |   |   |           |           |           |
|-----|---|---|-----------|-----------|-----------|
| 114 | 1 | 0 | 0.320352  | -3.170137 | 1.301787  |
| 115 | 1 | 0 | -0.917559 | -4.452525 | 1.223302  |
| 116 | 1 | 0 | -2.676422 | -1.772938 | 3.214448  |
| 117 | 1 | 0 | -2.122521 | -3.463470 | 3.267850  |
| 118 | 1 | 0 | -0.953784 | -2.141314 | 3.367750  |
| 119 | 6 | 0 | -5.549750 | -1.917577 | -1.730552 |
| 120 | 6 | 0 | -6.545634 | -0.953381 | -1.090012 |
| 121 | 6 | 0 | -6.225850 | -3.056489 | -2.485714 |
| 122 | 1 | 0 | -4.906787 | -1.364523 | -2.419050 |
| 123 | 1 | 0 | -6.025187 | -0.128013 | -0.594557 |
| 124 | 1 | 0 | -7.203701 | -0.532498 | -1.856153 |
| 125 | 1 | 0 | -7.168058 | -1.466814 | -0.348537 |
| 126 | 1 | 0 | -5.490710 | -3.772244 | -2.863982 |
| 127 | 1 | 0 | -6.954250 | -3.590380 | -1.866031 |
| 128 | 1 | 0 | -6.769252 | -2.641708 | -3.339011 |
| 129 | 5 | 0 | -2.660558 | 0.883633  | 0.067855  |
| 130 | 5 | 0 | 2.664135  | -0.898487 | 0.016277  |

-----

**UM06-2X/6-31G\***

-----

| Center<br>Number | Atomic<br>Number | Atomic<br>Type | Coordinates (Angstroms) |           |           |
|------------------|------------------|----------------|-------------------------|-----------|-----------|
|                  |                  |                | X                       | Y         | Z         |
| 1                | 6                | 0              | 0.417877                | 2.332745  | 2.792105  |
| 2                | 6                | 0              | 1.463088                | 2.030683  | 1.941764  |
| 3                | 6                | 0              | 1.368460                | 1.098259  | 0.882707  |
| 4                | 6                | 0              | 0.081386                | 0.470806  | 0.586481  |
| 5                | 6                | 0              | -1.006332               | 0.862584  | 1.451773  |
| 6                | 6                | 0              | -0.804165               | 1.722700  | 2.541669  |
| 7                | 6                | 0              | -0.096220               | -0.485635 | -0.518373 |
| 8                | 6                | 0              | 0.976871                | -0.891414 | -1.394110 |
| 9                | 6                | 0              | 0.806714                | -1.795446 | -2.433768 |
| 10               | 1                | 0              | 1.644994                | -2.019979 | -3.088079 |
| 11               | 6                | 0              | -0.421647               | -2.459615 | -2.615290 |
| 12               | 6                | 0              | -1.449062               | -2.153652 | -1.771475 |
| 13               | 6                | 0              | -1.391359               | -1.136659 | -0.755690 |
| 14               | 1                | 0              | 0.538970                | 3.034729  | 3.611561  |
| 15               | 1                | 0              | 2.414211                | 2.539039  | 2.092926  |
| 16               | 1                | 0              | -1.654122               | 1.944170  | 3.182284  |
| 17               | 1                | 0              | -0.535840               | -3.210074 | -3.392791 |
| 18               | 1                | 0              | -2.382845               | -2.703546 | -1.875462 |
| 19               | 15               | 0              | 2.729746                | -0.398344 | -1.282900 |
| 20               | 15               | 0              | -2.773919               | 0.440211  | 1.295428  |



|    |   |   |           |           |           |
|----|---|---|-----------|-----------|-----------|
| 21 | 6 | 0 | -5.941472 | -2.249873 | -1.309025 |
| 22 | 6 | 0 | -6.000688 | -2.670720 | -0.024071 |
| 23 | 1 | 0 | -6.651449 | -2.354298 | -2.114419 |
| 24 | 1 | 0 | -6.768266 | -3.218574 | 0.499616  |
| 25 | 6 | 0 | -3.836867 | 3.585651  | -1.259774 |
| 26 | 6 | 0 | -4.905602 | 3.540665  | -0.425940 |
| 27 | 1 | 0 | -3.641326 | 4.211862  | -2.115833 |
| 28 | 1 | 0 | -5.817664 | 4.115312  | -0.423816 |
| 29 | 6 | 0 | 3.885559  | -3.627256 | 0.980776  |
| 30 | 6 | 0 | 4.925004  | -3.518519 | 0.116030  |
| 31 | 1 | 0 | 3.707948  | -4.330749 | 1.778581  |
| 32 | 1 | 0 | 5.825182  | -4.103900 | 0.023957  |
| 33 | 6 | 0 | 5.949361  | 2.718022  | 0.150752  |
| 34 | 6 | 0 | 5.958115  | 2.176412  | 1.392524  |
| 35 | 1 | 0 | 6.678519  | 3.334703  | -0.350786 |
| 36 | 1 | 0 | 6.700195  | 2.224587  | 2.173848  |
| 37 | 6 | 0 | -4.022658 | -1.614915 | -0.297752 |
| 38 | 6 | 0 | 3.447884  | -1.907229 | -0.376684 |
| 39 | 6 | 0 | 4.020052  | 1.590257  | 0.410082  |
| 40 | 6 | 0 | -3.426687 | 2.000377  | 0.271573  |
| 41 | 7 | 0 | 2.996052  | -2.623766 | 0.676233  |
| 42 | 7 | 0 | 4.638301  | -2.459627 | -0.718427 |
| 43 | 7 | 0 | 4.754387  | 2.356956  | -0.437975 |
| 44 | 7 | 0 | 4.769141  | 1.491728  | 1.539656  |
| 45 | 7 | 0 | -4.633701 | 2.567007  | 0.513736  |
| 46 | 7 | 0 | -2.949182 | 2.626481  | -0.825581 |
| 47 | 7 | 0 | -4.819955 | -2.286973 | 0.581713  |
| 48 | 7 | 0 | -4.727695 | -1.609435 | -1.466603 |
| 49 | 6 | 0 | 4.317262  | 2.806581  | -1.771734 |
| 50 | 6 | 0 | 5.183587  | 2.170389  | -2.852664 |
| 51 | 6 | 0 | 4.313683  | 4.330995  | -1.833197 |
| 52 | 1 | 0 | 3.291454  | 2.438190  | -1.863337 |
| 53 | 1 | 0 | 5.101555  | 1.080478  | -2.815630 |
| 54 | 1 | 0 | 4.850112  | 2.506609  | -3.838031 |
| 55 | 1 | 0 | 6.235053  | 2.456354  | -2.735094 |
| 56 | 1 | 0 | 3.707006  | 4.750862  | -1.026623 |
| 57 | 1 | 0 | 5.327102  | 4.739001  | -1.759711 |
| 58 | 1 | 0 | 3.894325  | 4.655326  | -2.789001 |
| 59 | 6 | 0 | 4.443139  | 0.615821  | 2.678581  |
| 60 | 6 | 0 | 4.556334  | 1.375266  | 3.994165  |
| 61 | 6 | 0 | 5.333016  | -0.623549 | 2.627268  |
| 62 | 1 | 0 | 3.400830  | 0.327604  | 2.517862  |
| 63 | 1 | 0 | 3.922644  | 2.265710  | 3.987117  |
| 64 | 1 | 0 | 4.231384  | 0.729368  | 4.814009  |

|     |   |   |           |           |           |
|-----|---|---|-----------|-----------|-----------|
| 65  | 1 | 0 | 5.588810  | 1.677530  | 4.199045  |
| 66  | 1 | 0 | 5.199260  | -1.153219 | 1.677846  |
| 67  | 1 | 0 | 6.389661  | -0.352159 | 2.728607  |
| 68  | 1 | 0 | 5.080378  | -1.305673 | 3.444314  |
| 69  | 6 | 0 | 1.718882  | -2.400047 | 1.391994  |
| 70  | 6 | 0 | 1.931420  | -2.473173 | 2.899012  |
| 71  | 6 | 0 | 0.655612  | -3.373528 | 0.899163  |
| 72  | 1 | 0 | 1.428960  | -1.385014 | 1.135392  |
| 73  | 1 | 0 | 2.746372  | -1.818103 | 3.221401  |
| 74  | 1 | 0 | 1.013205  | -2.139322 | 3.389102  |
| 75  | 1 | 0 | 2.140671  | -3.492247 | 3.241529  |
| 76  | 1 | 0 | 0.571663  | -3.341066 | -0.190065 |
| 77  | 1 | 0 | 0.888822  | -4.397022 | 1.216383  |
| 78  | 1 | 0 | -0.314672 | -3.082331 | 1.314620  |
| 79  | 6 | 0 | 5.559483  | -1.929382 | -1.746062 |
| 80  | 6 | 0 | 6.338375  | -3.057243 | -2.410939 |
| 81  | 6 | 0 | 6.471207  | -0.883770 | -1.108777 |
| 82  | 1 | 0 | 4.912663  | -1.449228 | -2.484505 |
| 83  | 1 | 0 | 5.670673  | -3.843830 | -2.771731 |
| 84  | 1 | 0 | 6.884270  | -2.651836 | -3.266202 |
| 85  | 1 | 0 | 7.076817  | -3.498333 | -1.733928 |
| 86  | 1 | 0 | 5.882168  | -0.071898 | -0.667342 |
| 87  | 1 | 0 | 7.084032  | -1.337580 | -0.321853 |
| 88  | 1 | 0 | 7.138775  | -0.456356 | -1.862824 |
| 89  | 6 | 0 | -4.448249 | -2.634343 | 1.960956  |
| 90  | 6 | 0 | -4.518184 | -4.146318 | 2.157923  |
| 91  | 6 | 0 | -5.318348 | -1.872604 | 2.954776  |
| 92  | 1 | 0 | -3.409260 | -2.301404 | 2.050733  |
| 93  | 1 | 0 | -3.910626 | -4.663451 | 1.410559  |
| 94  | 1 | 0 | -4.140893 | -4.402554 | 3.151495  |
| 95  | 1 | 0 | -5.546894 | -4.515535 | 2.089011  |
| 96  | 1 | 0 | -5.188583 | -0.794722 | 2.825356  |
| 97  | 1 | 0 | -6.377229 | -2.126847 | 2.826756  |
| 98  | 1 | 0 | -5.029374 | -2.133209 | 3.976820  |
| 99  | 6 | 0 | -4.355883 | -0.817499 | -2.648485 |
| 100 | 6 | 0 | -5.226971 | 0.435533  | -2.707151 |
| 101 | 6 | 0 | -4.439347 | -1.660057 | -3.915005 |
| 102 | 1 | 0 | -3.317396 | -0.526747 | -2.472104 |
| 103 | 1 | 0 | -5.107063 | 1.024041  | -1.790868 |
| 104 | 1 | 0 | -4.941202 | 1.058175  | -3.560500 |
| 105 | 1 | 0 | -6.285526 | 0.175068  | -2.818130 |
| 106 | 1 | 0 | -3.815864 | -2.553811 | -3.829762 |
| 107 | 1 | 0 | -5.468561 | -1.967841 | -4.129490 |
| 108 | 1 | 0 | -4.084914 | -1.073833 | -4.767103 |

|     |   |   |           |           |           |
|-----|---|---|-----------|-----------|-----------|
| 109 | 6 | 0 | -1.649351 | 2.327296  | -1.457169 |
| 110 | 6 | 0 | -0.581524 | 3.292588  | -0.955660 |
| 111 | 6 | 0 | -1.774508 | 2.323030  | -2.975363 |
| 112 | 1 | 0 | -1.414318 | 1.315462  | -1.137047 |
| 113 | 1 | 0 | -0.537693 | 3.291741  | 0.137456  |
| 114 | 1 | 0 | 0.396995  | 2.972734  | -1.329670 |
| 115 | 1 | 0 | -0.781250 | 4.311147  | -1.309317 |
| 116 | 1 | 0 | -2.601173 | 1.684606  | -3.301374 |
| 117 | 1 | 0 | -1.919864 | 3.328410  | -3.385565 |
| 118 | 1 | 0 | -0.849248 | 1.919894  | -3.395714 |
| 119 | 6 | 0 | -5.588397 | 2.109148  | 1.544182  |
| 120 | 6 | 0 | -6.486742 | 1.028047  | 0.948269  |
| 121 | 6 | 0 | -6.379890 | 3.281364  | 2.110437  |
| 122 | 1 | 0 | -4.966614 | 1.672922  | 2.329531  |
| 123 | 1 | 0 | -5.887911 | 0.186852  | 0.580987  |
| 124 | 1 | 0 | -7.180972 | 0.653673  | 1.706664  |
| 125 | 1 | 0 | -7.071046 | 1.431497  | 0.113417  |
| 126 | 1 | 0 | -5.717597 | 4.084891  | 2.443083  |
| 127 | 1 | 0 | -7.089580 | 3.684870  | 1.381063  |
| 128 | 1 | 0 | -6.959613 | 2.935612  | 2.969809  |
| 129 | 5 | 0 | -2.663046 | -0.900395 | 0.007341  |
| 130 | 5 | 0 | 2.654771  | 0.878801  | 0.096449  |

-----

**UBP86/6-31G\***

| Center<br>Number | Atomic<br>Number | Atomic<br>Type | Coordinates (Angstroms) |           |           |
|------------------|------------------|----------------|-------------------------|-----------|-----------|
|                  |                  |                | X                       | Y         | Z         |
| 1                | 6                | 0              | 0.307474                | -2.975327 | -2.114368 |
| 2                | 6                | 0              | 1.379852                | -2.514256 | -1.370124 |
| 3                | 6                | 0              | 1.369123                | -1.298156 | -0.604300 |
| 4                | 6                | 0              | 0.075809                | -0.587419 | -0.442234 |
| 5                | 6                | 0              | -1.041022               | -1.145830 | -1.187339 |
| 6                | 6                | 0              | -0.896283               | -2.248404 | -2.050310 |
| 7                | 6                | 0              | -0.075821               | 0.587377  | 0.442317  |
| 8                | 6                | 0              | 1.041014                | 1.145801  | 1.187405  |
| 9                | 6                | 0              | 0.896281                | 2.248393  | 2.050354  |
| 10               | 1                | 0              | 1.764745                | 2.576285  | 2.634963  |
| 11               | 6                | 0              | -0.307472               | 2.975324  | 2.114398  |
| 12               | 6                | 0              | -1.379852               | 2.514242  | 1.370164  |
| 13               | 6                | 0              | -1.369132               | 1.298123  | 0.604370  |
| 14               | 1                | 0              | 0.385300                | -3.883629 | -2.723854 |
| 15               | 1                | 0              | 2.305575                | -3.102192 | -1.372102 |

|    |    |   |           |           |           |
|----|----|---|-----------|-----------|-----------|
| 16 | 1  | 0 | -1.764742 | -2.576284 | -2.634933 |
| 17 | 1  | 0 | -0.385292 | 3.883641  | 2.723861  |
| 18 | 1  | 0 | -2.305571 | 3.102186  | 1.372124  |
| 19 | 15 | 0 | 2.809530  | 0.650654  | 1.090473  |
| 20 | 15 | 0 | -2.809535 | -0.650673 | -1.090422 |
| 21 | 6  | 0 | -5.890509 | 2.803904  | 0.901547  |
| 22 | 6  | 0 | -5.929372 | 2.888947  | -0.461726 |
| 23 | 1  | 0 | -6.586277 | 3.173817  | 1.650438  |
| 24 | 1  | 0 | -6.657581 | 3.360385  | -1.117093 |
| 25 | 6  | 0 | -3.971282 | -3.417389 | 1.811139  |
| 26 | 6  | 0 | -4.966280 | -3.552949 | 0.880934  |
| 27 | 1  | 0 | -3.830814 | -3.912798 | 2.768486  |
| 28 | 1  | 0 | -5.853945 | -4.180633 | 0.881934  |
| 29 | 6  | 0 | 3.971228  | 3.417346  | -1.811128 |
| 30 | 6  | 0 | 4.966267  | 3.552880  | -0.880963 |
| 31 | 1  | 0 | 3.830737  | 3.912757  | -2.768471 |
| 32 | 1  | 0 | 5.853951  | 4.180538  | -0.882000 |
| 33 | 6  | 0 | 5.929445  | -2.888882 | 0.461609  |
| 34 | 6  | 0 | 5.890527  | -2.803798 | -0.901659 |
| 35 | 1  | 0 | 6.657695  | -3.360317 | 1.116934  |
| 36 | 1  | 0 | 6.586279  | -3.173665 | -1.650589 |
| 37 | 6  | 0 | -4.029197 | 1.747852  | 0.096153  |
| 38 | 6  | 0 | 3.488386  | 2.020963  | -0.094074 |
| 39 | 6  | 0 | 4.029211  | -1.747833 | -0.096161 |
| 40 | 6  | 0 | -3.488411 | -2.020989 | 0.094106  |
| 41 | 7  | 0 | 3.079050  | 2.472480  | -1.324142 |
| 42 | 7  | 0 | 4.658125  | 2.696557  | 0.168249  |
| 43 | 7  | 0 | 4.791621  | -2.253782 | 0.946406  |
| 44 | 7  | 0 | 4.730944  | -2.111867 | -1.236455 |
| 45 | 7  | 0 | -4.658119 | -2.696617 | -0.168265 |
| 46 | 7  | 0 | -3.079112 | -2.472496 | 1.324191  |
| 47 | 7  | 0 | -4.791549 | 2.253795  | -0.946459 |
| 48 | 7  | 0 | -4.730962 | 2.111944  | 1.236409  |
| 49 | 6  | 0 | 4.366086  | -2.292939 | 2.366993  |
| 50 | 6  | 0 | 5.354804  | -1.527395 | 3.256399  |
| 51 | 6  | 0 | 4.154267  | -3.747067 | 2.821587  |
| 52 | 1  | 0 | 3.393929  | -1.768287 | 2.366388  |
| 53 | 1  | 0 | 5.453694  | -0.482688 | 2.918255  |
| 54 | 1  | 0 | 4.988882  | -1.517985 | 4.297493  |
| 55 | 1  | 0 | 6.355110  | -1.998432 | 3.257257  |
| 56 | 1  | 0 | 3.439363  | -4.266477 | 2.161319  |
| 57 | 1  | 0 | 5.100040  | -4.318099 | 2.830328  |
| 58 | 1  | 0 | 3.749463  | -3.757682 | 3.848280  |
| 59 | 6  | 0 | 4.412999  | -1.648983 | -2.609116 |

|     |   |   |           |           |           |
|-----|---|---|-----------|-----------|-----------|
| 60  | 6 | 0 | 4.349001  | -2.829970 | -3.588823 |
| 61  | 6 | 0 | 5.422635  | -0.574994 | -3.050496 |
| 62  | 1 | 0 | 3.410929  | -1.196665 | -2.517373 |
| 63  | 1 | 0 | 3.623537  | -3.589317 | -3.254369 |
| 64  | 1 | 0 | 4.032771  | -2.468072 | -4.582028 |
| 65  | 1 | 0 | 5.334014  | -3.315726 | -3.712302 |
| 66  | 1 | 0 | 5.436028  | 0.269648  | -2.340784 |
| 67  | 1 | 0 | 6.445287  | -0.986862 | -3.122095 |
| 68  | 1 | 0 | 5.148197  | -0.187916 | -4.047351 |
| 69  | 6 | 0 | 1.810666  | 2.093797  | -2.009170 |
| 70  | 6 | 0 | 2.064061  | 1.791928  | -3.492655 |
| 71  | 6 | 0 | 0.757079  | 3.191088  | -1.797901 |
| 72  | 1 | 0 | 1.481557  | 1.170087  | -1.510288 |
| 73  | 1 | 0 | 2.868107  | 1.048175  | -3.622164 |
| 74  | 1 | 0 | 1.141315  | 1.376425  | -3.930665 |
| 75  | 1 | 0 | 2.324815  | 2.698060  | -4.069448 |
| 76  | 1 | 0 | 0.597807  | 3.383873  | -0.724680 |
| 77  | 1 | 0 | 1.054583  | 4.132688  | -2.296025 |
| 78  | 1 | 0 | -0.203835 | 2.859356  | -2.225875 |
| 79  | 6 | 0 | 5.472579  | 2.588156  | 1.410660  |
| 80  | 6 | 0 | 5.503350  | 3.936724  | 2.145247  |
| 81  | 6 | 0 | 6.871547  | 2.043129  | 1.087559  |
| 82  | 1 | 0 | 4.921453  | 1.852354  | 2.022715  |
| 83  | 1 | 0 | 4.482111  | 4.294160  | 2.359397  |
| 84  | 1 | 0 | 6.036476  | 3.820151  | 3.104301  |
| 85  | 1 | 0 | 6.030645  | 4.713444  | 1.562603  |
| 86  | 1 | 0 | 6.810195  | 1.066313  | 0.578461  |
| 87  | 1 | 0 | 7.445391  | 2.736043  | 0.445968  |
| 88  | 1 | 0 | 7.440681  | 1.910052  | 2.023581  |
| 89  | 6 | 0 | -4.365957 | 2.292892  | -2.367030 |
| 90  | 6 | 0 | -4.154069 | 3.746998  | -2.821663 |
| 91  | 6 | 0 | -5.354663 | 1.527352  | -3.256452 |
| 92  | 1 | 0 | -3.393817 | 1.768208  | -2.366368 |
| 93  | 1 | 0 | -3.439176 | 4.266406  | -2.161381 |
| 94  | 1 | 0 | -3.749221 | 3.757566  | -3.848339 |
| 95  | 1 | 0 | -5.099823 | 4.318061  | -2.830464 |
| 96  | 1 | 0 | -5.453601 | 0.482658  | -2.918278 |
| 97  | 1 | 0 | -6.354955 | 1.998422  | -3.257364 |
| 98  | 1 | 0 | -4.988701 | 1.517897  | -4.297530 |
| 99  | 6 | 0 | -4.413084 | 1.649098  | 2.609098  |
| 100 | 6 | 0 | -5.422780 | 0.575166  | 3.050481  |
| 101 | 6 | 0 | -4.349077 | 2.830118  | 3.588764  |
| 102 | 1 | 0 | -3.411029 | 1.196738  | 2.517408  |
| 103 | 1 | 0 | -5.436181 | -0.269503 | 2.340801  |

|     |   |   |           |           |           |
|-----|---|---|-----------|-----------|-----------|
| 104 | 1 | 0 | -5.148394 | 0.188114  | 4.047360  |
| 105 | 1 | 0 | -6.445418 | 0.987078  | 3.122027  |
| 106 | 1 | 0 | -3.623571 | 3.589424  | 3.254309  |
| 107 | 1 | 0 | -5.334075 | 3.315917  | 3.712190  |
| 108 | 1 | 0 | -4.032897 | 2.468245  | 4.581994  |
| 109 | 6 | 0 | -1.810767 | -2.093779 | 2.009273  |
| 110 | 6 | 0 | -0.757136 | -3.191035 | 1.798037  |
| 111 | 6 | 0 | -2.064231 | -1.791932 | 3.492751  |
| 112 | 1 | 0 | -1.481665 | -1.170055 | 1.510412  |
| 113 | 1 | 0 | -0.597814 | -3.383804 | 0.724821  |
| 114 | 1 | 0 | 0.203749  | -2.859277 | 2.226054  |
| 115 | 1 | 0 | -1.054631 | -4.132649 | 2.296139  |
| 116 | 1 | 0 | -2.868304 | -1.048203 | 3.622234  |
| 117 | 1 | 0 | -2.324983 | -2.698077 | 4.069523  |
| 118 | 1 | 0 | -1.141514 | -1.376406 | 3.930802  |
| 119 | 6 | 0 | -5.472528 | -2.588234 | -1.410707 |
| 120 | 6 | 0 | -6.871518 | -2.043230 | -1.087661 |
| 121 | 6 | 0 | -5.503248 | -3.936804 | -2.145292 |
| 122 | 1 | 0 | -4.921391 | -1.852424 | -2.022743 |
| 123 | 1 | 0 | -6.810202 | -1.066410 | -0.578565 |
| 124 | 1 | 0 | -7.440620 | -1.910168 | -2.023705 |
| 125 | 1 | 0 | -7.445372 | -2.736151 | -0.446087 |
| 126 | 1 | 0 | -4.481995 | -4.294225 | -2.359400 |
| 127 | 1 | 0 | -6.030554 | -4.713531 | -1.562667 |
| 128 | 1 | 0 | -6.036338 | -3.820242 | -3.104367 |
| 129 | 5 | 0 | -2.704726 | 0.913836  | -0.028004 |
| 130 | 5 | 0 | 2.704719  | -0.913862 | 0.028065  |

2PB-c

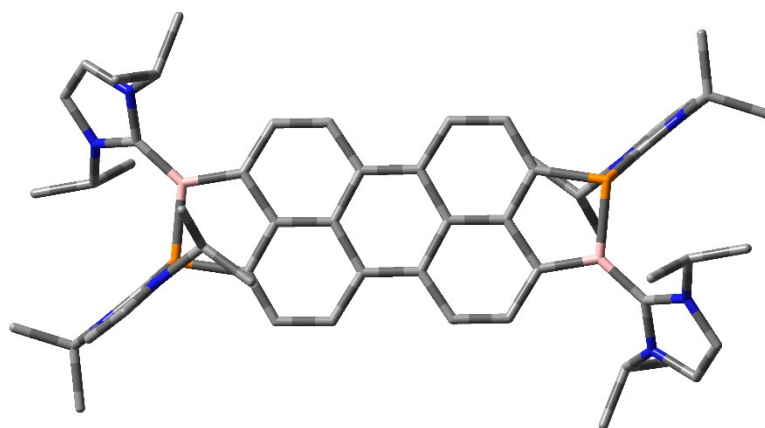

UB3LYP/6-31G\*

Center      Atomic      Atomic      Coordinates (Angstroms)

| Number | Number | Type | X         | Y         | Z         |
|--------|--------|------|-----------|-----------|-----------|
| 1      | 6      | 0    | 1.572962  | -2.358752 | 0.413614  |
| 2      | 6      | 0    | 0.760754  | -1.206417 | 0.236403  |
| 3      | 6      | 0    | 1.411762  | 0.010704  | -0.142008 |
| 4      | 6      | 0    | 2.833910  | 0.023645  | -0.272470 |
| 5      | 6      | 0    | 3.662279  | -1.144424 | -0.012412 |
| 6      | 6      | 0    | 2.947818  | -2.335948 | 0.291186  |
| 7      | 6      | 0    | 0.674473  | 1.219109  | -0.397147 |
| 8      | 6      | 0    | 3.500413  | 1.198180  | -0.691123 |
| 9      | 1      | 0    | 3.490299  | -3.270191 | 0.412166  |
| 10     | 6      | 0    | 2.770729  | 2.355902  | -0.979925 |
| 11     | 6      | 0    | 1.390982  | 2.366682  | -0.816801 |
| 12     | 1      | 0    | 3.273762  | 3.250396  | -1.342267 |
| 13     | 6      | 0    | -2.770750 | -2.355920 | 0.980052  |
| 14     | 6      | 0    | -3.500434 | -1.198195 | 0.691260  |
| 15     | 6      | 0    | -2.833928 | -0.023656 | 0.272621  |
| 16     | 6      | 0    | -1.411779 | -0.010714 | 0.142166  |
| 17     | 6      | 0    | -0.674488 | -1.219121 | 0.397300  |
| 18     | 6      | 0    | -1.391002 | -2.366699 | 0.816939  |
| 19     | 1      | 0    | -3.273787 | -3.250419 | 1.342376  |
| 20     | 6      | 0    | -3.662293 | 1.144411  | 0.012562  |
| 21     | 6      | 0    | -0.760773 | 1.206406  | -0.236247 |
| 22     | 6      | 0    | -1.572978 | 2.358738  | -0.413470 |
| 23     | 6      | 0    | -2.947837 | 2.335929  | -0.291050 |
| 24     | 1      | 0    | -3.490316 | 3.270171  | -0.412044 |
| 25     | 1      | 0    | -1.100255 | 3.307724  | -0.646594 |
| 26     | 1      | 0    | 0.853561  | 3.278453  | -1.053305 |
| 27     | 1      | 0    | -0.853583 | -3.278474 | 1.053432  |
| 28     | 1      | 0    | 1.100236  | -3.307738 | 0.646734  |
| 29     | 15     | 0    | 5.284801  | 0.905650  | -0.931654 |
| 30     | 15     | 0    | -5.284820 | -0.905685 | 0.931759  |
| 31     | 6      | 0    | -7.603066 | 3.714963  | -0.377010 |
| 32     | 6      | 0    | -8.082115 | 3.229982  | 0.790991  |
| 33     | 1      | 0    | -7.953439 | 4.531242  | -0.987912 |
| 34     | 1      | 0    | -8.910914 | 3.563893  | 1.393857  |
| 35     | 6      | 0    | -7.358211 | -3.527506 | -1.356542 |
| 36     | 6      | 0    | -6.475040 | -3.121846 | -2.303933 |
| 37     | 1      | 0    | -8.157892 | -4.248519 | -1.407845 |
| 38     | 1      | 0    | -6.364139 | -3.429446 | -3.331006 |
| 39     | 6      | 0    | 7.358268  | 3.527567  | 1.356479  |
| 40     | 6      | 0    | 6.475237  | 3.121832  | 2.303967  |
| 41     | 1      | 0    | 8.157907  | 4.248631  | 1.407698  |
| 42     | 1      | 0    | 6.364442  | 3.429404  | 3.331060  |

|    |   |   |           |           |           |
|----|---|---|-----------|-----------|-----------|
| 43 | 6 | 0 | 8.081847  | -3.230169 | -0.791420 |
| 44 | 6 | 0 | 7.603028  | -3.715106 | 0.376695  |
| 45 | 1 | 0 | 8.910490  | -3.564136 | -1.394473 |
| 46 | 1 | 0 | 7.953479  | -4.531403 | 0.987527  |
| 47 | 6 | 0 | 6.012994  | 1.983376  | 0.424999  |
| 48 | 6 | 0 | 6.285142  | -1.960825 | -0.219300 |
| 49 | 6 | 0 | -6.012959 | -1.983377 | -0.424934 |
| 50 | 6 | 0 | -6.285215 | 1.960739  | 0.219241  |
| 51 | 7 | 0 | 5.658213  | 2.169935  | 1.726984  |
| 52 | 7 | 0 | 7.065351  | 2.824942  | 0.203117  |
| 53 | 7 | 0 | 6.505612  | -2.942911 | 0.728251  |
| 54 | 7 | 0 | 7.284705  | -2.154893 | -1.156210 |
| 55 | 7 | 0 | -6.505524 | 2.942843  | -0.728335 |
| 56 | 7 | 0 | -7.285001 | 2.154735  | 1.155941  |
| 57 | 7 | 0 | -5.658030 | -2.169986 | -1.726869 |
| 58 | 7 | 0 | -7.065389 | -2.824880 | -0.203157 |
| 59 | 6 | 0 | 4.549687  | 1.491422  | 2.453789  |
| 60 | 6 | 0 | 3.382049  | 2.458432  | 2.668415  |
| 61 | 6 | 0 | 5.066251  | 0.900322  | 3.768942  |
| 62 | 1 | 0 | 4.241343  | 0.676003  | 1.800508  |
| 63 | 1 | 0 | 3.014021  | 2.851721  | 1.718214  |
| 64 | 1 | 0 | 2.558493  | 1.925088  | 3.153369  |
| 65 | 1 | 0 | 3.671344  | 3.294425  | 3.317029  |
| 66 | 1 | 0 | 5.933936  | 0.255586  | 3.603959  |
| 67 | 1 | 0 | 5.338989  | 1.675146  | 4.494627  |
| 68 | 1 | 0 | 4.271982  | 0.297426  | 4.219902  |
| 69 | 6 | 0 | 7.795966  | 3.014924  | -1.076890 |
| 70 | 6 | 0 | 9.266175  | 2.618276  | -0.913687 |
| 71 | 6 | 0 | 7.612031  | 4.447627  | -1.586128 |
| 72 | 1 | 0 | 7.310027  | 2.328335  | -1.773188 |
| 73 | 1 | 0 | 9.359934  | 1.591349  | -0.546041 |
| 74 | 1 | 0 | 9.771273  | 2.684471  | -1.882557 |
| 75 | 1 | 0 | 9.794377  | 3.281611  | -0.219282 |
| 76 | 1 | 0 | 6.550927  | 4.690288  | -1.698740 |
| 77 | 1 | 0 | 8.067677  | 5.183507  | -0.913945 |
| 78 | 1 | 0 | 8.091637  | 4.549811  | -2.564756 |
| 79 | 6 | 0 | 7.309173  | -1.565656 | -2.513148 |
| 80 | 6 | 0 | 6.661500  | -2.524204 | -3.520465 |
| 81 | 6 | 0 | 8.731608  | -1.160419 | -2.909941 |
| 82 | 1 | 0 | 6.698963  | -0.665104 | -2.449114 |
| 83 | 1 | 0 | 5.639577  | -2.767602 | -3.214130 |
| 84 | 1 | 0 | 6.621292  | -2.056297 | -4.509871 |
| 85 | 1 | 0 | 7.231620  | -3.456335 | -3.607915 |
| 86 | 1 | 0 | 9.181294  | -0.500722 | -2.160355 |



|     |   |   |           |           |           |
|-----|---|---|-----------|-----------|-----------|
| 87  | 1 | 0 | 9.389274  | -2.027046 | -3.042859 |
| 88  | 1 | 0 | 8.703230  | -0.626870 | -3.865457 |
| 89  | 6 | 0 | 5.871101  | -3.009559 | 2.060567  |
| 90  | 6 | 0 | 6.856978  | -2.531557 | 3.135845  |
| 91  | 6 | 0 | 5.344025  | -4.418199 | 2.352626  |
| 92  | 1 | 0 | 5.030466  | -2.315928 | 2.008319  |
| 93  | 1 | 0 | 7.245078  | -1.537244 | 2.892585  |
| 94  | 1 | 0 | 6.357023  | -2.481471 | 4.108866  |
| 95  | 1 | 0 | 7.708176  | -3.215149 | 3.231460  |
| 96  | 1 | 0 | 4.665149  | -4.762244 | 1.567583  |
| 97  | 1 | 0 | 6.158968  | -5.145613 | 2.445625  |
| 98  | 1 | 0 | 4.797105  | -4.415385 | 3.300998  |
| 99  | 6 | 0 | -4.549397 | -1.491515 | -2.453550 |
| 100 | 6 | 0 | -5.065799 | -0.900372 | -3.768750 |
| 101 | 6 | 0 | -3.381779 | -2.458574 | -2.668071 |
| 102 | 1 | 0 | -4.241085 | -0.676121 | -1.800221 |
| 103 | 1 | 0 | -5.933500 | -0.255631 | -3.603857 |
| 104 | 1 | 0 | -4.271473 | -0.297468 | -4.219599 |
| 105 | 1 | 0 | -5.338454 | -1.675175 | -4.494487 |
| 106 | 1 | 0 | -3.013840 | -2.851867 | -1.717838 |
| 107 | 1 | 0 | -3.671062 | -3.294564 | -3.316696 |
| 108 | 1 | 0 | -2.558168 | -1.925271 | -3.152976 |
| 109 | 6 | 0 | -7.796200 | -3.014756 | 1.076753  |
| 110 | 6 | 0 | -7.612682 | -4.447529 | 1.585942  |
| 111 | 6 | 0 | -9.266292 | -2.617738 | 0.913391  |
| 112 | 1 | 0 | -7.310175 | -2.328321 | 1.773144  |
| 113 | 1 | 0 | -6.551652 | -4.690483 | 1.698619  |
| 114 | 1 | 0 | -8.092383 | -4.549618 | 2.564533  |
| 115 | 1 | 0 | -8.068485 | -5.183264 | 0.913706  |
| 116 | 1 | 0 | -9.359753 | -1.590753 | 0.545833  |
| 117 | 1 | 0 | -9.794551 | -3.280879 | 0.218842  |
| 118 | 1 | 0 | -9.771543 | -2.683908 | 1.882184  |
| 119 | 6 | 0 | -7.309629 | 1.565581  | 2.512915  |
| 120 | 6 | 0 | -8.732194 | 1.160910  | 2.909817  |
| 121 | 6 | 0 | -6.661539 | 2.523941  | 3.520145  |
| 122 | 1 | 0 | -6.699776 | 0.664785  | 2.448919  |
| 123 | 1 | 0 | -9.182227 | 0.501426  | 2.160251  |
| 124 | 1 | 0 | -8.703930 | 0.627306  | 3.865305  |
| 125 | 1 | 0 | -9.389497 | 2.027793  | 3.042858  |
| 126 | 1 | 0 | -5.639532 | 2.766911  | 3.213752  |
| 127 | 1 | 0 | -7.231295 | 3.456301  | 3.607532  |
| 128 | 1 | 0 | -6.621481 | 2.056094  | 4.509585  |
| 129 | 6 | 0 | -5.870733 | 3.009543  | -2.060513 |
| 130 | 6 | 0 | -5.343678 | 4.418219  | -2.352447 |

|     |   |   |           |           |           |
|-----|---|---|-----------|-----------|-----------|
| 131 | 6 | 0 | -6.856336 | 2.531484  | -3.136017 |
| 132 | 1 | 0 | -5.030065 | 2.315966  | -2.008092 |
| 133 | 1 | 0 | -4.664994 | 4.762299  | -1.567254 |
| 134 | 1 | 0 | -4.796554 | 4.415448  | -3.300702 |
| 135 | 1 | 0 | -6.158646 | 5.145584  | -2.445613 |
| 136 | 1 | 0 | -7.244429 | 1.537144  | -2.892849 |
| 137 | 1 | 0 | -7.707555 | 3.215023  | -3.231827 |
| 138 | 1 | 0 | -6.356154 | 2.481429  | -4.108924 |
| 139 | 5 | 0 | 5.146555  | -0.917446 | -0.230777 |
| 140 | 5 | 0 | -5.146578 | 0.917438  | 0.230912  |

-----

**UWB97XD/6-31G\***

| Center<br>Number | Atomic<br>Number | Atomic<br>Type | Coordinates (Angstroms) |           |           |
|------------------|------------------|----------------|-------------------------|-----------|-----------|
|                  |                  |                | X                       | Y         | Z         |
| 1                | 6                | 0              | 1.656474                | -2.219252 | 0.717126  |
| 2                | 6                | 0              | 0.804391                | -1.135159 | 0.384442  |
| 3                | 6                | 0              | 1.393564                | 0.016308  | -0.216744 |
| 4                | 6                | 0              | 2.801237                | 0.040933  | -0.417964 |
| 5                | 6                | 0              | 3.670547                | -1.038892 | 0.001784  |
| 6                | 6                | 0              | 3.019908                | -2.179408 | 0.533848  |
| 7                | 6                | 0              | 0.617681                | 1.153668  | -0.614770 |
| 8                | 6                | 0              | 3.417701                | 1.160431  | -1.012541 |
| 9                | 1                | 0              | 3.606435                | -3.058573 | 0.791739  |
| 10               | 6                | 0              | 2.648737                | 2.241910  | -1.438575 |
| 11               | 6                | 0              | 1.279788                | 2.239058  | -1.230691 |
| 12               | 1                | 0              | 3.116777                | 3.090179  | -1.932759 |
| 13               | 6                | 0              | -2.648857               | -2.242435 | 1.438039  |
| 14               | 6                | 0              | -3.417777               | -1.160816 | 1.012272  |
| 15               | 6                | 0              | -2.801254               | -0.041189 | 0.418001  |
| 16               | 6                | 0              | -1.393577               | -0.016575 | 0.216805  |
| 17               | 6                | 0              | -0.617709               | -1.153992 | 0.614713  |
| 18               | 6                | 0              | -1.279893               | -2.239553 | 1.230256  |
| 19               | 1                | 0              | -3.116952               | -3.090861 | 1.931903  |
| 20               | 6                | 0              | -3.670500               | 1.038809  | -0.001421 |
| 21               | 6                | 0              | -0.804381               | 1.134960  | -0.384225 |
| 22               | 6                | 0              | -1.656380               | 2.219240  | -0.716494 |
| 23               | 6                | 0              | -3.019809               | 2.179455  | -0.533125 |
| 24               | 1                | 0              | -3.606278               | 3.058767  | -0.790643 |
| 25               | 1                | 0              | -1.226630               | 3.125577  | -1.130122 |
| 26               | 1                | 0              | 0.709053                | 3.095156  | -1.571763 |
| 27               | 1                | 0              | -0.709229               | -3.095814 | 1.571032  |

|    |    |   |           |           |           |
|----|----|---|-----------|-----------|-----------|
| 28 | 1  | 0 | 1.226797  | -3.125457 | 1.131119  |
| 29 | 15 | 0 | 5.206094  | 0.930043  | -1.200792 |
| 30 | 15 | 0 | -5.206159 | -0.930438 | 1.200555  |
| 31 | 6  | 0 | -7.685911 | 3.292345  | -0.818520 |
| 32 | 6  | 0 | -8.154582 | 3.011668  | 0.415067  |
| 33 | 1  | 0 | -8.062374 | 3.967857  | -1.569506 |
| 34 | 1  | 0 | -9.003999 | 3.413620  | 0.941166  |
| 35 | 6  | 0 | -7.389382 | -3.306484 | -1.196590 |
| 36 | 6  | 0 | -6.329122 | -3.154266 | -2.021955 |
| 37 | 1  | 0 | -8.304306 | -3.860110 | -1.326351 |
| 38 | 1  | 0 | -6.143428 | -3.559315 | -3.003149 |
| 39 | 6  | 0 | 7.389445  | 3.306742  | 1.195579  |
| 40 | 6  | 0 | 6.329142  | 3.154907  | 2.020959  |
| 41 | 1  | 0 | 8.304437  | 3.860291  | 1.325198  |
| 42 | 1  | 0 | 6.143454  | 3.560298  | 3.002012  |
| 43 | 6  | 0 | 8.154556  | -3.011856 | -0.414200 |
| 44 | 6  | 0 | 7.685952  | -3.292107 | 0.819511  |
| 45 | 1  | 0 | 9.003918  | -3.414024 | -0.940221 |
| 46 | 1  | 0 | 8.062433  | -3.967388 | 1.570696  |
| 47 | 6  | 0 | 5.897955  | 1.994757  | 0.163332  |
| 48 | 6  | 0 | 6.316353  | -1.745153 | -0.085412 |
| 49 | 6  | 0 | -5.897996 | -1.994683 | -0.163961 |
| 50 | 6  | 0 | -6.316319 | 1.745121  | 0.085966  |
| 51 | 7  | 0 | 5.423446  | 2.337353  | 1.382996  |
| 52 | 7  | 0 | 7.107220  | 2.597030  | 0.048601  |
| 53 | 7  | 0 | 6.559048  | -2.516838 | 1.017754  |
| 54 | 7  | 0 | 7.321941  | -2.054260 | -0.965185 |
| 55 | 7  | 0 | -6.558990 | 2.517151  | -1.016968 |
| 56 | 7  | 0 | -7.321970 | 2.053916  | 0.965787  |
| 57 | 7  | 0 | -5.423504 | -2.336800 | -1.383768 |
| 58 | 7  | 0 | -7.107162 | -2.597179 | -0.049359 |
| 59 | 6  | 0 | 4.147008  | 1.907524  | 1.997585  |
| 60 | 6  | 0 | 3.140540  | 3.051720  | 1.985122  |
| 61 | 6  | 0 | 4.394440  | 1.347978  | 3.394074  |
| 62 | 1  | 0 | 3.784883  | 1.098218  | 1.372309  |
| 63 | 1  | 0 | 2.980613  | 3.416489  | 0.968298  |
| 64 | 1  | 0 | 2.180492  | 2.689012  | 2.362640  |
| 65 | 1  | 0 | 3.471205  | 3.881134  | 2.621475  |
| 66 | 1  | 0 | 5.165663  | 0.574304  | 3.372474  |
| 67 | 1  | 0 | 4.688423  | 2.121553  | 4.112252  |
| 68 | 1  | 0 | 3.466472  | 0.896746  | 3.755713  |
| 69 | 6  | 0 | 8.046722  | 2.424029  | -1.075842 |
| 70 | 6  | 0 | 9.024883  | 1.296533  | -0.752903 |
| 71 | 6  | 0 | 8.743239  | 3.737811  | -1.413280 |

|     |   |   |           |           |           |
|-----|---|---|-----------|-----------|-----------|
| 72  | 1 | 0 | 7.421327  | 2.127764  | -1.921353 |
| 73  | 1 | 0 | 8.490888  | 0.367221  | -0.529069 |
| 74  | 1 | 0 | 9.684573  | 1.122380  | -1.608413 |
| 75  | 1 | 0 | 9.647640  | 1.553646  | 0.111075  |
| 76  | 1 | 0 | 8.018895  | 4.543174  | -1.563266 |
| 77  | 1 | 0 | 9.454929  | 4.040528  | -0.637790 |
| 78  | 1 | 0 | 9.309151  | 3.610250  | -2.340043 |
| 79  | 6 | 0 | 7.328969  | -1.650061 | -2.382513 |
| 80  | 6 | 0 | 6.285226  | -2.449883 | -3.160074 |
| 81  | 6 | 0 | 8.723696  | -1.777354 | -2.985187 |
| 82  | 1 | 0 | 7.044869  | -0.595274 | -2.394500 |
| 83  | 1 | 0 | 5.292697  | -2.315545 | -2.720205 |
| 84  | 1 | 0 | 6.253266  | -2.110260 | -4.199689 |
| 85  | 1 | 0 | 6.535300  | -3.516535 | -3.150351 |
| 86  | 1 | 0 | 9.479463  | -1.280323 | -2.368771 |
| 87  | 1 | 0 | 9.015827  | -2.823568 | -3.125713 |
| 88  | 1 | 0 | 8.724720  | -1.306852 | -3.972117 |
| 89  | 6 | 0 | 5.935993  | -2.314181 | 2.333096  |
| 90  | 6 | 0 | 6.888527  | -1.517813 | 3.225377  |
| 91  | 6 | 0 | 5.524092  | -3.643561 | 2.956626  |
| 92  | 1 | 0 | 5.041732  | -1.718842 | 2.140267  |
| 93  | 1 | 0 | 7.156719  | -0.569704 | 2.746946  |
| 94  | 1 | 0 | 6.413895  | -1.303108 | 4.187923  |
| 95  | 1 | 0 | 7.809601  | -2.077470 | 3.421745  |
| 96  | 1 | 0 | 4.888393  | -4.217890 | 2.277687  |
| 97  | 1 | 0 | 6.393243  | -4.256601 | 3.220370  |
| 98  | 1 | 0 | 4.962375  | -3.455671 | 3.875978  |
| 99  | 6 | 0 | -4.147158 | -1.906569 | -1.998276 |
| 100 | 6 | 0 | -4.394702 | -1.346880 | -3.394691 |
| 101 | 6 | 0 | -3.140400 | -3.050510 | -1.986015 |
| 102 | 1 | 0 | -3.785258 | -1.097252 | -1.372873 |
| 103 | 1 | 0 | -5.166154 | -0.573437 | -3.373031 |
| 104 | 1 | 0 | -3.466847 | -0.895324 | -3.756216 |
| 105 | 1 | 0 | -4.688410 | -2.120439 | -4.112999 |
| 106 | 1 | 0 | -2.980344 | -3.415407 | -0.969259 |
| 107 | 1 | 0 | -3.470879 | -3.879897 | -2.622499 |
| 108 | 1 | 0 | -2.180455 | -2.687498 | -2.363504 |
| 109 | 6 | 0 | -8.046632 | -2.424667 | 1.075189  |
| 110 | 6 | 0 | -8.743060 | -3.738620 | 1.412149  |
| 111 | 6 | 0 | -9.024879 | -1.297112 | 0.752725  |
| 112 | 1 | 0 | -7.421226 | -2.128692 | 1.920793  |
| 113 | 1 | 0 | -8.018668 | -4.544004 | 1.561787  |
| 114 | 1 | 0 | -9.308935 | -3.611453 | 2.338989  |
| 115 | 1 | 0 | -9.454773 | -4.041068 | 0.636573  |

|     |   |   |           |           |           |
|-----|---|---|-----------|-----------|-----------|
| 116 | 1 | 0 | -8.490966 | -0.367665 | 0.529263  |
| 117 | 1 | 0 | -9.647633 | -1.553923 | -0.111344 |
| 118 | 1 | 0 | -9.684567 | -1.123362 | 1.608320  |
| 119 | 6 | 0 | -7.329019 | 1.649345  | 2.383009  |
| 120 | 6 | 0 | -8.723790 | 1.776343  | 2.985643  |
| 121 | 6 | 0 | -6.285387 | 2.449067  | 3.160823  |
| 122 | 1 | 0 | -7.044821 | 0.594583  | 2.394732  |
| 123 | 1 | 0 | -9.479475 | 1.279411  | 2.369046  |
| 124 | 1 | 0 | -8.724823 | 1.305564  | 3.972442  |
| 125 | 1 | 0 | -9.016029 | 2.822489  | 3.126447  |
| 126 | 1 | 0 | -5.292824 | 2.314926  | 2.720970  |
| 127 | 1 | 0 | -6.535558 | 3.515699  | 3.151353  |
| 128 | 1 | 0 | -6.253450 | 2.109189  | 4.200355  |
| 129 | 6 | 0 | -5.935892 | 2.314925  | -2.332352 |
| 130 | 6 | 0 | -5.523912 | 3.644506  | -2.955401 |
| 131 | 6 | 0 | -6.888425 | 1.518911  | -3.224949 |
| 132 | 1 | 0 | -5.041665 | 1.719479  | -2.139697 |
| 133 | 1 | 0 | -4.888204 | 4.218564  | -2.276241 |
| 134 | 1 | 0 | -4.962180 | 3.456917  | -3.874806 |
| 135 | 1 | 0 | -6.393028 | 4.257681  | -3.218948 |
| 136 | 1 | 0 | -7.156693 | 0.570654  | -2.746852 |
| 137 | 1 | 0 | -7.809460 | 2.078683  | -3.421174 |
| 138 | 1 | 0 | -6.413754 | 1.304511  | -4.187544 |
| 139 | 5 | 0 | 5.131633  | -0.784988 | -0.290649 |
| 140 | 5 | 0 | -5.131607 | 0.784902  | 0.290958  |

-----

**UM06-2X/6-31G\***

| Center<br>Number | Atomic<br>Number | Atomic<br>Type | Coordinates (Angstroms) |           |           |
|------------------|------------------|----------------|-------------------------|-----------|-----------|
|                  |                  |                | X                       | Y         | Z         |
| 1                | 6                | 0              | 1.562362                | -2.383503 | 0.252638  |
| 2                | 6                | 0              | 0.756410                | -1.219181 | 0.156625  |
| 3                | 6                | 0              | 1.400042                | 0.009178  | -0.177285 |
| 4                | 6                | 0              | 2.813955                | 0.021395  | -0.340715 |
| 5                | 6                | 0              | 3.641026                | -1.153982 | -0.139517 |
| 6                | 6                | 0              | 2.931197                | -2.359067 | 0.109111  |
| 7                | 6                | 0              | 0.670899                | 1.231200  | -0.354184 |
| 8                | 6                | 0              | 3.477580                | 1.205547  | -0.709680 |
| 9                | 1                | 0              | 3.478271                | -3.297537 | 0.168415  |
| 10               | 6                | 0              | 2.755591                | 2.378725  | -0.928825 |
| 11               | 6                | 0              | 1.382346                | 2.390745  | -0.736767 |
| 12               | 1                | 0              | 3.260909                | 3.287147  | -1.250653 |

|    |    |   |           |           |           |
|----|----|---|-----------|-----------|-----------|
| 13 | 6  | 0 | -2.755401 | -2.378571 | 0.929210  |
| 14 | 6  | 0 | -3.477433 | -1.205461 | 0.709849  |
| 15 | 6  | 0 | -2.813833 | -0.021329 | 0.340757  |
| 16 | 6  | 0 | -1.399921 | -0.009099 | 0.177332  |
| 17 | 6  | 0 | -0.670751 | -1.231102 | 0.354312  |
| 18 | 6  | 0 | -1.382161 | -2.390599 | 0.737132  |
| 19 | 1  | 0 | -3.260691 | -3.286938 | 1.251238  |
| 20 | 6  | 0 | -3.640911 | 1.154021  | 0.139473  |
| 21 | 6  | 0 | -0.756299 | 1.219257  | -0.156637 |
| 22 | 6  | 0 | -1.562270 | 2.383534  | -0.252840 |
| 23 | 6  | 0 | -2.931118 | 2.359067  | -0.109324 |
| 24 | 1  | 0 | -3.478210 | 3.297514  | -0.168790 |
| 25 | 1  | 0 | -1.086824 | 3.340986  | -0.438810 |
| 26 | 1  | 0 | 0.845385  | 3.314859  | -0.917302 |
| 27 | 1  | 0 | -0.845155 | -3.314643 | 0.917892  |
| 28 | 1  | 0 | 1.086865  | -3.340967 | 0.438426  |
| 29 | 15 | 0 | 5.266308  | 0.936439  | -0.931984 |
| 30 | 15 | 0 | -5.266159 | -0.936411 | 0.932119  |
| 31 | 6  | 0 | -7.423534 | 3.813238  | -0.231801 |
| 32 | 6  | 0 | -7.997069 | 3.266444  | 0.862499  |
| 33 | 1  | 0 | -7.694974 | 4.689605  | -0.798532 |
| 34 | 1  | 0 | -8.851027 | 3.588925  | 1.434348  |
| 35 | 6  | 0 | -6.963067 | -3.559824 | -1.618479 |
| 36 | 6  | 0 | -6.087625 | -2.994851 | -2.486405 |
| 37 | 1  | 0 | -7.673956 | -4.357392 | -1.759217 |
| 38 | 1  | 0 | -5.892467 | -3.209423 | -3.525029 |
| 39 | 6  | 0 | 6.962859  | 3.560186  | 1.618490  |
| 40 | 6  | 0 | 6.087452  | 2.995158  | 2.486416  |
| 41 | 1  | 0 | 7.673615  | 4.357878  | 1.759195  |
| 42 | 1  | 0 | 5.892204  | 3.209790  | 3.525010  |
| 43 | 6  | 0 | 7.996673  | -3.266976 | -0.862759 |
| 44 | 6  | 0 | 7.422984  | -3.813767 | 0.231457  |
| 45 | 1  | 0 | 8.850564  | -3.589579 | -1.434638 |
| 46 | 1  | 0 | 7.694223  | -4.690253 | 0.798099  |
| 47 | 6  | 0 | 5.851547  | 1.954615  | 0.525831  |
| 48 | 6  | 0 | 6.235812  | -1.969145 | -0.303900 |
| 49 | 6  | 0 | -5.851475 | -1.954488 | -0.525753 |
| 50 | 6  | 0 | -6.235890 | 1.968985  | 0.303782  |
| 51 | 7  | 0 | 5.417760  | 2.006814  | 1.804490  |
| 52 | 7  | 0 | 6.811931  | 2.904151  | 0.417297  |
| 53 | 7  | 0 | 6.344941  | -3.018313 | 0.569263  |
| 54 | 7  | 0 | 7.273975  | -2.132397 | -1.181415 |
| 55 | 7  | 0 | -6.345345 | 3.017970  | -0.569548 |
| 56 | 7  | 0 | -7.274062 | 2.132122  | 1.181316  |

|     |   |   |           |           |           |
|-----|---|---|-----------|-----------|-----------|
| 57  | 7 | 0 | -5.417773 | -2.006640 | -1.804443 |
| 58  | 7 | 0 | -6.811970 | -2.903918 | -0.417236 |
| 59  | 6 | 0 | 4.379488  | 1.145557  | 2.416970  |
| 60  | 6 | 0 | 3.085126  | 1.924968  | 2.613750  |
| 61  | 6 | 0 | 4.906319  | 0.558052  | 3.722231  |
| 62  | 1 | 0 | 4.228426  | 0.335850  | 1.702904  |
| 63  | 1 | 0 | 2.729568  | 2.349921  | 1.672728  |
| 64  | 1 | 0 | 2.315139  | 1.246575  | 2.991683  |
| 65  | 1 | 0 | 3.222418  | 2.729343  | 3.346111  |
| 66  | 1 | 0 | 5.881771  | 0.086458  | 3.579568  |
| 67  | 1 | 0 | 4.992416  | 1.315761  | 4.508324  |
| 68  | 1 | 0 | 4.202174  | -0.200689 | 4.074649  |
| 69  | 6 | 0 | 7.519412  | 3.274495  | -0.829359 |
| 70  | 6 | 0 | 8.959189  | 3.674376  | -0.530211 |
| 71  | 6 | 0 | 6.740647  | 4.370086  | -1.548462 |
| 72  | 1 | 0 | 7.514619  | 2.370310  | -1.440979 |
| 73  | 1 | 0 | 9.469435  | 2.916811  | 0.070610  |
| 74  | 1 | 0 | 9.496955  | 3.785083  | -1.474911 |
| 75  | 1 | 0 | 9.015523  | 4.636526  | -0.011570 |
| 76  | 1 | 0 | 5.735558  | 4.022025  | -1.802736 |
| 77  | 1 | 0 | 6.658980  | 5.261319  | -0.917693 |
| 78  | 1 | 0 | 7.255548  | 4.646886  | -2.472392 |
| 79  | 6 | 0 | 7.446722  | -1.345844 | -2.415457 |
| 80  | 6 | 0 | 6.403536  | -1.761015 | -3.449341 |
| 81  | 6 | 0 | 8.867352  | -1.475586 | -2.951099 |
| 82  | 1 | 0 | 7.276468  | -0.303629 | -2.134215 |
| 83  | 1 | 0 | 5.393614  | -1.650340 | -3.044841 |
| 84  | 1 | 0 | 6.493690  | -1.136111 | -4.342263 |
| 85  | 1 | 0 | 6.556846  | -2.806295 | -3.738030 |
| 86  | 1 | 0 | 9.612938  | -1.257178 | -2.180873 |
| 87  | 1 | 0 | 9.056963  | -2.474509 | -3.356627 |
| 88  | 1 | 0 | 9.000241  | -0.763853 | -3.769483 |
| 89  | 6 | 0 | 5.668879  | -3.101979 | 1.873977  |
| 90  | 6 | 0 | 6.636225  | -2.641830 | 2.963531  |
| 91  | 6 | 0 | 5.146661  | -4.510966 | 2.130560  |
| 92  | 1 | 0 | 4.830117  | -2.405990 | 1.811251  |
| 93  | 1 | 0 | 7.041928  | -1.656219 | 2.716684  |
| 94  | 1 | 0 | 6.122142  | -2.581131 | 3.927192  |
| 95  | 1 | 0 | 7.471862  | -3.342316 | 3.065527  |
| 96  | 1 | 0 | 4.509407  | -4.856657 | 1.313406  |
| 97  | 1 | 0 | 5.967634  | -5.224942 | 2.256420  |
| 98  | 1 | 0 | 4.560424  | -4.518334 | 3.053192  |
| 99  | 6 | 0 | -4.379370 | -1.145519 | -2.416887 |
| 100 | 6 | 0 | -4.906002 | -0.558054 | -3.722248 |

|     |   |   |           |           |           |
|-----|---|---|-----------|-----------|-----------|
| 101 | 6 | 0 | -3.085056 | -1.925054 | -2.613493 |
| 102 | 1 | 0 | -4.228308 | -0.335777 | -1.702863 |
| 103 | 1 | 0 | -5.881463 | -0.086427 | -3.579754 |
| 104 | 1 | 0 | -4.201783 | 0.200654  | -4.074591 |
| 105 | 1 | 0 | -4.991998 | -1.315786 | -4.508329 |
| 106 | 1 | 0 | -2.729597 | -2.349950 | -1.672409 |
| 107 | 1 | 0 | -3.222371 | -2.729484 | -3.345790 |
| 108 | 1 | 0 | -2.314983 | -1.246761 | -2.991433 |
| 109 | 6 | 0 | -7.519381 | -3.274315 | 0.829444  |
| 110 | 6 | 0 | -6.740583 | -4.369947 | 1.548450  |
| 111 | 6 | 0 | -8.959178 | -3.674173 | 0.530366  |
| 112 | 1 | 0 | -7.514552 | -2.370162 | 1.441111  |
| 113 | 1 | 0 | -5.735474 | -4.021908 | 1.802673  |
| 114 | 1 | 0 | -7.255427 | -4.646783 | 2.472400  |
| 115 | 1 | 0 | -6.658964 | -5.261151 | 0.917633  |
| 116 | 1 | 0 | -9.469453 | -2.916587 | -0.070405 |
| 117 | 1 | 0 | -9.015554 | -4.636309 | 0.011704  |
| 118 | 1 | 0 | -9.496891 | -3.784899 | 1.475093  |
| 119 | 6 | 0 | -7.446659 | 1.345637  | 2.415414  |
| 120 | 6 | 0 | -8.867359 | 1.474983  | 2.950973  |
| 121 | 6 | 0 | -6.403607 | 1.761161  | 3.449291  |
| 122 | 1 | 0 | -7.276070 | 0.303456  | 2.134276  |
| 123 | 1 | 0 | -9.612825 | 1.256353  | 2.180693  |
| 124 | 1 | 0 | -9.000093 | 0.763237  | 3.769371  |
| 125 | 1 | 0 | -9.057295 | 2.473856  | 3.356471  |
| 126 | 1 | 0 | -5.393659 | 1.650686  | 3.044788  |
| 127 | 1 | 0 | -6.557158 | 2.806423  | 3.737914  |
| 128 | 1 | 0 | -6.493593 | 1.136296  | 4.342256  |
| 129 | 6 | 0 | -5.669074 | 3.101898  | -1.874126 |
| 130 | 6 | 0 | -5.146861 | 4.510955  | -2.130352 |
| 131 | 6 | 0 | -6.636213 | 2.641964  | -2.963956 |
| 132 | 1 | 0 | -4.830321 | 2.405889  | -1.811389 |
| 133 | 1 | 0 | -4.509772 | 4.856538  | -1.313028 |
| 134 | 1 | 0 | -4.560478 | 4.518537  | -3.052889 |
| 135 | 1 | 0 | -5.967866 | 5.224899  | -2.256196 |
| 136 | 1 | 0 | -7.042009 | 1.656324  | -2.717387 |
| 137 | 1 | 0 | -7.471809 | 3.342489  | -3.066028 |
| 138 | 1 | 0 | -6.121923 | 2.581424  | -3.927517 |
| 139 | 5 | 0 | 5.120095  | -0.900084 | -0.308756 |
| 140 | 5 | 0 | -5.119979 | 0.900108  | 0.308799  |

-----  
**BP86/6-31G(d)**  
-----



| Center<br>Number | Atomic<br>Number | Atomic<br>Type | Coordinates (Angstroms) |           |           |
|------------------|------------------|----------------|-------------------------|-----------|-----------|
|                  |                  |                | X                       | Y         | Z         |
| 1                | 6                | 0              | -1.575152               | -2.382827 | -0.352567 |
| 2                | 6                | 0              | -0.762087               | -1.219529 | -0.207183 |
| 3                | 6                | 0              | -1.418843               | 0.013369  | 0.138398  |
| 4                | 6                | 0              | -2.847949               | 0.027334  | 0.263123  |
| 5                | 6                | 0              | -3.677809               | -1.151229 | 0.029579  |
| 6                | 6                | 0              | -2.960289               | -2.356831 | -0.235734 |
| 7                | 6                | 0              | -0.679718               | 1.234448  | 0.365585  |
| 8                | 6                | 0              | -3.519855               | 1.217670  | 0.657091  |
| 9                | 1                | 0              | -3.507590               | -3.302359 | -0.330392 |
| 10               | 6                | 0              | -2.789779               | 2.390502  | 0.920075  |
| 11               | 6                | 0              | -1.401190               | 2.397625  | 0.756710  |
| 12               | 1                | 0              | -3.298952               | 3.299607  | 1.263780  |
| 13               | 6                | 0              | 2.789760                | -2.390506 | -0.919929 |
| 14               | 6                | 0              | 3.519834                | -1.217664 | -0.656987 |
| 15               | 6                | 0              | 2.847927                | -0.027325 | -0.263027 |
| 16               | 6                | 0              | 1.418822                | -0.013366 | -0.138287 |
| 17               | 6                | 0              | 0.679698                | -1.234451 | -0.365456 |
| 18               | 6                | 0              | 1.401173                | -2.397635 | -0.756550 |
| 19               | 1                | 0              | 3.298934                | -3.299621 | -1.263609 |
| 20               | 6                | 0              | 3.677782                | 1.151246  | -0.029521 |
| 21               | 6                | 0              | 0.762065                | 1.219530  | 0.207292  |
| 22               | 6                | 0              | 1.575123                | 2.382836  | 0.352644  |
| 23               | 6                | 0              | 2.960257                | 2.356848  | 0.235781  |
| 24               | 1                | 0              | 3.507552                | 3.302381  | 0.330408  |
| 25               | 1                | 0              | 1.095336                | 3.346166  | 0.556186  |
| 26               | 1                | 0              | -0.858609               | 3.322518  | 0.974699  |
| 27               | 1                | 0              | 0.858597                | -3.322539 | -0.974506 |
| 28               | 1                | 0              | -1.095369               | -3.346158 | -0.556113 |
| 29               | 15               | 0              | -5.309916               | 0.921262  | 0.907398  |
| 30               | 15               | 0              | 5.309876                | -0.921243 | -0.907376 |
| 31               | 6                | 0              | 7.626930                | 3.753941  | 0.287581  |
| 32               | 6                | 0              | 8.133529                | 3.208613  | -0.855882 |
| 33               | 1                | 0              | 7.967019                | 4.606061  | 0.870402  |
| 34               | 1                | 0              | 8.980999                | 3.515780  | -1.462154 |
| 35               | 6                | 0              | 7.377983                | -3.518614 | 1.428951  |
| 36               | 6                | 0              | 6.514884                | -3.057724 | 2.386157  |
| 37               | 1                | 0              | 8.172409                | -4.257713 | 1.490638  |
| 38               | 1                | 0              | 6.418003                | -3.327224 | 3.434484  |
| 39               | 6                | 0              | -7.377851               | 3.518715  | -1.428998 |
| 40               | 6                | 0              | -6.514710               | 3.057826  | -2.386167 |
| 41               | 1                | 0              | -8.172255               | 4.257834  | -1.490715 |

|    |   |   |           |           |           |
|----|---|---|-----------|-----------|-----------|
| 42 | 1 | 0 | -6.417749 | 3.327362  | -3.434478 |
| 43 | 6 | 0 | -8.133512 | -3.208695 | 0.855810  |
| 44 | 6 | 0 | -7.626960 | -3.753882 | -0.287740 |
| 45 | 1 | 0 | -8.980945 | -3.515947 | 1.462092  |
| 46 | 1 | 0 | -7.967068 | -4.605933 | -0.870651 |
| 47 | 6 | 0 | -6.032506 | 1.972400  | -0.461950 |
| 48 | 6 | 0 | -6.319518 | -1.954052 | 0.248945  |
| 49 | 6 | 0 | 6.032550  | -1.972354 | 0.461943  |
| 50 | 6 | 0 | 6.319488  | 1.954068  | -0.248958 |
| 51 | 7 | 0 | -5.700372 | 2.108712  | -1.788624 |
| 52 | 7 | 0 | -7.072510 | 2.851369  | -0.251719 |
| 53 | 7 | 0 | -6.521586 | -2.993226 | -0.656858 |
| 54 | 7 | 0 | -7.346826 | -2.106889 | 1.179928  |
| 55 | 7 | 0 | 6.521532  | 2.993340  | 0.656741  |
| 56 | 7 | 0 | 7.346852  | 2.106772  | -1.179899 |
| 57 | 7 | 0 | 5.700526  | -2.108605 | 1.788650  |
| 58 | 7 | 0 | 7.072561  | -2.851304 | 0.251671  |
| 59 | 6 | 0 | -4.608195 | 1.382243  | -2.499892 |
| 60 | 6 | 0 | -3.400061 | 2.306560  | -2.709768 |
| 61 | 6 | 0 | -5.133972 | 0.799225  | -3.819954 |
| 62 | 1 | 0 | -4.339833 | 0.553114  | -1.824309 |
| 63 | 1 | 0 | -3.025347 | 2.698482  | -1.751012 |
| 64 | 1 | 0 | -2.584574 | 1.734605  | -3.183775 |
| 65 | 1 | 0 | -3.655258 | 3.152218  | -3.375078 |
| 66 | 1 | 0 | -6.036342 | 0.185819  | -3.661762 |
| 67 | 1 | 0 | -5.365363 | 1.584157  | -4.562557 |
| 68 | 1 | 0 | -4.352312 | 0.156569  | -4.258793 |
| 69 | 6 | 0 | -7.771805 | 3.094149  | 1.040808  |
| 70 | 6 | 0 | -9.247681 | 2.682908  | 0.932670  |
| 71 | 6 | 0 | -7.580413 | 4.551927  | 1.485063  |
| 72 | 1 | 0 | -7.253309 | 2.428878  | 1.753523  |
| 73 | 1 | 0 | -9.346041 | 1.630960  | 0.615039  |
| 74 | 1 | 0 | -9.734040 | 2.795675  | 1.916563  |
| 75 | 1 | 0 | -9.798945 | 3.315766  | 0.214039  |
| 76 | 1 | 0 | -6.509958 | 4.807977  | 1.555187  |
| 77 | 1 | 0 | -8.066598 | 5.262426  | 0.792708  |
| 78 | 1 | 0 | -8.034218 | 4.693307  | 2.480725  |
| 79 | 6 | 0 | -7.381609 | -1.441637 | 2.507946  |
| 80 | 6 | 0 | -6.492682 | -2.205270 | 3.504257  |
| 81 | 6 | 0 | -8.823510 | -1.273712 | 3.006468  |
| 82 | 1 | 0 | -6.947867 | -0.441137 | 2.344858  |
| 83 | 1 | 0 | -5.460880 | -2.277785 | 3.121085  |
| 84 | 1 | 0 | -6.467193 | -1.675482 | 4.472398  |
| 85 | 1 | 0 | -6.880305 | -3.225437 | 3.677898  |

|     |   |   |           |           |           |
|-----|---|---|-----------|-----------|-----------|
| 86  | 1 | 0 | -9.462117 | -0.783548 | 2.251137  |
| 87  | 1 | 0 | -9.286533 | -2.237516 | 3.284554  |
| 88  | 1 | 0 | -8.818923 | -0.646468 | 3.913948  |
| 89  | 6 | 0 | -5.864881 | -3.112032 | -1.980104 |
| 90  | 6 | 0 | -6.837899 | -2.671829 | -3.089025 |
| 91  | 6 | 0 | -5.336324 | -4.536199 | -2.209474 |
| 92  | 1 | 0 | -5.016477 | -2.409478 | -1.935897 |
| 93  | 1 | 0 | -7.229169 | -1.660017 | -2.886933 |
| 94  | 1 | 0 | -6.321651 | -2.660713 | -4.064517 |
| 95  | 1 | 0 | -7.696448 | -3.362510 | -3.168943 |
| 96  | 1 | 0 | -4.667263 | -4.856052 | -1.393718 |
| 97  | 1 | 0 | -6.158988 | -5.269887 | -2.290317 |
| 98  | 1 | 0 | -4.768814 | -4.571751 | -3.155066 |
| 99  | 6 | 0 | 4.608421  | -1.382080 | 2.499971  |
| 100 | 6 | 0 | 5.134268  | -0.799142 | 3.820040  |
| 101 | 6 | 0 | 3.400225  | -2.306318 | 2.709836  |
| 102 | 1 | 0 | 4.340101  | -0.552912 | 1.824414  |
| 103 | 1 | 0 | 6.036720  | -0.185852 | 3.661859  |
| 104 | 1 | 0 | 4.352692  | -0.156390 | 4.258887  |
| 105 | 1 | 0 | 5.365554  | -1.584112 | 4.562636  |
| 106 | 1 | 0 | 3.025459  | -2.698166 | 1.751069  |
| 107 | 1 | 0 | 3.655380  | -3.152025 | 3.375098  |
| 108 | 1 | 0 | 2.584791  | -1.734328 | 3.183889  |
| 109 | 6 | 0 | 7.771689  | -3.094219 | -1.040922 |
| 110 | 6 | 0 | 7.579865  | -4.551933 | -1.485202 |
| 111 | 6 | 0 | 9.247684  | -2.683377 | -0.932902 |
| 112 | 1 | 0 | 7.253307  | -2.428794 | -1.753574 |
| 113 | 1 | 0 | 6.509332  | -4.807669 | -1.555292 |
| 114 | 1 | 0 | 8.033594  | -4.693433 | -2.480882 |
| 115 | 1 | 0 | 8.065861  | -5.262578 | -0.792864 |
| 116 | 1 | 0 | 9.346362  | -1.631477 | -0.615212 |
| 117 | 1 | 0 | 9.798864  | -3.316432 | -0.214381 |
| 118 | 1 | 0 | 9.733907  | -2.796208 | -1.916855 |
| 119 | 6 | 0 | 7.381727  | 1.441281  | -2.507798 |
| 120 | 6 | 0 | 8.823638  | 1.273588  | -3.006367 |
| 121 | 6 | 0 | 6.492578  | 2.204522  | -3.504211 |
| 122 | 1 | 0 | 6.948223  | 0.440708  | -2.344508 |
| 123 | 1 | 0 | 9.462417  | 0.783753  | -2.250968 |
| 124 | 1 | 0 | 8.819138  | 0.646130  | -3.913699 |
| 125 | 1 | 0 | 9.286406  | 2.237438  | -3.284717 |
| 126 | 1 | 0 | 5.460779  | 2.276880  | -3.121000 |
| 127 | 1 | 0 | 6.879970  | 3.224741  | -3.678060 |
| 128 | 1 | 0 | 6.467160  | 1.674542  | -4.472249 |
| 129 | 6 | 0 | 5.864788  | 3.112299  | 1.979955  |

|     |   |   |           |           |           |
|-----|---|---|-----------|-----------|-----------|
| 130 | 6 | 0 | 5.336284  | 4.536510  | 2.209174  |
| 131 | 6 | 0 | 6.837751  | 2.672167  | 3.088951  |
| 132 | 1 | 0 | 5.016358  | 2.409774  | 1.935787  |
| 133 | 1 | 0 | 4.667274  | 4.856326  | 1.393363  |
| 134 | 1 | 0 | 4.768736  | 4.572171  | 3.154739  |
| 135 | 1 | 0 | 6.158979  | 5.270166  | 2.289988  |
| 136 | 1 | 0 | 7.228989  | 1.660321  | 2.886972  |
| 137 | 1 | 0 | 7.696323  | 3.362824  | 3.168829  |
| 138 | 1 | 0 | 6.321471  | 2.661166  | 4.064427  |
| 139 | 5 | 0 | -5.173887 | -0.916150 | 0.238969  |
| 140 | 5 | 0 | 5.173860  | 0.916166  | -0.238928 |

2PB-d

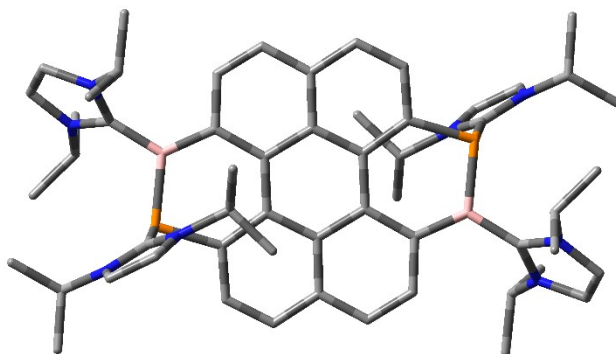

UB3LYP/6-31G\*

| Center Number | Atomic Number | Atomic Type | Coordinates (Angstroms) |           |           |
|---------------|---------------|-------------|-------------------------|-----------|-----------|
|               |               |             | X                       | Y         | Z         |
| 1             | 6             | 0           | -2.316982               | -1.185834 | -1.267415 |
| 2             | 6             | 0           | -1.193880               | -0.561510 | -0.616822 |
| 3             | 6             | 0           | 0.106316                | -1.193102 | -0.763882 |
| 4             | 6             | 0           | 0.195033                | -2.416593 | -1.525342 |
| 5             | 6             | 0           | -0.916886               | -2.931939 | -2.207409 |
| 6             | 6             | 0           | -2.140861               | -2.312212 | -2.090564 |
| 7             | 6             | 0           | 1.301994                | -0.656591 | -0.162543 |
| 8             | 6             | 0           | 1.421626                | -3.137017 | -1.573064 |
| 9             | 1             | 0           | -0.799608               | -3.830427 | -2.808568 |
| 10            | 1             | 0           | -3.003556               | -2.716913 | -2.615363 |
| 11            | 6             | 0           | 2.531639                | -2.647135 | -0.965001 |
| 12            | 6             | 0           | 2.571239                | -1.371343 | -0.309108 |
| 13            | 1             | 0           | 1.439929                | -4.092082 | -2.094065 |
| 14            | 1             | 0           | 3.440043                | -3.243835 | -0.985005 |
| 15            | 6             | 0           | -2.531630               | 2.647102  | 0.965109  |
| 16            | 6             | 0           | -1.421617               | 3.136981  | 1.573175  |

|    |    |   |           |           |           |
|----|----|---|-----------|-----------|-----------|
| 17 | 6  | 0 | -0.195021 | 2.416564  | 1.525437  |
| 18 | 6  | 0 | -0.106305 | 1.193077  | 0.763971  |
| 19 | 6  | 0 | -1.301984 | 0.656568  | 0.162631  |
| 20 | 6  | 0 | -2.571228 | 1.371321  | 0.309198  |
| 21 | 1  | 0 | 0.799625  | 3.830402  | 2.808657  |
| 22 | 1  | 0 | -3.440035 | 3.243800  | 0.985121  |
| 23 | 1  | 0 | -1.439922 | 4.092040  | 2.094186  |
| 24 | 6  | 0 | 0.916903  | 2.931916  | 2.207494  |
| 25 | 6  | 0 | 1.193893  | 0.561491  | 0.616901  |
| 26 | 6  | 0 | 2.317001  | 1.185826  | 1.267475  |
| 27 | 6  | 0 | 2.140882  | 2.312203  | 2.090627  |
| 28 | 1  | 0 | 3.003582  | 2.716913  | 2.615410  |
| 29 | 15 | 0 | 4.066683  | 0.726918  | 1.114942  |
| 30 | 15 | 0 | -4.066662 | -0.726904 | -1.114916 |
| 31 | 6  | 0 | 7.050968  | -2.888858 | -0.656030 |
| 32 | 6  | 0 | 7.080000  | -2.946763 | 0.698505  |
| 33 | 1  | 0 | 7.737394  | -3.285273 | -1.386895 |
| 34 | 1  | 0 | 7.791007  | -3.412456 | 1.362076  |
| 35 | 6  | 0 | 6.083177  | 3.501099  | -1.176076 |
| 36 | 6  | 0 | 5.024990  | 3.332099  | -2.009159 |
| 37 | 1  | 0 | 6.952921  | 4.131741  | -1.268118 |
| 38 | 1  | 0 | 4.802749  | 3.794771  | -2.957258 |
| 39 | 6  | 0 | -5.025069 | -3.332167 | 2.009084  |
| 40 | 6  | 0 | -6.083267 | -3.501086 | 1.175998  |
| 41 | 1  | 0 | -4.802845 | -3.794890 | 2.957161  |
| 42 | 1  | 0 | -6.953037 | -4.131695 | 1.268015  |
| 43 | 6  | 0 | -7.050929 | 2.888953  | 0.655961  |
| 44 | 6  | 0 | -7.079934 | 2.946804  | -0.698577 |
| 45 | 1  | 0 | -7.737360 | 3.285414  | 1.386796  |
| 46 | 1  | 0 | -7.790918 | 3.412486  | -1.362180 |
| 47 | 6  | 0 | 5.222413  | -1.796676 | 0.110900  |
| 48 | 6  | 0 | 4.701294  | 1.993322  | -0.232456 |
| 49 | 6  | 0 | -4.701320 | -1.993333 | 0.232433  |
| 50 | 6  | 0 | -5.222385 | 1.796698  | -0.110890 |
| 51 | 7  | 0 | 5.910121  | -2.186127 | -1.008883 |
| 52 | 7  | 0 | 5.956599  | -2.281906 | 1.160089  |
| 53 | 7  | 0 | 4.188769  | 2.398555  | -1.424834 |
| 54 | 7  | 0 | 5.872107  | 2.676699  | -0.084812 |
| 55 | 7  | 0 | -5.872161 | -2.676655 | 0.084764  |
| 56 | 7  | 0 | -4.188809 | -2.398635 | 1.424795  |
| 57 | 7  | 0 | -5.910108 | 2.186208  | 1.008865  |
| 58 | 7  | 0 | -5.956543 | 2.281898  | -1.160112 |
| 59 | 6  | 0 | 5.569156  | -1.797594 | -2.395679 |
| 60 | 6  | 0 | 5.468072  | -3.027429 | -3.302597 |

|     |   |   |           |           |           |
|-----|---|---|-----------|-----------|-----------|
| 61  | 6 | 0 | 6.576025  | -0.765383 | -2.918337 |
| 62  | 1 | 0 | 4.583950  | -1.333422 | -2.312882 |
| 63  | 1 | 0 | 4.742398  | -3.746818 | -2.913954 |
| 64  | 1 | 0 | 5.138859  | -2.718133 | -4.299704 |
| 65  | 1 | 0 | 6.434578  | -3.532004 | -3.416652 |
| 66  | 1 | 0 | 6.616003  | 0.110963  | -2.263269 |
| 67  | 1 | 0 | 7.584438  | -1.188304 | -2.991919 |
| 68  | 1 | 0 | 6.281530  | -0.432997 | -3.919415 |
| 69  | 6 | 0 | 5.540776  | -2.243943 | 2.581622  |
| 70  | 6 | 0 | 6.568862  | -1.490365 | 3.428339  |
| 71  | 6 | 0 | 5.267416  | -3.662830 | 3.093365  |
| 72  | 1 | 0 | 4.602131  | -1.684573 | 2.573988  |
| 73  | 1 | 0 | 6.715489  | -0.475359 | 3.047786  |
| 74  | 1 | 0 | 6.211829  | -1.418559 | 4.460673  |
| 75  | 1 | 0 | 7.537547  | -2.004181 | 3.446647  |
| 76  | 1 | 0 | 4.523421  | -4.166019 | 2.468166  |
| 77  | 1 | 0 | 6.177536  | -4.273384 | 3.111561  |
| 78  | 1 | 0 | 4.879141  | -3.613770 | 4.115788  |
| 79  | 6 | 0 | 6.799088  | 2.595922  | 1.073452  |
| 80  | 6 | 0 | 6.959515  | 3.972223  | 1.725885  |
| 81  | 6 | 0 | 8.132376  | 1.974538  | 0.646668  |
| 82  | 1 | 0 | 6.296055  | 1.927136  | 1.775125  |
| 83  | 1 | 0 | 5.987836  | 4.385526  | 2.013199  |
| 84  | 1 | 0 | 7.570790  | 3.876478  | 2.628927  |
| 85  | 1 | 0 | 7.459023  | 4.687791  | 1.062915  |
| 86  | 1 | 0 | 7.982542  | 0.982303  | 0.208596  |
| 87  | 1 | 0 | 8.657528  | 2.599502  | -0.084914 |
| 88  | 1 | 0 | 8.783965  | 1.868057  | 1.520087  |
| 89  | 6 | 0 | 2.890513  | 1.973689  | -2.014910 |
| 90  | 6 | 0 | 3.075837  | 1.547577  | -3.473931 |
| 91  | 6 | 0 | 1.851781  | 3.086954  | -1.851316 |
| 92  | 1 | 0 | 2.583894  | 1.104396  | -1.437309 |
| 93  | 1 | 0 | 3.858482  | 0.788858  | -3.572291 |
| 94  | 1 | 0 | 2.137881  | 1.115617  | -3.835336 |
| 95  | 1 | 0 | 3.323997  | 2.391566  | -4.128044 |
| 96  | 1 | 0 | 1.737188  | 3.364670  | -0.800471 |
| 97  | 1 | 0 | 2.128975  | 3.978177  | -2.427833 |
| 98  | 1 | 0 | 0.881738  | 2.733870  | -2.213899 |
| 99  | 6 | 0 | -5.569182 | 1.797727  | 2.395685  |
| 100 | 6 | 0 | -6.576098 | 0.765577  | 2.918373  |
| 101 | 6 | 0 | -5.468072 | 3.027601  | 3.302548  |
| 102 | 1 | 0 | -4.583990 | 1.333518  | 2.312928  |
| 103 | 1 | 0 | -6.616093 | -0.110801 | 2.263348  |
| 104 | 1 | 0 | -6.281638 | 0.433232  | 3.919475  |

|     |   |   |           |           |           |
|-----|---|---|-----------|-----------|-----------|
| 105 | 1 | 0 | -7.584498 | 1.188538  | 2.991910  |
| 106 | 1 | 0 | -4.742367 | 3.746949  | 2.913885  |
| 107 | 1 | 0 | -6.434563 | 3.532213  | 3.416563  |
| 108 | 1 | 0 | -5.138886 | 2.718340  | 4.299675  |
| 109 | 6 | 0 | -5.540696 | 2.243867  | -2.581637 |
| 110 | 6 | 0 | -5.267296 | 3.662727  | -3.093434 |
| 111 | 6 | 0 | -6.568783 | 1.490276  | -3.428341 |
| 112 | 1 | 0 | -4.602063 | 1.684477  | -2.573963 |
| 113 | 1 | 0 | -4.523303 | 4.165927  | -2.468242 |
| 114 | 1 | 0 | -4.879003 | 3.613616  | -4.115847 |
| 115 | 1 | 0 | -6.177403 | 4.273299  | -3.111674 |
| 116 | 1 | 0 | -6.715437 | 0.475288  | -3.047748 |
| 117 | 1 | 0 | -7.537456 | 2.004111  | -3.446685 |
| 118 | 1 | 0 | -6.211734 | 1.418419  | -4.460665 |
| 119 | 6 | 0 | -2.890527 | -1.973862 | 2.014885  |
| 120 | 6 | 0 | -1.851850 | -3.087168 | 1.851217  |
| 121 | 6 | 0 | -3.075817 | -1.547831 | 3.473933  |
| 122 | 1 | 0 | -2.583874 | -1.104550 | 1.437333  |
| 123 | 1 | 0 | -1.737278 | -3.364829 | 0.800356  |
| 124 | 1 | 0 | -0.881787 | -2.734151 | 2.213813  |
| 125 | 1 | 0 | -2.129084 | -3.978411 | 2.427685  |
| 126 | 1 | 0 | -3.858426 | -0.789083 | 3.572349  |
| 127 | 1 | 0 | -3.324009 | -2.391849 | 4.127997  |
| 128 | 1 | 0 | -2.137837 | -1.115938 | 3.835354  |
| 129 | 6 | 0 | -6.799139 | -2.595793 | -1.073496 |
| 130 | 6 | 0 | -8.132400 | -1.974366 | -0.646690 |
| 131 | 6 | 0 | -6.959628 | -3.972064 | -1.725979 |
| 132 | 1 | 0 | -6.296076 | -1.927004 | -1.775145 |
| 133 | 1 | 0 | -7.982523 | -0.982153 | -0.208584 |
| 134 | 1 | 0 | -8.783985 | -1.867827 | -1.520105 |
| 135 | 1 | 0 | -8.657577 | -2.599333 | 0.084871  |
| 136 | 1 | 0 | -5.987968 | -4.385401 | -2.013307 |
| 137 | 1 | 0 | -7.459169 | -4.687632 | -1.063036 |
| 138 | 1 | 0 | -7.570896 | -3.876257 | -2.629019 |
| 139 | 5 | 0 | -3.909550 | 0.926893  | -0.205829 |
| 140 | 5 | 0 | 3.909564  | -0.926900 | 0.205894  |

-----

**UWB97XD/6-31G\***

-----

| Center<br>Number | Atomic<br>Number | Atomic<br>Type | Coordinates (Angstroms) |           |           |
|------------------|------------------|----------------|-------------------------|-----------|-----------|
|                  |                  |                | X                       | Y         | Z         |
| 1                | 6                | 0              | -2.246402               | -1.112402 | -1.423807 |

|    |    |   |           |           |           |
|----|----|---|-----------|-----------|-----------|
| 2  | 6  | 0 | -1.154395 | -0.514828 | -0.711155 |
| 3  | 6  | 0 | 0.143798  | -1.137633 | -0.832569 |
| 4  | 6  | 0 | 0.273535  | -2.301411 | -1.666525 |
| 5  | 6  | 0 | -0.805133 | -2.784848 | -2.413140 |
| 6  | 6  | 0 | -2.038174 | -2.190490 | -2.293435 |
| 7  | 6  | 0 | 1.297884  | -0.649126 | -0.132809 |
| 8  | 6  | 0 | 1.511340  | -3.004537 | -1.721916 |
| 9  | 1  | 0 | -0.659960 | -3.644234 | -3.062151 |
| 10 | 1  | 0 | -2.882987 | -2.580637 | -2.856223 |
| 11 | 6  | 0 | 2.584630  | -2.552429 | -1.036309 |
| 12 | 6  | 0 | 2.573144  | -1.336144 | -0.278672 |
| 13 | 1  | 0 | 1.562425  | -3.916883 | -2.311374 |
| 14 | 1  | 0 | 3.506017  | -3.130481 | -1.068890 |
| 15 | 6  | 0 | -2.584592 | 2.552491  | 1.036769  |
| 16 | 6  | 0 | -1.511258 | 3.004665  | 1.722286  |
| 17 | 6  | 0 | -0.273435 | 2.301623  | 1.666781  |
| 18 | 6  | 0 | -0.143725 | 1.137813  | 0.832869  |
| 19 | 6  | 0 | -1.297832 | 0.649280  | 0.133156  |
| 20 | 6  | 0 | -2.573088 | 1.336262  | 0.279074  |
| 21 | 1  | 0 | 0.660159  | 3.644600  | 3.062212  |
| 22 | 1  | 0 | -3.506005 | 3.130490  | 1.069451  |
| 23 | 1  | 0 | -1.562350 | 3.917010  | 2.311746  |
| 24 | 6  | 0 | 0.805310  | 2.785182  | 2.413241  |
| 25 | 6  | 0 | 1.154480  | 0.515015  | 0.711416  |
| 26 | 6  | 0 | 2.246562  | 1.112719  | 1.423863  |
| 27 | 6  | 0 | 2.038359  | 2.190901  | 2.293410  |
| 28 | 1  | 0 | 2.883225  | 2.581157  | 2.856045  |
| 29 | 15 | 0 | 3.999027  | 0.705308  | 1.269936  |
| 30 | 15 | 0 | -3.998865 | -0.704890 | -1.270042 |
| 31 | 6  | 0 | 7.090591  | -2.436191 | -0.958248 |
| 32 | 6  | 0 | 7.208499  | -2.674546 | 0.368317  |
| 33 | 1  | 0 | 7.760703  | -2.660028 | -1.772617 |
| 34 | 1  | 0 | 7.997510  | -3.151738 | 0.926831  |
| 35 | 6  | 0 | 6.015791  | 3.332724  | -1.097384 |
| 36 | 6  | 0 | 4.902348  | 3.230668  | -1.860498 |
| 37 | 1  | 0 | 6.915718  | 3.906295  | -1.245717 |
| 38 | 1  | 0 | 4.648452  | 3.707408  | -2.793060 |
| 39 | 6  | 0 | -4.902532 | -3.230570 | 1.859952  |
| 40 | 6  | 0 | -6.015845 | -3.332623 | 1.096646  |
| 41 | 1  | 0 | -4.648792 | -3.707332 | 2.792542  |
| 42 | 1  | 0 | -6.915798 | -3.906193 | 1.244815  |
| 43 | 6  | 0 | -7.090607 | 2.436116  | 0.958722  |
| 44 | 6  | 0 | -7.208618 | 2.674363  | -0.367852 |
| 45 | 1  | 0 | -7.760671 | 2.659989  | 1.773121  |



|    |   |   |           |           |           |
|----|---|---|-----------|-----------|-----------|
| 46 | 1 | 0 | -7.997689 | 3.151475  | -0.926349 |
| 47 | 6 | 0 | 5.234918  | -1.651904 | 0.039383  |
| 48 | 6 | 0 | 4.607964  | 1.923942  | -0.073099 |
| 49 | 6 | 0 | -4.607903 | -1.923742 | 0.072674  |
| 50 | 6 | 0 | -5.234922 | 1.651914  | -0.038966 |
| 51 | 7 | 0 | 5.875987  | -1.809093 | -1.147860 |
| 52 | 7 | 0 | 6.062228  | -2.193570 | 0.967465  |
| 53 | 7 | 0 | 4.053484  | 2.350981  | -1.228488 |
| 54 | 7 | 0 | 5.817911  | 2.528900  | 0.004960  |
| 55 | 7 | 0 | -5.817783 | -2.528785 | -0.005660 |
| 56 | 7 | 0 | -4.053532 | -2.350918 | 1.228068  |
| 57 | 7 | 0 | -5.875973 | 1.809062  | 1.148302  |
| 58 | 7 | 0 | -6.062365 | 2.193396  | -0.967036 |
| 59 | 6 | 0 | 5.406702  | -1.255352 | -2.427520 |
| 60 | 6 | 0 | 5.304827  | -2.343941 | -3.489764 |
| 61 | 6 | 0 | 6.306584  | -0.094930 | -2.846092 |
| 62 | 1 | 0 | 4.405184  | -0.877791 | -2.207871 |
| 63 | 1 | 0 | 4.647947  | -3.151402 | -3.157368 |
| 64 | 1 | 0 | 4.883578  | -1.919017 | -4.405398 |
| 65 | 1 | 0 | 6.286103  | -2.763804 | -3.738195 |
| 66 | 1 | 0 | 6.344607  | 0.668261  | -2.063228 |
| 67 | 1 | 0 | 7.328446  | -0.433548 | -3.050595 |
| 68 | 1 | 0 | 5.919254  | 0.367921  | -3.758751 |
| 69 | 6 | 0 | 5.749649  | -2.308159 | 2.400997  |
| 70 | 6 | 0 | 6.674263  | -1.411440 | 3.217979  |
| 71 | 6 | 0 | 5.792117  | -3.770518 | 2.836013  |
| 72 | 1 | 0 | 4.722809  | -1.941057 | 2.485798  |
| 73 | 1 | 0 | 6.566415  | -0.368744 | 2.906854  |
| 74 | 1 | 0 | 6.413216  | -1.479793 | 4.277895  |
| 75 | 1 | 0 | 7.722724  | -1.712102 | 3.107646  |
| 76 | 1 | 0 | 5.135656  | -4.381124 | 2.209772  |
| 77 | 1 | 0 | 6.806601  | -4.181387 | 2.786240  |
| 78 | 1 | 0 | 5.452781  | -3.851075 | 3.872491  |
| 79 | 6 | 0 | 6.825026  | 2.288306  | 1.057445  |
| 80 | 6 | 0 | 7.540513  | 3.580877  | 1.433951  |
| 81 | 6 | 0 | 7.782789  | 1.187046  | 0.608590  |
| 82 | 1 | 0 | 6.249026  | 1.934391  | 1.915661  |
| 83 | 1 | 0 | 6.826330  | 4.373511  | 1.673900  |
| 84 | 1 | 0 | 8.158485  | 3.398991  | 2.317419  |
| 85 | 1 | 0 | 8.206763  | 3.932821  | 0.638943  |
| 86 | 1 | 0 | 7.238519  | 0.263621  | 0.388588  |
| 87 | 1 | 0 | 8.334484  | 1.487753  | -0.289293 |
| 88 | 1 | 0 | 8.507346  | 0.976463  | 1.400977  |
| 89 | 6 | 0 | 2.719026  | 1.973189  | -1.741791 |

|     |   |   |           |           |           |
|-----|---|---|-----------|-----------|-----------|
| 90  | 6 | 0 | 2.780723  | 1.653888  | -3.231291 |
| 91  | 6 | 0 | 1.699540  | 3.056660  | -1.408964 |
| 92  | 1 | 0 | 2.461190  | 1.057031  | -1.218822 |
| 93  | 1 | 0 | 3.567443  | 0.926283  | -3.451666 |
| 94  | 1 | 0 | 1.823849  | 1.214839  | -3.526048 |
| 95  | 1 | 0 | 2.941293  | 2.545402  | -3.847903 |
| 96  | 1 | 0 | 1.694454  | 3.271764  | -0.337251 |
| 97  | 1 | 0 | 1.912501  | 3.980551  | -1.960201 |
| 98  | 1 | 0 | 0.699871  | 2.708037  | -1.683370 |
| 99  | 6 | 0 | -5.406724 | 1.255251  | 2.427951  |
| 100 | 6 | 0 | -6.306500 | 0.094663  | 2.846297  |
| 101 | 6 | 0 | -5.305152 | 2.343738  | 3.490325  |
| 102 | 1 | 0 | -4.405128 | 0.877847  | 2.208399  |
| 103 | 1 | 0 | -6.344178 | -0.668525 | 2.063414  |
| 104 | 1 | 0 | -5.919316 | -0.368129 | 3.759046  |
| 105 | 1 | 0 | -7.328475 | 0.433095  | 3.050546  |
| 106 | 1 | 0 | -4.648342 | 3.151331  | 3.158114  |
| 107 | 1 | 0 | -6.286520 | 2.763432  | 3.738681  |
| 108 | 1 | 0 | -4.883964 | 1.918761  | 4.405963  |
| 109 | 6 | 0 | -5.749945 | 2.307773  | -2.400613 |
| 110 | 6 | 0 | -5.792694 | 3.770038  | -2.835922 |
| 111 | 6 | 0 | -6.674459 | 1.410719  | -3.217347 |
| 112 | 1 | 0 | -4.723051 | 1.940832  | -2.485432 |
| 113 | 1 | 0 | -5.136281 | 4.380890  | -2.209872 |
| 114 | 1 | 0 | -5.453465 | 3.850436  | -3.872449 |
| 115 | 1 | 0 | -6.807241 | 4.180749  | -2.786151 |
| 116 | 1 | 0 | -6.566463 | 0.368111  | -2.905980 |
| 117 | 1 | 0 | -7.722955 | 1.711259  | -3.107040 |
| 118 | 1 | 0 | -6.413460 | 1.478853  | -4.277287 |
| 119 | 6 | 0 | -2.719111 | -1.973196 | 1.741551  |
| 120 | 6 | 0 | -1.699630 | -3.056737 | 1.408922  |
| 121 | 6 | 0 | -2.780973 | -1.653820 | 3.231029  |
| 122 | 1 | 0 | -2.461144 | -1.057068 | 1.218576  |
| 123 | 1 | 0 | -1.694404 | -3.271908 | 0.337224  |
| 124 | 1 | 0 | -0.699976 | -2.708161 | 1.683443  |
| 125 | 1 | 0 | -1.912722 | -3.980584 | 1.960183  |
| 126 | 1 | 0 | -3.567672 | -0.926158 | 3.451288  |
| 127 | 1 | 0 | -2.941650 | -2.545293 | 3.847669  |
| 128 | 1 | 0 | -1.824105 | -1.214818 | 3.525872  |
| 129 | 6 | 0 | -6.824714 | -2.288240 | -1.058333 |
| 130 | 6 | 0 | -7.782859 | -1.187319 | -0.609464 |
| 131 | 6 | 0 | -7.539742 | -3.580922 | -1.435316 |
| 132 | 1 | 0 | -6.248608 | -1.933972 | -1.916338 |
| 133 | 1 | 0 | -7.238846 | -0.263811 | -0.389157 |

|     |   |   |           |           |           |
|-----|---|---|-----------|-----------|-----------|
| 134 | 1 | 0 | -8.507290 | -0.976744 | -1.401968 |
| 135 | 1 | 0 | -8.334692 | -1.488332 | 0.288232  |
| 136 | 1 | 0 | -6.825254 | -4.373259 | -1.675336 |
| 137 | 1 | 0 | -8.206027 | -3.933298 | -0.640531 |
| 138 | 1 | 0 | -8.157605 | -3.398994 | -2.318851 |
| 139 | 5 | 0 | -3.878750 | 0.900971  | -0.294905 |
| 140 | 5 | 0 | 3.878783  | -0.900823 | 0.295232  |

-----

**UM06-2X/6-31G\***

-----

| Center<br>Number | Atomic<br>Number | Atomic<br>Type | Coordinates (Angstroms) |           |           |
|------------------|------------------|----------------|-------------------------|-----------|-----------|
|                  |                  |                | X                       | Y         | Z         |
| 1                | 6                | 0              | -2.264685               | -1.119224 | -1.399537 |
| 2                | 6                | 0              | -1.165283               | -0.519954 | -0.695560 |
| 3                | 6                | 0              | 0.136261                | -1.136310 | -0.836452 |
| 4                | 6                | 0              | 0.260679                | -2.298854 | -1.674077 |
| 5                | 6                | 0              | -0.826919               | -2.791504 | -2.401106 |
| 6                | 6                | 0              | -2.061951               | -2.199591 | -2.269066 |
| 7                | 6                | 0              | 1.299769                | -0.642530 | -0.153505 |
| 8                | 6                | 0              | 1.506551                | -2.988598 | -1.762224 |
| 9                | 1                | 0              | -0.684408               | -3.651832 | -3.049176 |
| 10               | 1                | 0              | -2.911744               | -2.591262 | -2.823167 |
| 11               | 6                | 0              | 2.588881                | -2.531464 | -1.094406 |
| 12               | 6                | 0              | 2.576651                | -1.323593 | -0.317360 |
| 13               | 1                | 0              | 1.552522                | -3.892568 | -2.364557 |
| 14               | 1                | 0              | 3.518500                | -3.096051 | -1.151908 |
| 15               | 6                | 0              | -2.589004               | 2.532432  | 1.092490  |
| 16               | 6                | 0              | -1.506693               | 2.989731  | 1.760115  |
| 17               | 6                | 0              | -0.260835               | 2.299726  | 1.672400  |
| 18               | 6                | 0              | -0.136477               | 1.136886  | 0.835159  |
| 19               | 6                | 0              | -1.299984               | 0.642987  | 0.152319  |
| 20               | 6                | 0              | -2.576939               | 1.324067  | 0.316053  |
| 21               | 1                | 0              | 0.684211                | 3.653058  | 3.047091  |
| 22               | 1                | 0              | -3.518574               | 3.097133  | 1.149683  |
| 23               | 1                | 0              | -1.552544               | 3.893993  | 2.362021  |
| 24               | 6                | 0              | 0.826654                | 2.792438  | 2.399388  |
| 25               | 6                | 0              | 1.164990                | 0.520386  | 0.694569  |
| 26               | 6                | 0              | 2.264277                | 1.119556  | 1.398755  |
| 27               | 6                | 0              | 2.061651                | 2.200175  | 2.267892  |
| 28               | 1                | 0              | 2.911366                | 2.591813  | 2.822133  |
| 29               | 15               | 0              | 4.019671                | 0.692261  | 1.264819  |
| 30               | 15               | 0              | -4.020099               | -0.692664 | -1.264807 |

|    |   |   |           |           |           |
|----|---|---|-----------|-----------|-----------|
| 31 | 6 | 0 | 7.111653  | -2.468275 | -0.909357 |
| 32 | 6 | 0 | 7.208429  | -2.677571 | 0.426024  |
| 33 | 1 | 0 | 7.795591  | -2.707245 | -1.708493 |
| 34 | 1 | 0 | 7.989156  | -3.140160 | 1.009058  |
| 35 | 6 | 0 | 6.040811  | 3.364141  | -1.082592 |
| 36 | 6 | 0 | 4.928888  | 3.255865  | -1.852353 |
| 37 | 1 | 0 | 6.935928  | 3.948076  | -1.222113 |
| 38 | 1 | 0 | 4.672134  | 3.733652  | -2.784399 |
| 39 | 6 | 0 | -4.927721 | -3.255391 | 1.853799  |
| 40 | 6 | 0 | -6.039953 | -3.364104 | 1.084542  |
| 41 | 1 | 0 | -4.670506 | -3.732833 | 2.785894  |
| 42 | 1 | 0 | -6.934918 | -3.948135 | 1.224648  |
| 43 | 6 | 0 | -7.111828 | 2.467790  | 0.909833  |
| 44 | 6 | 0 | -7.209183 | 2.676909  | -0.425537 |
| 45 | 1 | 0 | -7.795497 | 2.706710  | 1.709216  |
| 46 | 1 | 0 | -7.990243 | 3.139259  | -1.008315 |
| 47 | 6 | 0 | 5.234453  | -1.670446 | 0.041003  |
| 48 | 6 | 0 | 4.638965  | 1.937867  | -0.069651 |
| 49 | 6 | 0 | -4.638752 | -1.937969 | 0.070505  |
| 50 | 6 | 0 | -5.234831 | 1.670282  | -0.041189 |
| 51 | 7 | 0 | 5.895820  | -1.854304 | -1.131488 |
| 52 | 7 | 0 | 6.049231  | -2.190151 | 0.994379  |
| 53 | 7 | 0 | 4.086955  | 2.367085  | -1.224363 |
| 54 | 7 | 0 | 5.843568  | 2.553484  | 0.014979  |
| 55 | 7 | 0 | -5.843291 | -2.553801 | -0.013400 |
| 56 | 7 | 0 | -4.086147 | -2.366788 | 1.225063  |
| 57 | 7 | 0 | -5.895800 | 1.854057  | 1.131536  |
| 58 | 7 | 0 | -6.050113 | 2.189650  | -0.994288 |
| 59 | 6 | 0 | 5.452689  | -1.317265 | -2.429917 |
| 60 | 6 | 0 | 5.478669  | -2.401915 | -3.499231 |
| 61 | 6 | 0 | 6.306775  | -0.103963 | -2.789203 |
| 62 | 1 | 0 | 4.419888  | -1.001172 | -2.259524 |
| 63 | 1 | 0 | 4.868969  | -3.258121 | -3.200011 |
| 64 | 1 | 0 | 5.072622  | -2.001068 | -4.431644 |
| 65 | 1 | 0 | 6.498437  | -2.746455 | -3.701792 |
| 66 | 1 | 0 | 6.231095  | 0.662883  | -2.010541 |
| 67 | 1 | 0 | 7.360336  | -0.383331 | -2.901469 |
| 68 | 1 | 0 | 5.969974  | 0.328178  | -3.736127 |
| 69 | 6 | 0 | 5.721105  | -2.278988 | 2.428570  |
| 70 | 6 | 0 | 6.627404  | -1.354830 | 3.234064  |
| 71 | 6 | 0 | 5.795109  | -3.730600 | 2.892091  |
| 72 | 1 | 0 | 4.686859  | -1.928545 | 2.495089  |
| 73 | 1 | 0 | 6.494083  | -0.317143 | 2.915812  |
| 74 | 1 | 0 | 6.374213  | -1.423336 | 4.295432  |

|     |   |   |           |           |           |
|-----|---|---|-----------|-----------|-----------|
| 75  | 1 | 0 | 7.680379  | -1.636177 | 3.117229  |
| 76  | 1 | 0 | 5.163517  | -4.370522 | 2.270750  |
| 77  | 1 | 0 | 6.821438  | -4.111250 | 2.860289  |
| 78  | 1 | 0 | 5.448127  | -3.799179 | 3.926209  |
| 79  | 6 | 0 | 6.854600  | 2.294791  | 1.061980  |
| 80  | 6 | 0 | 7.677560  | 3.545575  | 1.342832  |
| 81  | 6 | 0 | 7.718277  | 1.107971  | 0.642429  |
| 82  | 1 | 0 | 6.277552  | 2.029479  | 1.951414  |
| 83  | 1 | 0 | 7.036434  | 4.407910  | 1.543295  |
| 84  | 1 | 0 | 8.299259  | 3.368363  | 2.223735  |
| 85  | 1 | 0 | 8.350349  | 3.786068  | 0.513460  |
| 86  | 1 | 0 | 7.100890  | 0.217593  | 0.479161  |
| 87  | 1 | 0 | 8.256768  | 1.333963  | -0.284875 |
| 88  | 1 | 0 | 8.451922  | 0.881600  | 1.421902  |
| 89  | 6 | 0 | 2.759374  | 1.965408  | -1.740900 |
| 90  | 6 | 0 | 2.833252  | 1.679924  | -3.235923 |
| 91  | 6 | 0 | 1.716512  | 3.021110  | -1.394131 |
| 92  | 1 | 0 | 2.532314  | 1.033301  | -1.229599 |
| 93  | 1 | 0 | 3.641526  | 0.979370  | -3.467245 |
| 94  | 1 | 0 | 1.889061  | 1.224129  | -3.544854 |
| 95  | 1 | 0 | 2.973241  | 2.590602  | -3.828092 |
| 96  | 1 | 0 | 1.703852  | 3.221845  | -0.319095 |
| 97  | 1 | 0 | 1.916736  | 3.954545  | -1.933391 |
| 98  | 1 | 0 | 0.725432  | 2.656627  | -1.680533 |
| 99  | 6 | 0 | -5.451918 | 1.317491  | 2.429914  |
| 100 | 6 | 0 | -6.305821 | 0.104362  | 2.790202  |
| 101 | 6 | 0 | -5.477218 | 2.402573  | 3.498806  |
| 102 | 1 | 0 | -4.419239 | 1.001291  | 2.258997  |
| 103 | 1 | 0 | -6.230687 | -0.662778 | 2.011785  |
| 104 | 1 | 0 | -5.968396 | -0.327439 | 3.737059  |
| 105 | 1 | 0 | -7.359297 | 0.383812  | 2.903074  |
| 106 | 1 | 0 | -4.867613 | 3.258604  | 3.198893  |
| 107 | 1 | 0 | -6.496844 | 2.747282  | 3.701799  |
| 108 | 1 | 0 | -5.070677 | 2.002072  | 4.431153  |
| 109 | 6 | 0 | -5.722665 | 2.278080  | -2.428661 |
| 110 | 6 | 0 | -5.797260 | 3.729510  | -2.892654 |
| 111 | 6 | 0 | -6.629106 | 1.353399  | -3.233395 |
| 112 | 1 | 0 | -4.688360 | 1.927860  | -2.495499 |
| 113 | 1 | 0 | -5.165559 | 4.369823  | -2.271826 |
| 114 | 1 | 0 | -5.450762 | 3.797817  | -3.926952 |
| 115 | 1 | 0 | -6.823671 | 4.109907  | -2.860534 |
| 116 | 1 | 0 | -6.495377 | 0.315866  | -2.914811 |
| 117 | 1 | 0 | -7.682095 | 1.634544  | -3.116181 |
| 118 | 1 | 0 | -6.376409 | 1.421570  | -4.294901 |

|     |   |   |           |           |           |
|-----|---|---|-----------|-----------|-----------|
| 119 | 6 | 0 | -2.758257 | -1.964875 | 1.740595  |
| 120 | 6 | 0 | -1.715514 | -3.020511 | 1.393244  |
| 121 | 6 | 0 | -2.831110 | -1.679151 | 3.235619  |
| 122 | 1 | 0 | -2.531685 | -1.032824 | 1.228954  |
| 123 | 1 | 0 | -1.703547 | -3.221374 | 0.318219  |
| 124 | 1 | 0 | -0.724279 | -2.655891 | 1.678935  |
| 125 | 1 | 0 | -1.915291 | -3.953900 | 1.932751  |
| 126 | 1 | 0 | -3.639374 | -0.978735 | 3.467416  |
| 127 | 1 | 0 | -2.970452 | -2.589756 | 3.828054  |
| 128 | 1 | 0 | -1.886794 | -1.223090 | 3.543775  |
| 129 | 6 | 0 | -6.854743 | -2.295720 | -1.060154 |
| 130 | 6 | 0 | -7.718482 | -1.108859 | -0.640856 |
| 131 | 6 | 0 | -7.677599 | -3.546765 | -1.340138 |
| 132 | 1 | 0 | -6.278036 | -2.030707 | -1.949897 |
| 133 | 1 | 0 | -7.101199 | -0.218313 | -0.478143 |
| 134 | 1 | 0 | -8.452371 | -0.882940 | -1.420230 |
| 135 | 1 | 0 | -8.256686 | -1.334542 | 0.286690  |
| 136 | 1 | 0 | -7.036409 | -4.409085 | -1.540464 |
| 137 | 1 | 0 | -8.350031 | -3.787003 | -0.510400 |
| 138 | 1 | 0 | -8.299665 | -3.370055 | -2.220882 |
| 139 | 5 | 0 | -3.880936 | 0.899369  | -0.263188 |
| 140 | 5 | 0 | 3.880626  | -0.899375 | 0.262612  |

-----

**BP86/6-31G(d)**

| Center<br>Number | Atomic<br>Number | Atomic<br>Type | Coordinates (Angstroms) |           |           |
|------------------|------------------|----------------|-------------------------|-----------|-----------|
|                  |                  |                | X                       | Y         | Z         |
| 1                | 6                | 0              | 2.332055                | -1.238378 | 1.216556  |
| 2                | 6                | 0              | 1.201928                | -0.588147 | 0.590796  |
| 3                | 6                | 0              | -0.103374               | -1.227600 | 0.721592  |
| 4                | 6                | 0              | -0.189283               | -2.488387 | 1.436786  |
| 5                | 6                | 0              | 0.932077                | -3.031707 | 2.098130  |
| 6                | 6                | 0              | 2.162359                | -2.401397 | 2.002184  |
| 7                | 6                | 0              | -1.307682               | -0.664410 | 0.146522  |
| 8                | 6                | 0              | -1.418627               | -3.214537 | 1.457858  |
| 9                | 1                | 0              | 0.816012                | -3.961972 | 2.667285  |
| 10               | 1                | 0              | 3.037163                | -2.824656 | 2.511819  |
| 11               | 6                | 0              | -2.540180               | -2.694759 | 0.871758  |
| 12               | 6                | 0              | -2.581079               | -1.386844 | 0.272394  |
| 13               | 1                | 0              | -1.433826               | -4.199444 | 1.941699  |
| 14               | 1                | 0              | -3.457863               | -3.295584 | 0.864900  |
| 15               | 6                | 0              | 2.540151                | 2.694788  | -0.871737 |

|    |    |   |           |           |           |
|----|----|---|-----------|-----------|-----------|
| 16 | 6  | 0 | 1.418600  | 3.214560  | -1.457846 |
| 17 | 6  | 0 | 0.189252  | 2.488415  | -1.436759 |
| 18 | 6  | 0 | 0.103340  | 1.227640  | -0.721543 |
| 19 | 6  | 0 | 1.307647  | 0.664455  | -0.146465 |
| 20 | 6  | 0 | 2.581046  | 1.386883  | -0.272348 |
| 21 | 1  | 0 | -0.816040 | 3.961983  | -2.667280 |
| 22 | 1  | 0 | 3.457836  | 3.295608  | -0.864895 |
| 23 | 1  | 0 | 1.433803  | 4.199455  | -1.941711 |
| 24 | 6  | 0 | -0.932108 | 3.031729  | -2.098110 |
| 25 | 6  | 0 | -1.201962 | 0.588188  | -0.590746 |
| 26 | 6  | 0 | -2.332088 | 1.238412  | -1.216514 |
| 27 | 6  | 0 | -2.162391 | 2.401422  | -2.002154 |
| 28 | 1  | 0 | -3.037195 | 2.824674  | -2.511797 |
| 29 | 15 | 0 | -4.090888 | 0.772192  | -1.073773 |
| 30 | 15 | 0 | 4.090854  | -0.772160 | 1.073818  |
| 31 | 6  | 0 | -7.069679 | -2.954635 | 0.556139  |
| 32 | 6  | 0 | -7.124054 | -2.909410 | -0.809520 |
| 33 | 1  | 0 | -7.747455 | -3.409823 | 1.273832  |
| 34 | 1  | 0 | -7.850981 | -3.330253 | -1.499721 |
| 35 | 6  | 0 | -6.082028 | 3.471744  | 1.322043  |
| 36 | 6  | 0 | -5.027431 | 3.239379  | 2.163442  |
| 37 | 1  | 0 | -6.950318 | 4.115581  | 1.438081  |
| 38 | 1  | 0 | -4.805515 | 3.651084  | 3.144714  |
| 39 | 6  | 0 | 5.027383  | -3.239392 | -2.163364 |
| 40 | 6  | 0 | 6.082077  | -3.471606 | -1.322045 |
| 41 | 1  | 0 | 4.805429  | -3.651162 | -3.144600 |
| 42 | 1  | 0 | 6.950430  | -4.115349 | -1.438132 |
| 43 | 6  | 0 | 7.069708  | 2.954507  | -0.556273 |
| 44 | 6  | 0 | 7.124114  | 2.909338  | 0.809387  |
| 45 | 1  | 0 | 7.747489  | 3.409630  | -1.274001 |
| 46 | 1  | 0 | 7.851080  | 3.330174  | 1.499552  |
| 47 | 6  | 0 | -5.243568 | -1.793361 | -0.164942 |
| 48 | 6  | 0 | -4.704863 | 1.980812  | 0.309877  |
| 49 | 6  | 0 | 4.704836  | -1.980781 | -0.309826 |
| 50 | 6  | 0 | 5.243562  | 1.793347  | 0.164904  |
| 51 | 7  | 0 | -5.918600 | -2.275887 | 0.941615  |
| 52 | 7  | 0 | -6.005513 | -2.206836 | -1.241444 |
| 53 | 7  | 0 | -4.197603 | 2.319600  | 1.537951  |
| 54 | 7  | 0 | -5.870862 | 2.699566  | 0.187360  |
| 55 | 7  | 0 | 5.870929  | -2.699394 | -0.187381 |
| 56 | 7  | 0 | 4.197506  | -2.319680 | -1.537839 |
| 57 | 7  | 0 | 5.918595  | 2.275785  | -0.941691 |
| 58 | 7  | 0 | 6.005560  | 2.206819  | 1.241368  |
| 59 | 6  | 0 | -5.560596 | -1.972056 | 2.349748  |

|     |   |   |           |           |           |
|-----|---|---|-----------|-----------|-----------|
| 60  | 6 | 0 | -5.458735 | -3.258636 | 3.181706  |
| 61  | 6 | 0 | -6.560226 | -0.964192 | 2.942392  |
| 62  | 1 | 0 | -4.563634 | -1.504287 | 2.278611  |
| 63  | 1 | 0 | -4.738986 | -3.965741 | 2.738236  |
| 64  | 1 | 0 | -5.112221 | -3.011112 | 4.199519  |
| 65  | 1 | 0 | -6.436260 | -3.764962 | 3.278848  |
| 66  | 1 | 0 | -6.597228 | -0.042325 | 2.337225  |
| 67  | 1 | 0 | -7.579013 | -1.388291 | 2.995858  |
| 68  | 1 | 0 | -6.256376 | -0.694142 | 3.968730  |
| 69  | 6 | 0 | -5.599252 | -2.078332 | -2.664765 |
| 70  | 6 | 0 | -6.629837 | -1.259950 | -3.453672 |
| 71  | 6 | 0 | -5.339953 | -3.467047 | -3.271478 |
| 72  | 1 | 0 | -4.646961 | -1.520805 | -2.620270 |
| 73  | 1 | 0 | -6.763133 | -0.262548 | -3.002915 |
| 74  | 1 | 0 | -6.278501 | -1.123581 | -4.490706 |
| 75  | 1 | 0 | -7.611508 | -1.766720 | -3.496621 |
| 76  | 1 | 0 | -4.591866 | -4.021670 | -2.680526 |
| 77  | 1 | 0 | -6.263422 | -4.071307 | -3.326041 |
| 78  | 1 | 0 | -4.953319 | -3.353118 | -4.298696 |
| 79  | 6 | 0 | -6.780160 | 2.697291  | -0.993000 |
| 80  | 6 | 0 | -6.896315 | 4.111896  | -1.579479 |
| 81  | 6 | 0 | -8.137670 | 2.084140  | -0.619026 |
| 82  | 1 | 0 | -6.266063 | 2.042934  | -1.719232 |
| 83  | 1 | 0 | -5.902853 | 4.520621  | -1.829198 |
| 84  | 1 | 0 | -7.496482 | 4.075553  | -2.504632 |
| 85  | 1 | 0 | -7.397977 | 4.809704  | -0.885119 |
| 86  | 1 | 0 | -8.016568 | 1.061070  | -0.224182 |
| 87  | 1 | 0 | -8.666991 | 2.690437  | 0.138181  |
| 88  | 1 | 0 | -8.780408 | 2.034900  | -1.514722 |
| 89  | 6 | 0 | -2.903018 | 1.845965  | 2.108506  |
| 90  | 6 | 0 | -3.091460 | 1.381297  | 3.559588  |
| 91  | 6 | 0 | -1.838805 | 2.944162  | 1.968472  |
| 92  | 1 | 0 | -2.621478 | 0.978248  | 1.493601  |
| 93  | 1 | 0 | -3.900918 | 0.636431  | 3.643149  |
| 94  | 1 | 0 | -2.155966 | 0.909395  | 3.903151  |
| 95  | 1 | 0 | -3.310750 | 2.219371  | 4.245950  |
| 96  | 1 | 0 | -1.725419 | 3.252752  | 0.916674  |
| 97  | 1 | 0 | -2.094847 | 3.829925  | 2.579130  |
| 98  | 1 | 0 | -0.866211 | 2.556134  | 2.314081  |
| 99  | 6 | 0 | 5.560554  | 1.971886  | -2.349801 |
| 100 | 6 | 0 | 6.560110  | 0.963916  | -2.942393 |
| 101 | 6 | 0 | 5.458767  | 3.258420  | -3.181841 |
| 102 | 1 | 0 | 4.563563  | 1.504187  | -2.278624 |
| 103 | 1 | 0 | 6.597053  | 0.042086  | -2.337167 |



|     |   |   |           |           |           |
|-----|---|---|-----------|-----------|-----------|
| 104 | 1 | 0 | 6.256231  | 0.693822  | -3.968711 |
| 105 | 1 | 0 | 7.578925  | 1.387942  | -2.995894 |
| 106 | 1 | 0 | 4.739078  | 3.965606  | -2.738402 |
| 107 | 1 | 0 | 6.436326  | 3.764670  | -3.279037 |
| 108 | 1 | 0 | 5.112215  | 3.010853  | -4.199630 |
| 109 | 6 | 0 | 5.599340  | 2.078367  | 2.664705  |
| 110 | 6 | 0 | 5.340119  | 3.467109  | 3.271390  |
| 111 | 6 | 0 | 6.629916  | 1.259961  | 3.453599  |
| 112 | 1 | 0 | 4.647025  | 1.520879  | 2.620254  |
| 113 | 1 | 0 | 4.592033  | 4.021746  | 2.680450  |
| 114 | 1 | 0 | 4.953517  | 3.353224  | 4.298625  |
| 115 | 1 | 0 | 6.263615  | 4.071333  | 3.325903  |
| 116 | 1 | 0 | 6.763160  | 0.262544  | 3.002861  |
| 117 | 1 | 0 | 7.611609  | 1.766693  | 3.496506  |
| 118 | 1 | 0 | 6.278606  | 1.123631  | 4.490646  |
| 119 | 6 | 0 | 2.902816  | -1.846216 | -2.108298 |
| 120 | 6 | 0 | 1.838756  | -2.944550 | -1.968176 |
| 121 | 6 | 0 | 3.091087  | -1.381534 | -3.559397 |
| 122 | 1 | 0 | 2.621213  | -0.978529 | -1.493377 |
| 123 | 1 | 0 | 1.725492  | -3.253152 | -0.916368 |
| 124 | 1 | 0 | 0.866085  | -2.556650 | -2.313711 |
| 125 | 1 | 0 | 2.094865  | -3.830282 | -2.578850 |
| 126 | 1 | 0 | 3.900449  | -0.636571 | -3.643031 |
| 127 | 1 | 0 | 3.310420  | -2.219586 | -4.245772 |
| 128 | 1 | 0 | 2.155508  | -0.909746 | -3.902889 |
| 129 | 6 | 0 | 6.780340  | -2.696954 | 0.992891  |
| 130 | 6 | 0 | 8.137741  | -2.083658 | 0.618759  |
| 131 | 6 | 0 | 6.896720  | -4.111519 | 1.579424  |
| 132 | 1 | 0 | 6.266234  | -2.042625 | 1.719142  |
| 133 | 1 | 0 | 8.016478  | -1.060620 | 0.223881  |
| 134 | 1 | 0 | 8.780559  | -2.034301 | 1.514391  |
| 135 | 1 | 0 | 8.667062  | -2.689925 | -0.138472 |
| 136 | 1 | 0 | 5.903331  | -4.520351 | 1.829256  |
| 137 | 1 | 0 | 7.398401  | -4.809299 | 0.885049  |
| 138 | 1 | 0 | 7.496970  | -4.075061 | 2.504519  |
| 139 | 5 | 0 | 3.933837  | 0.921540  | 0.221365  |
| 140 | 5 | 0 | -3.933869 | -0.921512 | -0.221329 |

---
